# Supplementary material for: NCS-promoted thiocyanation and selenocyanation of pyrrolo[1,2-a]quinoxalines
Source: Royal Society of Chemistry journal article supplement (doi:10.1039/d0ob01818j), 2020-01-01
Supplement: d0ob01818j1.pdf [file d0ob01818j1.pdf]

## Supporting Information

### NCS-Promoted Thiocyanation and Selenocyanation of Pyrrolo[1,2-a]quinoxalines

Zhen Yang<sup>a</sup>, Jing He<sup>a</sup>, Yueting Wei<sup>a</sup>, Weiwei Li<sup>a</sup>, Ping Liu<sup>a\*</sup>, Jixing Zhao<sup>b</sup> and Yu Wei<sup>a\*</sup>

*<sup>a</sup>School of Chemistry and Chemical Engineering, the Key Laboratory for Green Processing of Chemical Engineering of Xinjiang Bingtuan, Shihezi University, Shihezi City, 832003, China.*

*<sup>b</sup>Analysis and Testing Center of Shihezi University, Shihezi City, 832003, China.*

### Table of Contents

|                                                                                         |     |
|-----------------------------------------------------------------------------------------|-----|
| Experimental section .....                                                              | S2  |
| <sup>1</sup> H, <sup>13</sup> C NMR, and <sup>19</sup> F NMR Spectra for Products ..... | S13 |
| Single Crystal Data of 3a.....                                                          | S53 |

## Experimental section

**General Information** Unless otherwise noted, all synthetic steps were performed under the air atmosphere using Schlenk tubes. The materials obtained from commercial sources were used without further purification.  $^1\text{H}$  NMR,  $^{13}\text{C}$  NMR, and  $^{19}\text{F}$  NMR spectra were recorded on a Bruker Advance III HD 400 MHz spectrometer in  $\text{CDCl}_3$  or  $\text{DMSO}-d_6$  solution. All chemical shifts were reported in ppm ( $\delta$ ) relative to the internal standard TMS (0 ppm). High-resolution mass spectra (HRMS) were acquired in electrospray ionization (ESI/APCI) mode using a TOF mass analyzer.

### **General procedure for NCS-promoted thiocyanation of pyrrolo[1,2-*a*]quinoxaline and KSCN or $\text{NH}_4\text{SCN}$ .**

A Schlenk tube (25 mL) was charged with pyrrolo[1,2-*a*]quinoxaline **1** (0.5 mmol), KSCN or  $\text{NH}_4\text{SCN}$  **2** (1 mmol), NCS (1.5 equiv.), and MeCN (2 mL) in air. Then the mixture was stirred at room temperature for 24 h. After reaction completion, the solution was extracted with dichloromethane ( $3 \times 10$  mL). Then, the combined organic layer was dried over anhydrous  $\text{Na}_2\text{SO}_4$ , the solvent was removed under reduced pressure and the crude was purified by flash chromatography on silica gel (petroleum ether/EtOAc) to give the final products **3**.

#### *1-Thiocyanatopyrrolo[1,2-*a*]quinoxaline (3a)*

Yield: 96%; Yellow solid; mp 146.2–147.3 °C;  $^1\text{H}$  NMR (400 MHz,  $\text{CDCl}_3$ )  $\delta$  9.27 (dd,  $J = 8.5, 0.9$  Hz, 1H), 8.86 (s, 1H), 8.07 (dd,  $J = 8.0, 1.5$  Hz, 1H), 7.71–7.63 (m, 1H), 7.63–7.55 (m, 1H), 7.28 (d,  $J = 4.3$  Hz, 1H), 6.95 (d,  $J = 4.3$  Hz, 1H).  $^{13}\text{C}\{^1\text{H}\}$  NMR (101 MHz,  $\text{CDCl}_3$ )  $\delta$  145.3, 137.2, 131.6, 131.0, 129.4, 128.8, 127.6, 126.6, 115.7, 109.1, 108.0, 104.5. HRMS (ESI):  $m/z$  calcd for  $\text{C}_{12}\text{H}_7\text{N}_3\text{S}$   $[\text{M}+\text{H}]^+$  226.04342, found: 226.04344.

#### *8-Methyl-1-thiocyanatopyrrolo[1,2-*a*]quinoxaline (3b)*

Yield: 83%; Yellow solid; mp 149.7–150.1 °C;  $^1\text{H}$  NMR (400 MHz,  $\text{CDCl}_3$ )  $\delta$  9.03 (s, 1H), 8.77 (s, 1H), 7.91 (d,  $J = 8.2$  Hz, 1H), 7.37 (dd,  $J = 8.2, 1.1$  Hz, 1H), 7.23 (d,  $J = 4.3$  Hz, 1H), 6.89 (d,  $J = 4.3$  Hz, 1H), 2.61 (s, 3H).  $^{13}\text{C}$  NMR (101 MHz,  $\text{CDCl}_3$ )  $\delta$

144.4, 139.4, 135.3, 131.7, 130.7, 129.2, 127.8, 127.5, 115.7, 109.2, 107.6, 103.9, 22.4. HRMS (APCI): m/z calcd for C<sub>13</sub>H<sub>9</sub>N<sub>3</sub>S [M+H]<sup>+</sup> 240.05899, found: 240.05865.

*8-Fluoro-1-thiocyanatopyrrolo[1,2-a]quinoxaline (3c)*

Yield: 76%; Yellow solid; mp 162.8–163.4 °C; <sup>1</sup>H NMR (400 MHz, CDCl<sub>3</sub>) δ 8.96 (dd, *J* = 10.6, 2.6 Hz, 1H), 8.79 (s, 1H), 8.02 (dd, *J* = 9.0, 6.2 Hz, 1H), 7.34 – 7.24 (m, 2H), 6.93 (d, *J* = 4.3 Hz, 1H). <sup>13</sup>C NMR (101 MHz, CDCl<sub>3</sub>) δ 161.4 (d, *J*<sub>C-F</sub> = 249.7 Hz), 144.5 (d, *J*<sub>C-F</sub> = 2.9 Hz), 134.0 (d, *J*<sub>C-F</sub> = 2.4 Hz), 132.8 (d, *J*<sub>C-F</sub> = 9.9 Hz), 131.3, 129.7 (d, *J*<sub>C-F</sub> = 11.6 Hz), 128.1, 114.6 (d, *J*<sub>C-F</sub> = 23.3 Hz), 108.7, 108.0, 104.6, 102.7 (d, *J*<sub>C-F</sub> = 29.5 Hz). <sup>19</sup>F NMR (376 MHz, CDCl<sub>3</sub>) δ -107.03. HRMS (APCI): m/z calcd for C<sub>12</sub>H<sub>6</sub>FN<sub>3</sub>S [M+H]<sup>+</sup> 244.03392, found: 244.03362.

*7-Methyl-1-thiocyanatopyrrolo[1,2-a]quinoxaline (3d)*

Yield: 82%; Yellow solid; mp 174.2–175.1 °C; <sup>1</sup>H NMR (400 MHz, CDCl<sub>3</sub>) δ 9.15 (d, *J* = 8.7 Hz, 1H), 8.84 (s, 1H), 7.85 (s, 1H), 7.48 (dd, *J* = 8.7, 1.9 Hz, 1H), 7.25 (d, *J* = 4.3 Hz, 1H), 6.93 (d, *J* = 4.3 Hz, 1H), 2.54 (s, 3H). <sup>13</sup>C{<sup>1</sup>H} NMR (101 MHz, CDCl<sub>3</sub>) δ 145.3, 137.3, 136.6, 131.5, 130.8, 129.9, 127.3, 127.2, 115.4, 109.2, 107.8, 104.0, 21.1. HRMS (APCI): m/z calcd for C<sub>13</sub>H<sub>9</sub>N<sub>3</sub>S [M+H]<sup>+</sup> 240.05899, found: 240.05855.

*7-Thiocyanatoindolo[1,2-a]quinoxaline (3e)*

Yield: 87%; Yellow solid; mp 183.7–184.9 °C; <sup>1</sup>H NMR (400 MHz, CDCl<sub>3</sub>) δ 9.30 (s, 1H), 8.51 (d, *J* = 8.7 Hz, 1H), 8.49–8.46 (m, 1H), 8.16 (dd, *J* = 5.9, 3.1 Hz, 1H), 8.12 (dd, *J* = 8.0, 1.3 Hz, 1H), 7.76–7.70 (m, 1H), 7.69–7.62 (m, 2H), 7.59–7.54 (m, 1H). <sup>13</sup>C{<sup>1</sup>H} NMR (101 MHz, CDCl<sub>3</sub>) δ 144.3, 136.4, 132.6, 131.5, 131.3, 129.9, 129.7, 129.7, 125.9, 125.6, 124.9, 120.4, 115.2, 115.2, 110.3, 88.0. HRMS (APCI): m/z calcd for C<sub>16</sub>H<sub>9</sub>N<sub>3</sub>S [M+H]<sup>+</sup> 276.05899, found: 276.05884.

*3-Iodo-1-thiocyanatopyrrolo[1,2-a]quinoxaline (3f)*

Yield: 65%; Yellow solid; mp 202.3–204.3 °C; <sup>1</sup>H NMR (400 MHz, CDCl<sub>3</sub>) δ 9.22 (dd, *J* = 8.5, 1.1 Hz, 1H), 8.79 (s, 1H), 8.10 (dd, *J* = 8.0, 1.6 Hz, 1H), 7.71 – 7.65 (m, 1H), 7.64 – 7.59 (m, 1H), 7.41 (s, 1H). <sup>13</sup>C NMR (101 MHz, CDCl<sub>3</sub>) δ 145.5, 137.6, 133.6, 131.6, 131.4, 129.2, 128.9, 127.2, 115.4, 108.6, 106.3, 61.0. HRMS (APCI): m/z calcd for C<sub>12</sub>H<sub>6</sub>IN<sub>3</sub>S [M+H]<sup>+</sup> 351.93999, found: 351.93954.

*3-Bromo-1-thiocyanatopyrrolo[1,2-a]quinoxaline (3g)*

Yield: 29%; White solid; mp 197.3–198.9 °C; <sup>1</sup>H NMR (400 MHz, CDCl<sub>3</sub>) δ 9.22 (dd, *J* = 8.5, 0.9 Hz, 1H), 8.89 (s, 1H), 8.10 (dd, *J* = 8.0, 1.6 Hz, 1H), 7.72 – 7.67 (m, 1H), 7.64 – 7.59 (m, 1H), 7.32 (s, 1H). <sup>13</sup>C NMR (101 MHz, CDCl<sub>3</sub>) δ 143.8, 137.5, 131.4, 129.2, 129.0, 128.9, 128.5, 127.2, 115.6, 108.5, 104.8, 95.3. HRMS (APCI): *m/z* calcd for C<sub>12</sub>H<sub>6</sub>BrN<sub>3</sub>S [M+H]<sup>+</sup> 303.95386, found: 303.95346.

*3-Phenyl-1-thiocyanatopyrrolo[1,2-a]quinoxaline (3h)*

Yield: 56%; Yellow solid; mp 154.2–155.7 °C; <sup>1</sup>H NMR (400 MHz, CDCl<sub>3</sub>) δ 9.26 (dd, *J* = 8.6, 1.1 Hz, 1H), 9.04 (s, 1H), 8.06 (dd, *J* = 8.0, 1.6 Hz, 1H), 7.70 – 7.64 (m, 1H), 7.60 – 7.47 (m, 5H), 7.45 – 7.40 (m, 1H), 7.38 (s, 1H). <sup>13</sup>C NMR (101 MHz, CDCl<sub>3</sub>) δ 144.6, 137.5, 132.4, 131.0, 129.3, 128.8, 128.7, 128.1, 127.8, 126.7, 126.6, 124.0, 115.7, 109.0, 104.5. HRMS (APCI): *m/z* calcd for C<sub>18</sub>H<sub>11</sub>N<sub>3</sub>S [M+H]<sup>+</sup> 302.07464, found: 302.07413.

*1-Thiocyanato-3-(4-vinylphenyl)pyrrolo[1,2-a]quinoxaline (3i)*

Yield: 61%; Yellow solid; mp 150.1–151.4 °C; <sup>1</sup>H NMR (400 MHz, CDCl<sub>3</sub>) δ 9.23 (dd, *J* = 8.6, 1.2 Hz, 1H), 9.02 (s, 1H), 8.04 (dd, *J* = 8.0, 1.6 Hz, 1H), 7.68 – 7.62 (m, 1H), 7.60 – 7.48 (m, 5H), 7.36 (s, 1H), 6.77 (dd, *J* = 17.6, 10.9 Hz, 1H), 5.83 (d, *J* = 17.6 Hz, 1H), 5.33 (d, *J* = 10.9 Hz, 1H). <sup>13</sup>C NMR (101 MHz, CDCl<sub>3</sub>) δ 144.5, 137.5, 137.3, 136.2, 131.8, 131.0, 129.3, 128.8, 128.7, 127.8, 127.1, 126.6, 126.6, 123.6, 115.7, 114.7, 109.0, 104.6. HRMS (APCI): *m/z* calcd for C<sub>20</sub>H<sub>13</sub>N<sub>3</sub>S [M+H]<sup>+</sup> 328.09029, found: 328.08993.

*4-Phenyl-1-thiocyanatopyrrolo[1,2-a]quinoxaline (3j)*

Yield: 81%; Yellow solid; mp 159.2–159.8 °C; <sup>1</sup>H NMR (400 MHz, CDCl<sub>3</sub>) δ 9.32 (dd, *J* = 8.5, 1.3 Hz, 1H), 8.14 (dd, *J* = 8.0, 1.7 Hz, 1H), 7.93–7.89 (m, 2H), 7.69–7.64 (m, 1H), 7.62–7.54 (m, 4H), 7.29 (d, *J* = 4.4 Hz, 1H), 7.02 (d, *J* = 4.4 Hz, 1H). <sup>13</sup>C {<sup>1</sup>H} NMR (101 MHz, CDCl<sub>3</sub>) δ 154.2, 137.5, 137.5, 131.2, 131.0, 130.3, 128.9, 128.8, 128.6, 128.3, 127.6, 126.7, 115.5, 109.4, 109.3, 104.8. HRMS (ESI): *m/z* calcd for C<sub>18</sub>H<sub>11</sub>N<sub>3</sub>S [M+H]<sup>+</sup> 302.07458, found: 302.07455.

*4-(4-Fluorophenyl)-1-thiocyanatopyrrolo[1,2-a]quinoxaline (3k)*

Yield: 90%; Yellow solid; mp 168.3–170.1 °C; <sup>1</sup>H NMR (400 MHz, CDCl<sub>3</sub>) δ 9.32 (dd, *J* = 8.5, 1.0 Hz, 1H), 8.12 (dd, *J* = 8.0, 1.6 Hz, 1H), 7.95–7.90 (m, 2H), 7.69–7.64 (m, 1H), 7.62–7.57 (m, 1H), 7.30 (d, *J* = 4.4 Hz, 1H), 7.26 (d, *J* = 5.3 Hz, 1H), 7.24 (d, *J* = 8.7 Hz, 1H), 6.99 (d, *J* = 4.4 Hz, 1H). <sup>13</sup>C{<sup>1</sup>H} NMR (101 MHz, CDCl<sub>3</sub>) δ 165.4, 162.9, 153.1, 137.4, 133.6, 133.6, 131.2, 130.9, 130.8, 130.8, 128.5, 128.5, 127.7, 126.8, 116.1, 115.9, 115.6, 109.2, 109.2, 105.1. <sup>19</sup>F NMR (376 MHz, CDCl<sub>3</sub>) δ -110.15. HRMS (ESI): *m/z* calcd for C<sub>18</sub>H<sub>10</sub>FN<sub>3</sub>S [M+H]<sup>+</sup> 320.0652, found: 320.0657.

*4-(4-Chlorophenyl)-1-thiocyanatopyrrolo[1,2-a]quinoxaline (3l)*

Yield: 68%; Yellow solid; mp 190.2–190.7 °C; <sup>1</sup>H NMR (400 MHz, CDCl<sub>3</sub>) δ 9.31 (d, *J* = 8.5 Hz, 1H), 8.11 (dd, *J* = 8.0, 1.5 Hz, 1H), 7.87 (d, *J* = 8.4 Hz, 2H), 7.70–7.64 (m, 1H), 7.62–7.57 (m, 1H), 7.53 (d, *J* = 8.4 Hz, 2H), 7.30 (d, *J* = 4.3 Hz, 1H), 6.98 (d, *J* = 4.4 Hz, 1H). <sup>13</sup>C{<sup>1</sup>H} NMR (101 MHz, CDCl<sub>3</sub>) δ 153.0, 137.4, 136.5, 135.9, 131.2, 130.7, 130.2, 129.2, 128.6, 128.6, 127.7, 126.8, 115.6, 109.2, 109.2, 105.2. HRMS (APCI): *m/z* calcd for C<sub>18</sub>H<sub>10</sub>ClN<sub>3</sub>S [M+H]<sup>+</sup> 336.03567, found: 336.03491.

*4-(4-Bromophenyl)-1-thiocyanatopyrrolo[1,2-a]quinoxaline (3m)*

Yield: 74%; Yellow solid; mp 191.3–192.9 °C; <sup>1</sup>H NMR (400 MHz, CDCl<sub>3</sub>) δ 9.31 (dd, *J* = 8.6, 0.8 Hz, 1H), 8.11 (dd, *J* = 8.0, 1.5 Hz, 1H), 7.80 (d, *J* = 8.5 Hz, 2H), 7.69 (d, *J* = 8.5 Hz, 2H), 7.66 (dd, *J* = 8.6, 1.5 Hz, 1H), 7.62–7.56 (m, 1H), 7.29 (d, *J* = 4.4 Hz, 1H), 6.98 (d, *J* = 4.4 Hz, 1H). <sup>13</sup>C{<sup>1</sup>H} NMR (101 MHz, CDCl<sub>3</sub>) δ 153.0, 137.4, 136.4, 132.1, 131.2, 130.6, 130.4, 128.6, 128.5, 127.7, 126.8, 124.8, 115.6, 109.2, 109.1, 105.2. HRMS (ESI): *m/z* calcd for C<sub>18</sub>H<sub>10</sub>BrN<sub>3</sub>S [M+Na]<sup>+</sup> 401.9671, found: 401.9675.

*1-Thiocyanato-4-(p-tolyl)pyrrolo[1,2-a]quinoxaline (3n)*

Yield: 80%; Yellow solid; mp 179.5–180.9 °C; <sup>1</sup>H NMR (400 MHz, CDCl<sub>3</sub>) δ 9.31 (dd, *J* = 8.5, 1.1 Hz, 1H), 8.13 (dd, *J* = 8.0, 1.6 Hz, 1H), 7.82 (d, *J* = 8.1 Hz, 2H), 7.68–7.62 (m, 1H), 7.61–7.56 (m, 1H), 7.36 (d, *J* = 7.9 Hz, 2H), 7.28 (d, *J* = 4.3 Hz, 1H), 7.03 (d, *J* = 4.4 Hz, 1H), 2.47 (s, 3H). <sup>13</sup>C{<sup>1</sup>H} NMR (101 MHz, CDCl<sub>3</sub>) δ 154.2, 140.5, 137.6, 134.7, 131.1, 131.1, 129.6, 128.8, 128.5, 128.2, 127.6, 126.6, 115.5,

109.4, 109.4, 104.6, 21.6. HRMS (ESI):  $m/z$  calcd for  $C_{19}H_{13}N_3S$   $[M+H]^+$  316.0903, found: 316.0908.

*4-(4-Methoxyphenyl)-1-thiocyanatopyrrolo[1,2-a]quinoxaline (3o)*

Yield: 78%; Yellow solid; mp 173.1–174.3 °C;  $^1H$  NMR (400 MHz,  $CDCl_3$ )  $\delta$  9.30 (dd,  $J = 8.5, 1.1$  Hz, 1H), 8.12 (dd,  $J = 7.9, 1.5$  Hz, 1H), 7.90 (d,  $J = 8.8$  Hz, 2H), 7.66–7.61 (m, 1H), 7.60–7.55 (m, 1H), 7.28 (d,  $J = 4.3$  Hz, 1H), 7.07 (d,  $J = 8.8$  Hz, 2H), 7.04 (d,  $J = 4.4$  Hz, 1H), 3.90 (s, 3H).  $^{13}C\{^1H\}$  NMR (101 MHz,  $CDCl_3$ )  $\delta$  161.4, 153.7, 137.6, 131.0, 131.0, 130.3, 130.0, 128.4, 128.0, 127.6, 126.6, 115.5, 114.3, 109.4, 104.6, 55.6. HRMS (ESI):  $m/z$  calcd for  $C_{19}H_{13}N_3OS$   $[M+H]^+$  332.0852, found: 332.0854.

*4-(1-Thiocyanatopyrrolo[1,2-a]quinoxalin-4-yl)benzotrile (3p)*

Yield: 51%; Yellow solid; mp 221.2–222.5 °C;  $^1H$  NMR (400 MHz,  $CDCl_3$ )  $\delta$  9.35 (dd,  $J = 8.6, 1.0$  Hz, 1H), 8.14 (dd,  $J = 8.0, 1.5$  Hz, 1H), 8.06 (d,  $J = 8.5$  Hz, 2H), 7.87 (d,  $J = 8.5$  Hz, 2H), 7.76–7.68 (m, 1H), 7.66–7.61 (m, 1H), 7.34 (d,  $J = 4.4$  Hz, 1H), 6.98 (d,  $J = 4.4$  Hz, 1H).  $^{13}C\{^1H\}$  NMR (101 MHz,  $CDCl_3$ )  $\delta$  152.1, 141.7, 137.2, 132.7, 131.4, 130.3, 129.6, 129.2, 128.6, 127.8, 127.0, 118.5, 115.6, 114.0, 109.0, 108.9, 105.7. HRMS (APCI):  $m/z$  calcd for  $C_{18}H_{10}N_4O_2S$   $[M+H]^+$  327.06989, found: 327.06940.

*4-(4-Nitrophenyl)-1-thiocyanatopyrrolo[1,2-a]quinoxaline (3q)*

Yield: 61%; Yellow solid; mp 194.7–195.9 °C;  $^1H$  NMR (400 MHz,  $CDCl_3$ )  $\delta$  9.35 (dd,  $J = 8.6, 0.8$  Hz, 1H), 8.42 (d,  $J = 8.8$  Hz, 2H), 8.15 (dd,  $J = 8.2, 1.5$  Hz, 1H), 8.12 (d,  $J = 8.8$  Hz, 2H), 7.76–7.70 (m, 1H), 7.67–7.60 (m, 1H), 7.35 (d,  $J = 4.4$  Hz, 1H), 6.99 (d,  $J = 4.4$  Hz, 1H).  $^{13}C$  NMR (101 MHz,  $CDCl_3$ )  $\delta$  151.8, 148.9, 143.4, 137.2, 131.5, 130.3, 129.9, 129.3, 128.6, 127.9, 127.0, 124.1, 115.7, 109.0, 108.9, 105.8. HRMS (APCI):  $m/z$  calcd for  $C_{18}H_{10}N_4O_2S$   $[M+H]^+$  347.05972, found: 347.05942.

*2-(1-Thiocyanatopyrrolo[1,2-a]quinoxalin-4-yl)phenol (3r)*

Yield: 59%; Yellow solid; mp 183.1–184.2 °C;  $^1H$  NMR (400 MHz,  $DMSO-d_6$ )  $\delta$  10.27 (s, 1H), 9.35 (d,  $J = 8.4$  Hz, 1H), 8.05 (dd,  $J = 8.0, 1.3$  Hz, 1H), 7.82–7.74 (m, 1H), 7.70–7.62 (m, 1H), 7.53 (dd,  $J = 7.6, 1.5$  Hz, 1H), 7.45 (d,  $J = 4.3$  Hz, 1H), 7.43–

7.32 (m, 1H), 7.04 (d,  $J = 8.0$  Hz, 1H), 6.99 (t,  $J = 7.5$  Hz, 1H), 6.83 (d,  $J = 4.3$  Hz, 1H).  $^{13}\text{C}\{^1\text{H}\}$  NMR (101 MHz, DMSO- $d_6$ )  $\delta$  155.8, 153.2, 136.2, 131.2, 130.3, 130.1, 129.9, 128.4, 128.0, 127.0, 126.5, 123.2, 119.1, 116.5, 115.7, 111.3, 109.6, 107.2. HRMS (APCI):  $m/z$  calcd for  $\text{C}_{18}\text{H}_{11}\text{N}_3\text{OS}$   $[\text{M}+\text{H}]^+$  318.06956, found: 318.06918.

*4-(2,4-Dichlorophenyl)-1-thiocyanatopyrrolo[1,2-a]quinoxaline (3s)*

Yield: 73%; Yellow solid; mp 209.7–210.2 °C;  $^1\text{H}$  NMR (400 MHz,  $\text{CDCl}_3$ )  $\delta$  9.35 (dd,  $J = 8.6, 1.0$  Hz, 1H), 8.13 (dd,  $J = 8.1, 1.5$  Hz, 1H), 7.76–7.70 (m, 1H), 7.65–7.60 (m, 1H), 7.59 (d,  $J = 1.9$  Hz, 1H), 7.52–7.41 (m, 2H), 7.27 (d,  $J = 4.3$  Hz, 1H), 6.60 (d,  $J = 4.3$  Hz, 1H).  $^{13}\text{C}\{^1\text{H}\}$  NMR (101 MHz,  $\text{CDCl}_3$ )  $\delta$  151.9, 137.0, 136.3, 134.5, 134.0, 131.7, 131.3, 130.9, 130.2, 129.1, 128.9, 127.7, 127.7, 126.8, 115.6, 109.2, 109.1, 105.1. HRMS (APCI):  $m/z$  calcd for  $\text{C}_{18}\text{H}_9\text{Cl}_2\text{N}_3\text{S}$   $[\text{M}+\text{H}]^+$  369.99670, found: 369.99634.

*4-(Furan-2-yl)-1-thiocyanatopyrrolo[1,2-a]quinoxaline (3t)*

Yield: 81%; Yellow solid; mp 169.3–170.6 °C;  $^1\text{H}$  NMR (400 MHz,  $\text{CDCl}_3$ )  $\delta$  9.28 (dd,  $J = 8.4, 1.1$  Hz, 1H), 8.08 (dd,  $J = 7.9, 1.6$  Hz, 1H), 7.72 (d,  $J = 0.8$  Hz, 1H), 7.64–7.59 (m, 1H), 7.59–7.53 (m, 2H), 7.43 (d,  $J = 3.4$  Hz, 1H), 7.33 (d,  $J = 4.4$  Hz, 1H), 6.66 (dd,  $J = 3.5, 1.7$  Hz, 1H).  $^{13}\text{C}\{^1\text{H}\}$  NMR (101 MHz,  $\text{CDCl}_3$ )  $\delta$  151.8, 144.9, 142.9, 137.0, 130.8, 128.6, 128.3, 128.1, 127.9, 126.6, 115.4, 113.6, 112.3, 109.3, 109.2, 104.5. HRMS (APCI):  $m/z$  calcd for  $\text{C}_{16}\text{H}_9\text{N}_3\text{OS}$   $[\text{M}+\text{H}]^+$  292.05391, found: 292.05350.

*7-Chloro-4-(4-methoxyphenyl)-1-thiocyanatopyrrolo[1,2-a]quinoxaline (3u)*

Yield: 71%; mp 161.2–162.7 °C; Yellow solid;  $^1\text{H}$  NMR (400 MHz,  $\text{CDCl}_3$ )  $\delta$  9.19 (d,  $J = 9.1$  Hz, 1H), 8.05 (d,  $J = 2.5$  Hz, 1H), 7.87 (d,  $J = 8.8$  Hz, 2H), 7.55 (dd,  $J = 9.1, 2.5$  Hz, 1H), 7.27 (d,  $J = 4.4$  Hz, 1H), 7.09–7.03 (m, 3H), 3.90 (s, 3H).  $^{13}\text{C}\{^1\text{H}\}$  NMR (101 MHz,  $\text{CDCl}_3$ )  $\delta$  161.6, 154.7, 138.6, 131.8, 130.7, 130.36, 130.1, 129.5, 127.8, 127.7, 126.9, 116.6, 114.3, 109.9, 109.1, 105.1, 55.6. HRMS (APCI):  $m/z$  calcd for  $\text{C}_{19}\text{H}_{12}\text{ClN}_3\text{OS}$   $[\text{M}+\text{H}]^+$  366.04624, found: 366.04596.

*7-Chloro-4-(4-nitrophenyl)-1-thiocyanatopyrrolo[1,2-a]quinoxaline (3v)*

Yield: 70%; Yellow solid; mp 210.5–211.3 °C; <sup>1</sup>H NMR (400 MHz, DMSO-*d*<sub>6</sub>) δ 9.36 (d, *J* = 9.2 Hz, 1H), 8.44 (d, *J* = 8.9 Hz, 2H), 8.20 (d, *J* = 8.9 Hz, 2H), 8.14 (d, *J* = 2.5 Hz, 1H), 7.88 (dd, *J* = 9.2, 2.6 Hz, 1H), 7.59 (d, *J* = 4.4 Hz, 1H), 7.19 (d, *J* = 4.4 Hz, 1H). <sup>13</sup>C{<sup>1</sup>H} NMR (101 MHz, DMSO-*d*<sub>6</sub>) δ 152.7, 148.5, 142.3, 137.6, 130.5, 130.2, 129.4, 128.7, 128.6, 127.5, 126.9, 123.9, 117.6, 110.9, 109.8, 109.4. HRMS (APCI): *m/z* calcd for C<sub>18</sub>H<sub>9</sub>ClN<sub>4</sub>O<sub>2</sub>S [M+H]<sup>+</sup> 381.02075, found: 381.02008.

*4-(4-Methoxyphenyl)-7-methyl-1-thiocyanatopyrrolo[1,2-*a*]quinoxaline (3w)*

Yield: 84%; Yellow solid; mp 175.3–176.6 °C; <sup>1</sup>H NMR (400 MHz, CDCl<sub>3</sub>) δ 9.09 (d, *J* = 8.7 Hz, 1H), 7.86 (d, *J* = 8.7 Hz, 3H), 7.38 (dd, *J* = 8.7, 1.9 Hz, 1H), 7.18 (d, *J* = 4.3 Hz, 1H), 7.04 (d, *J* = 8.8 Hz, 2H), 6.96 (d, *J* = 4.4 Hz, 1H), 3.88 (s, 3H), 2.49 (s, 3H). <sup>13</sup>C{<sup>1</sup>H} NMR (101 MHz, CDCl<sub>3</sub>) δ 161.2, 153.4, 137.4, 136.4, 130.6, 130.5, 130.2, 130.0, 129.1, 127.0, 126.1, 115.0, 114.1, 109.4, 109.0, 104.0, 55.5, 21.0. HRMS (APCI): *m/z* calcd for C<sub>20</sub>H<sub>15</sub>N<sub>3</sub>OS [M+H]<sup>+</sup> 346.10086, found: 346.10049.

*7-Methyl-4-(4-nitrophenyl)-1-thiocyanatopyrrolo[1,2-*a*]quinoxaline (3x)*

Yield: 49%; Yellow solid; mp 221.8–222.4 °C; <sup>1</sup>H NMR (400 MHz, CDCl<sub>3</sub>) δ 9.22 (d, *J* = 8.7 Hz, 1H), 8.42 (d, *J* = 8.8 Hz, 2H), 8.11 (d, *J* = 8.9 Hz, 2H), 7.95–7.93 (m, 2H), 7.54 (dd, *J* = 8.8, 1.8 Hz, 1H), 7.31 (d, *J* = 4.4 Hz, 1H), 6.97 (d, *J* = 4.4 Hz, 1H), 2.56 (s, 3H). <sup>13</sup>C{<sup>1</sup>H} NMR (101 MHz, CDCl<sub>3</sub>) δ 151.6, 148.8, 143.5, 138.6, 137.2, 137.1, 133.3, 131.1, 130.5, 130.2, 129.9, 127.5, 126.5, 124.1, 115.3, 109.1, 108.7, 105.3, 21.1. HRMS (APCI): *m/z* calcd for C<sub>19</sub>H<sub>12</sub>N<sub>4</sub>O<sub>2</sub>S [M+H]<sup>+</sup> 361.07537, found: 361.07471.

**General procedure for NCS-promoted selenocyanation of pyrrolo[1,2-*a*]quinoxaline and KSeCN.**

A Schlenk tube (25 mL) was charged with pyrrolo[1,2-*a*]quinoxaline **1** (0.5 mmol), KSeCN (1 mmol), NCS (1.5 equiv.), and EtOAc (2 mL) in air. Then the mixture was stirred at room temperature for 24 h. After reaction completion, the solution was extracted with dichloromethane (3 × 10 mL). Then, the combined organic layer was dried over anhydrous Na<sub>2</sub>SO<sub>4</sub>, the solvent was removed under reduced pressure and



the crude was purified by flash chromatography on silica gel (petroleum ether/EtOAc) to give the final products **4**.

*1-Selenocyanatopyrrolo[1,2-a]quinoxaline (4a)*

Yield: 72%; Yellow solid; mp 167.7–168.1 °C; <sup>1</sup>H NMR (400 MHz, CDCl<sub>3</sub>) δ 9.07 (s, 1H), 8.08 (dd, *J* = 8.0, 1.5 Hz, 1H), 8.02 (d, *J* = 2.8 Hz, 1H), 7.92 (dd, *J* = 8.2, 1.2 Hz, 1H), 7.68–7.62 (m, 1H), 7.60–7.54 (m, 1H), 7.17 (d, *J* = 2.9 Hz, 1H). <sup>13</sup>C{<sup>1</sup>H} NMR (101 MHz, CDCl<sub>3</sub>) δ 143.9, 136.2, 130.9, 129.2, 128.4, 127.1, 126.7, 120.9, 115.4, 113.9, 101.12, 92.4. HRMS (APCI): *m/z* calcd for C<sub>12</sub>H<sub>7</sub>N<sub>3</sub>Se [M+H]<sup>+</sup> 273.98780, found: 273.98737.

*7-Methyl-1-selenocyanatopyrrolo[1,2-a]quinoxaline (4b)*

Yield: 47%; Yellow solid; mp 180.1–181.9 °C; <sup>1</sup>H NMR (400 MHz, DMSO-*d*<sub>6</sub>) δ 9.29 (d, *J* = 8.7 Hz, 1H), 8.98 (s, 1H), 7.80 (s, 1H), 7.55 (dd, *J* = 8.8, 2.0 Hz, 1H), 7.34 (d, *J* = 4.1 Hz, 1H), 7.13 (d, *J* = 4.2 Hz, 1H), 2.48 (s, 3H). <sup>13</sup>C{<sup>1</sup>H} NMR (101 MHz, DMSO-*d*<sub>6</sub>) δ 145.6, 136.6, 135.6, 130.0, 129.8, 129.0, 127.6, 126.9, 115.6, 108.5, 106.1, 105.2, 20.4. HRMS (APCI): *m/z* calcd for C<sub>13</sub>H<sub>9</sub>N<sub>3</sub>Se [M+H]<sup>+</sup> 288.00345, found: 288.00290.

*8-Fluoro-1-selenocyanatopyrrolo[1,2-a]quinoxaline (4c)*

Yield: 40%; Yellow solid; mp 147.1–148.1 °C; <sup>1</sup>H NMR (400 MHz, CDCl<sub>3</sub>) δ 9.09 (dd, *J* = 10.7, 2.6 Hz, 1H), 8.84 (s, 1H), 8.05 (dd, *J* = 9.0, 6.2 Hz, 1H), 7.33 (d, *J* = 4.1 Hz, 1H), 7.32–7.28 (m, 1H), 6.97 (d, *J* = 4.2 Hz, 1H). <sup>13</sup>C NMR (101 MHz, CDCl<sub>3</sub>) δ 161.4 (d, *J*<sub>C-F</sub> = 249.4 Hz), 144.5 (d, *J*<sub>C-F</sub> = 2.5 Hz), 134.0, 132.8 (d, *J*<sub>C-F</sub> = 9.9 Hz), 131.6, 130.1 (d, *J*<sub>C-F</sub> = 11.1 Hz), 129.7, 114.6 (d, *J*<sub>C-F</sub> = 23.3 Hz), 108.5, 102.8 (d, *J*<sub>C-F</sub> = 29.6 Hz), 100.6, 99.7. HRMS (APCI): *m/z* calcd for C<sub>12</sub>H<sub>6</sub>FN<sub>3</sub>Se [M+H]<sup>+</sup> 291.97837, found: 291.97837.

*4-Phenyl-1-selenocyanatopyrrolo[1,2-a]quinoxaline (4d)*

Yield: 68%; Yellow solid; mp 170.5–171.8 °C; <sup>1</sup>H NMR (400 MHz, CDCl<sub>3</sub>) δ 9.27 (dd, *J* = 8.5, 1.0 Hz, 1H), 8.08 (dd, *J* = 7.9, 1.6 Hz, 1H), 7.93–7.87 (m, 2H), 7.62–7.56 (m, 1H), 7.55–7.50 (m, 4H), 7.23 (d, *J* = 4.3 Hz, 1H), 6.97 (d, *J* = 4.3 Hz, 1H). <sup>13</sup>C{<sup>1</sup>H} NMR (101 MHz, CDCl<sub>3</sub>) δ 153.9, 137.4, 137.3, 130.9, 130.8, 130.2, 128.9, 128.7,

128.7, 128.5, 127.9, 126.3, 115.4, 109.6, 100.7, 100.4. HRMS (APCI): m/z calcd for C<sub>18</sub>H<sub>11</sub>N<sub>3</sub>Se [M+H]<sup>+</sup> 350.01910, found: 350.01868.

*4-(4-Methoxyphenyl)-1-selenocyanatopyrrolo[1,2-a]quinoxaline (4e)*

Yield: 50%; Yellow solid; mp 197.0–197.3 °C; <sup>1</sup>H NMR (400 MHz, CDCl<sub>3</sub>) δ 9.32 (dd, *J* = 8.4, 1.1 Hz, 1H), 8.10 (dd, *J* = 7.9, 1.6 Hz, 1H), 7.89 (d, *J* = 8.9 Hz, 2H), 7.64–7.59 (m, 1H), 7.58–7.53 (m, 1H), 7.29 (d, *J* = 4.3 Hz, 1H), 7.07 (d, *J* = 8.9 Hz, 2H), 7.04 (d, *J* = 4.3 Hz, 1H), 3.90 (s, 3H). <sup>13</sup>C{<sup>1</sup>H} NMR (101 MHz, CDCl<sub>3</sub>) δ 161.3, 153.6, 137.5, 131.1, 130.9, 130.3, 130.1, 129.1, 128.6, 127.8, 126.5, 115.5, 114.3, 109.7, 100.6, 100.5, 55.6. HRMS (APCI): m/z calcd for C<sub>19</sub>H<sub>13</sub>N<sub>3</sub>OSe [M+H]<sup>+</sup> 380.02966, found: 380.02905.

*4-(4-Bromophenyl)-1-selenocyanatopyrrolo[1,2-a]quinoxaline (4f)*

Yield: 42%; Yellow solid; mp 181.1–182.9 °C; <sup>1</sup>H NMR (400 MHz, CDCl<sub>3</sub>) δ 9.35 (dd, *J* = 8.5, 1.1 Hz, 1H), 8.11 (dd, *J* = 8.0, 1.6 Hz, 1H), 7.81 (d, *J* = 8.5 Hz, 2H), 7.72–7.63 (m, 3H), 7.62–7.56 (m, 1H), 7.31 (d, *J* = 4.3 Hz, 1H), 6.99 (d, *J* = 4.3 Hz, 1H). <sup>13</sup>C{<sup>1</sup>H} NMR (101 MHz, CDCl<sub>3</sub>) δ 152.9, 137.4, 136.5, 132.1, 131.2, 130.8, 130.4, 129.2, 128.7, 128.4, 126.7, 124.8, 115.6, 109.5, 101.1, 100.3. HRMS (APCI): m/z calcd for C<sub>18</sub>H<sub>10</sub>BrN<sub>3</sub>Se [M+H]<sup>+</sup> 427.92961, found: 427.92892.

*4-(4-Nitrophenyl)-1-selenocyanatopyrrolo[1,2-a]quinoxaline (4g)*

Yield: 38%; Yellow solid; mp 185.9–186.9 °C; <sup>1</sup>H NMR (400 MHz, CDCl<sub>3</sub>) δ 9.38 (d, *J* = 8.0 Hz, 1H), 8.42 (d, *J* = 8.8 Hz, 2H), 8.22 – 8.05 (m, 3H), 7.74 – 7.69 (m, 1H), 7.66 – 7.59 (m, 1H), 7.36 (d, *J* = 4.3 Hz, 1H), 6.99 (d, *J* = 4.3 Hz, 1H). <sup>13</sup>C NMR (101 MHz, CDCl<sub>3</sub>) δ 151.7, 148.9, 143.5, 137.2, 131.4, 130.4, 129.9, 129.4, 129.1, 128.8, 126.9, 124.1, 115.7, 109.3, 101.6, 100.1. HRMS (APCI): m/z calcd for C<sub>18</sub>H<sub>10</sub>N<sub>4</sub>O<sub>2</sub>Se [M+H]<sup>+</sup> 395.00417, found: 395.00354.

**General procedure for gram-scale experiment.**

A 50 mL round-bottomed flask was charged with **1a** (6 mmol), **2a** (12 mmol), NCS (1.5 equiv.), and MeCN (20 mL). The solution was stirred at room temperature for 24 h. After reaction completion, the solvent was removed under reduced pressure and the

crude was purified by flash chromatography on silica gel (petroleum ether/EtOAc) to give the final product **3a** (1.128 g, 83% yield).

**Typical procedure for the synthesis of 3aa.**

To a 25 mL Schlenk tube equipped with a magnetic stirring bar, **3a** (0.2 mmol), concentrated sulfuric acid (18 M) (0.1 mL), and CH<sub>2</sub>Cl<sub>2</sub> (2 mL) were added. The reaction vessel was allowed to stir under the ice bath condition for 4 h. After completion of the reaction, the mixture was washed with the saturated NaHCO<sub>3</sub> aqueous solution (10 mL) and extracted with dichloromethane (3 × 10 mL). The organic phase was dried over Na<sub>2</sub>SO<sub>4</sub> and concentrated in a vacuum. The crude was purified by flash chromatography on silica gel (petroleum ether/EtOAc) to give the final product pyrrolo[1,2-*a*]quinoxaline-1-thiol **3aa** in 84% yield.

*Pyrrolo[1,2-*a*]quinoxaline-1-thiol (3aa)*

Yield: 84%; Yellow solid; mp 126.3–127.8 °C; <sup>1</sup>H NMR (400 MHz, CDCl<sub>3</sub>) δ 9.01 (d, *J* = 8.0 Hz, 1H), 8.57 (s, 1H), 7.74 (dd, *J* = 8.1, 1.4 Hz, 1H), 7.26–7.21 (m, 1H), 6.94 (d, *J* = 4.2 Hz, 1H), 6.93–6.87 (m, 1H), 6.73 (d, *J* = 4.2 Hz, 1H). <sup>13</sup>C{<sup>1</sup>H} NMR (101 MHz, CDCl<sub>3</sub>) δ 144.8, 136.7, 131.2, 130.2, 129.4, 127.9, 127.1, 125.5, 120.6, 115.4, 107.5. HRMS (APCI): *m/z* calcd for C<sub>11</sub>H<sub>7</sub>N<sub>2</sub>S [M-H]<sup>+</sup> 199.03245, found 199.03285.

**Typical procedure for the synthesis of 3ab.**

To a 25 mL Schlenk tube equipped with a magnetic stirring bar, **3a** (0.2 mmol), TMSCF<sub>3</sub> (2 equiv.), Cs<sub>2</sub>CO<sub>3</sub> (2 equiv.) and MeCN (2 mL) were added. The reaction vessel was allowed to stir at room temperature for 15 h. After reaction completion, the solvent was removed under reduced pressure and the crude was purified by flash chromatography on silica gel (petroleum ether/EtOAc) to give the final product **3ab** in 45% yield.

*1-((Trifluoromethyl)thio)pyrrolo[1,2-*a*]quinoxaline (3ab)*

Yield: 45%; White solid; mp 94.2–94.8 °C; <sup>1</sup>H NMR (400 MHz, CDCl<sub>3</sub>) δ 9.58 (dd, *J* = 8.7, 0.8 Hz, 1H), 8.84 (s, 1H), 8.02 (dd, *J* = 7.9, 1.8 Hz, 1H), 7.61–7.56 (m, 1H), 7.56–7.50 (m, 1H), 7.25 (d, *J* = 4.2 Hz, 1H), 6.94 (d, *J* = 4.2 Hz, 1H). <sup>13</sup>C{<sup>1</sup>H} NMR (101 MHz, CDCl<sub>3</sub>) δ 145.5, 137.2, 131.7, 130.8, 129.9, 129.8, 129.5, 128.2, 126.7,

126.2, 116.4, 107.7.  $^{19}\text{F}$  NMR (376 MHz,  $\text{CDCl}_3$ )  $\delta$  -44.44. HRMS (APCI):  $m/z$  calcd for  $\text{C}_{12}\text{H}_7\text{F}_3\text{N}_2\text{S}$   $[\text{M}+\text{H}]^+$  269.03548, found: 269.03510.

**Typical procedure for the synthesis of 4aa.**

To a 25 mL Schlenk tube equipped with a magnetic stirring bar, **4a** (0.1 mmol), phenylacetylene (0.1 mmol),  $\text{Cu}(\text{OAc})_2$  (5 mol%),  $\text{Ag}_2\text{CO}_3$  (20 mol%),  $\text{Cs}_2\text{CO}_3$  (1 equiv.), and NMP (1.5 mL) were added. The reaction vessel was allowed to stir at 100 °C for 8 h under argon atmosphere. After completion of the reaction, the mixture was washed with the saturated solution of NaCl ( $3 \times 10$  mL) and extracted with ethyl acetate ( $3 \times 10$  mL). The organic phase was dried over  $\text{Na}_2\text{SO}_4$  and concentrated in a vacuum. The crude mixture was purified via column chromatography using ethyl acetate/petroleum ether as eluent to give the final product **4aa** in 44% yield.

*1-((Phenylethynyl)selanyl)pyrrolo[1,2-a]quinoxaline (4aa)*

Yield: 44%; White solid; mp 169.7–170.9 °C;  $^1\text{H}$  NMR (400 MHz,  $\text{CDCl}_3$ )  $\delta$  9.11 (s, 1H), 8.02 (dd,  $J = 8.0, 1.4$  Hz, 1H), 7.94 (d,  $J = 2.6$  Hz, 1H), 7.86 (dd,  $J = 8.2, 1.2$  Hz, 1H), 7.54–7.60 (m, 1H), 7.53–7.47 (m, 1H), 7.41–7.37 (m, 2H), 7.27 (d,  $J = 2.1$  Hz, 2H), 7.26 (d,  $J = 1.8$  Hz, 1H), 7.13 (d,  $J = 2.8$  Hz, 1H).  $^{13}\text{C}\{^1\text{H}\}$  NMR (101 MHz,  $\text{CDCl}_3$ )  $\delta$  145.0, 136.1, 131.8, 130.5, 128.5, 128.5, 128.4, 127.6, 127.1, 126.0, 123.2, 119.6, 114.6, 113.8, 100.7, 97.7, 70.5. HRMS (APCI):  $m/z$  calcd for  $\text{C}_{19}\text{H}_{12}\text{N}_2\text{Se}$   $[\text{M}+\text{H}]^+$  349.02385, found: 349.02347.

# $^1\text{H}$ , $^{13}\text{C}$ NMR, and $^{19}\text{F}$ NMR Spectra for Products

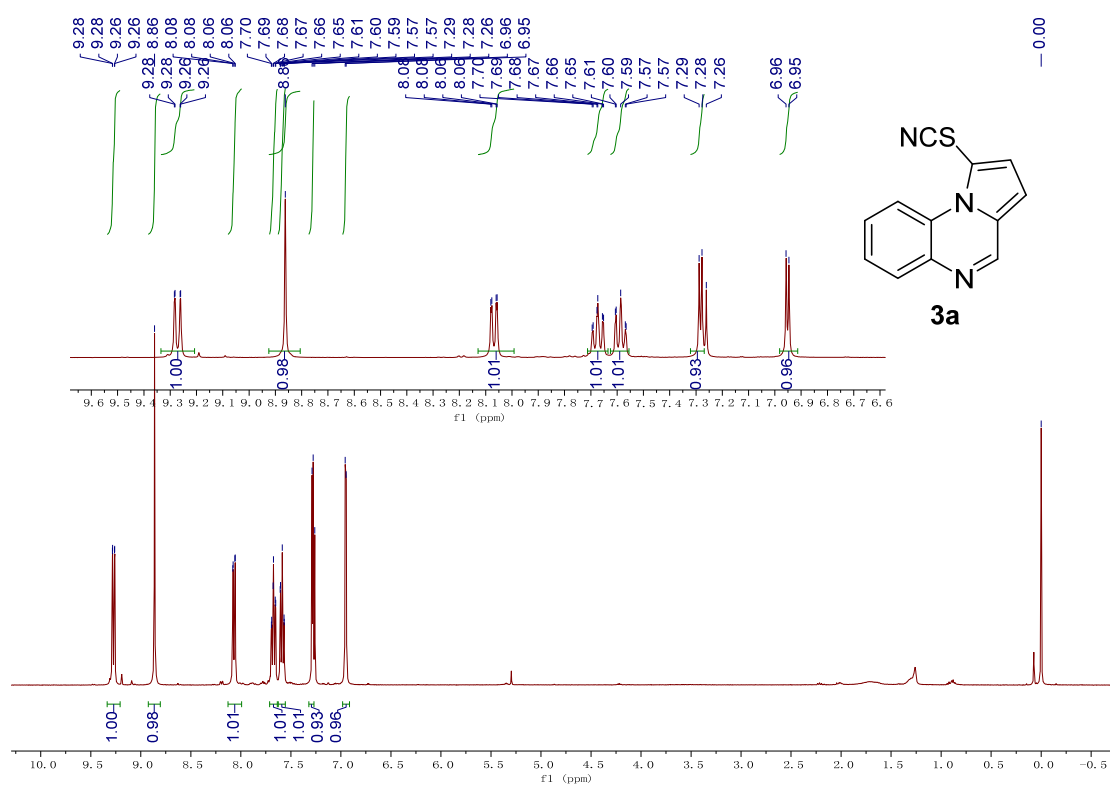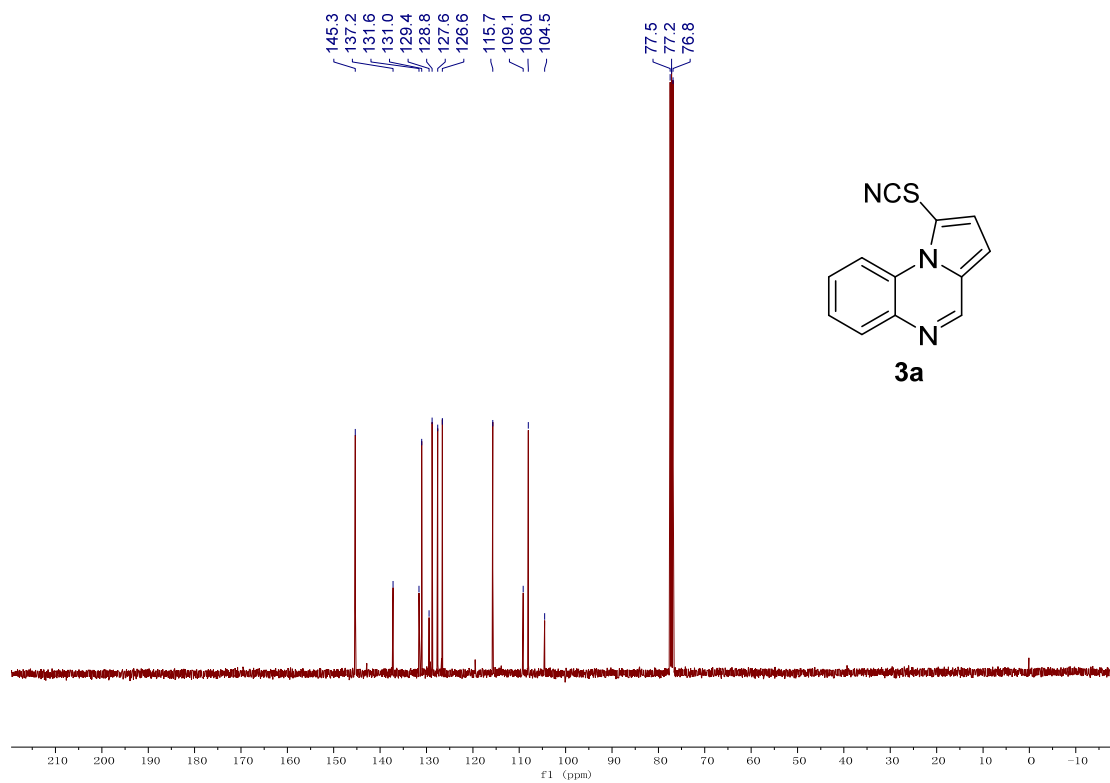

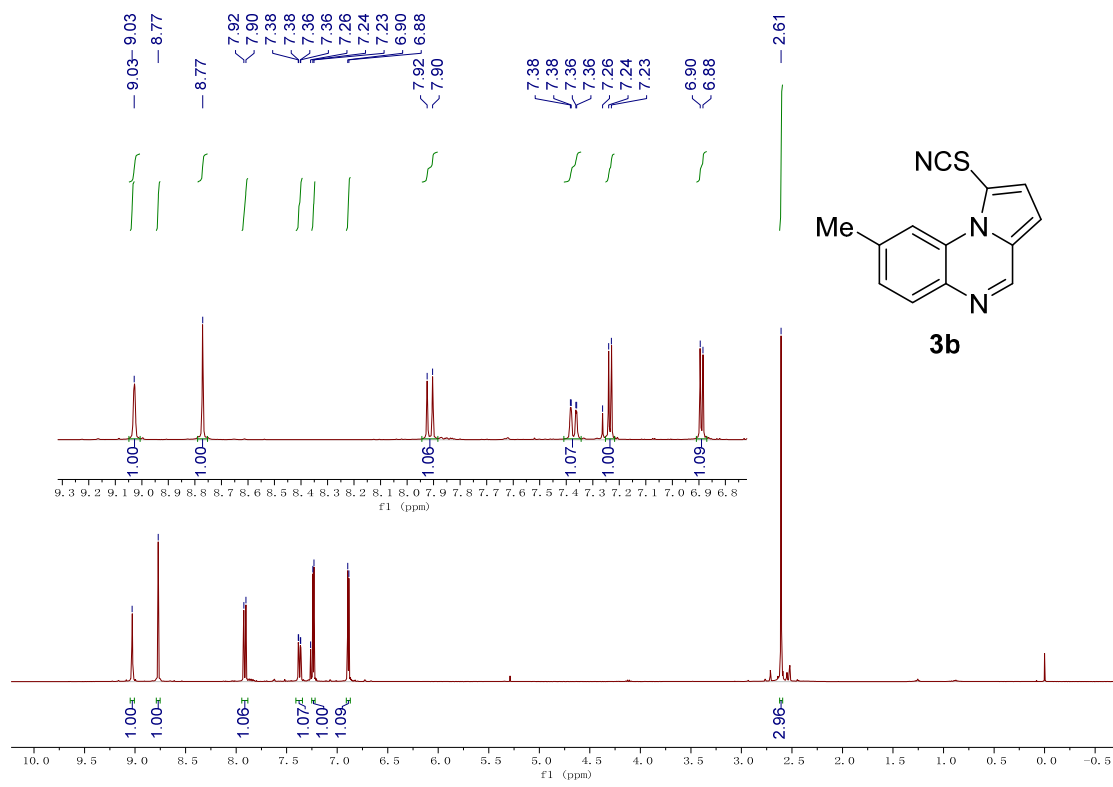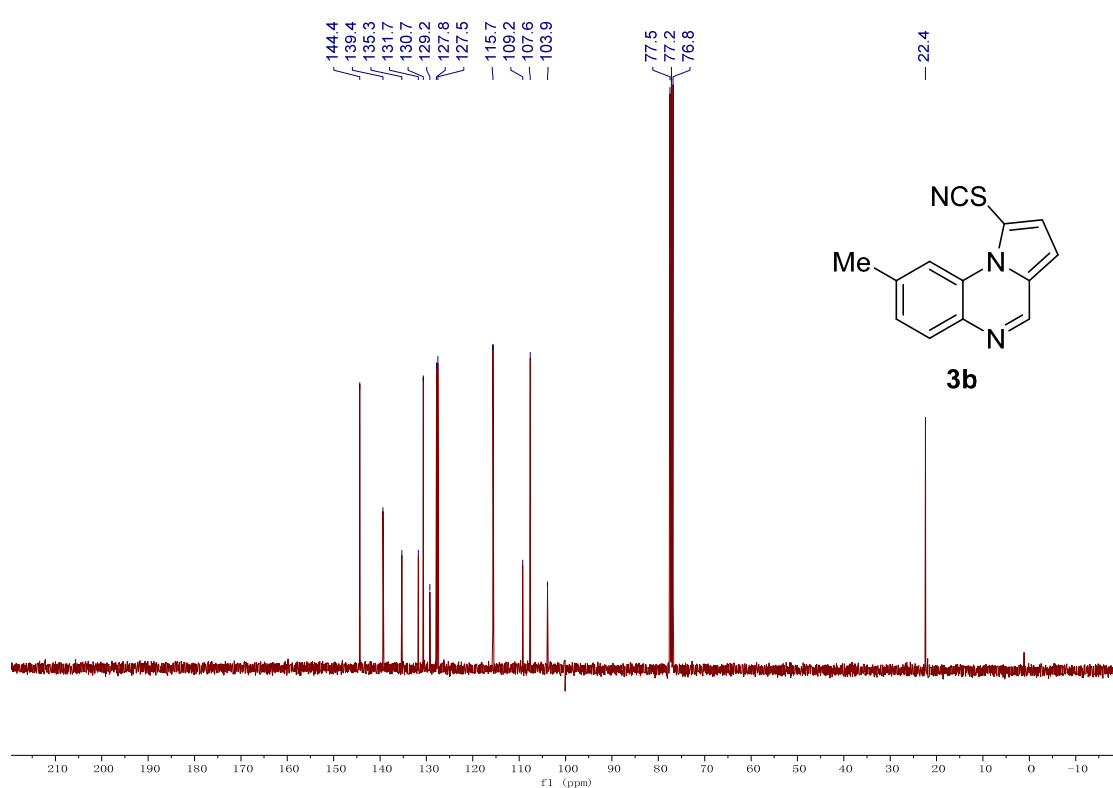

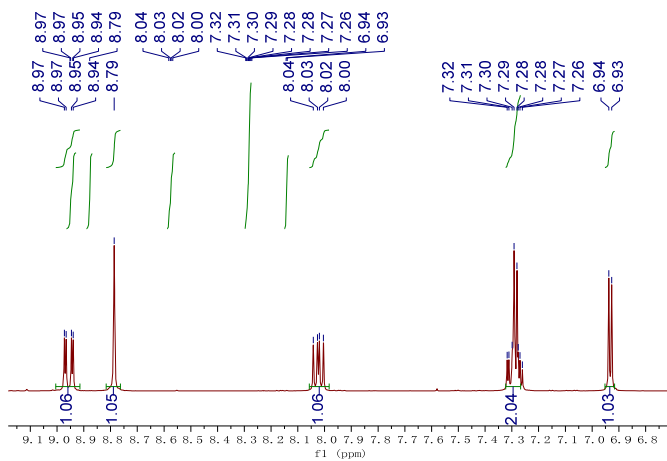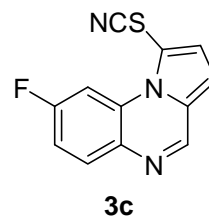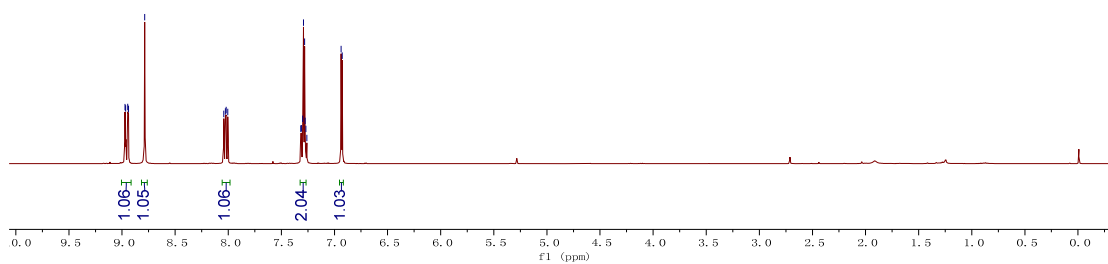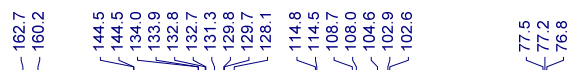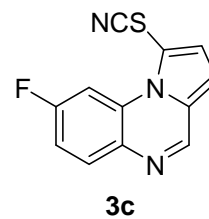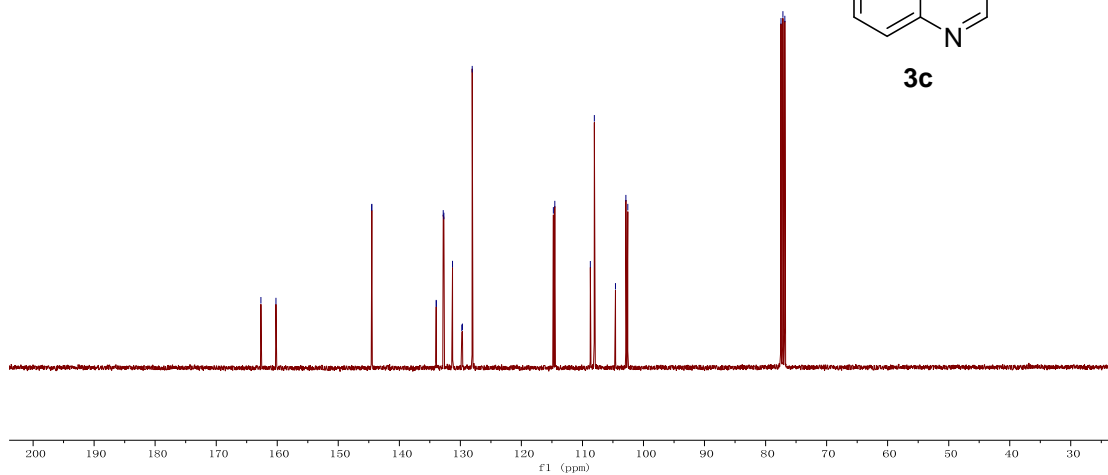

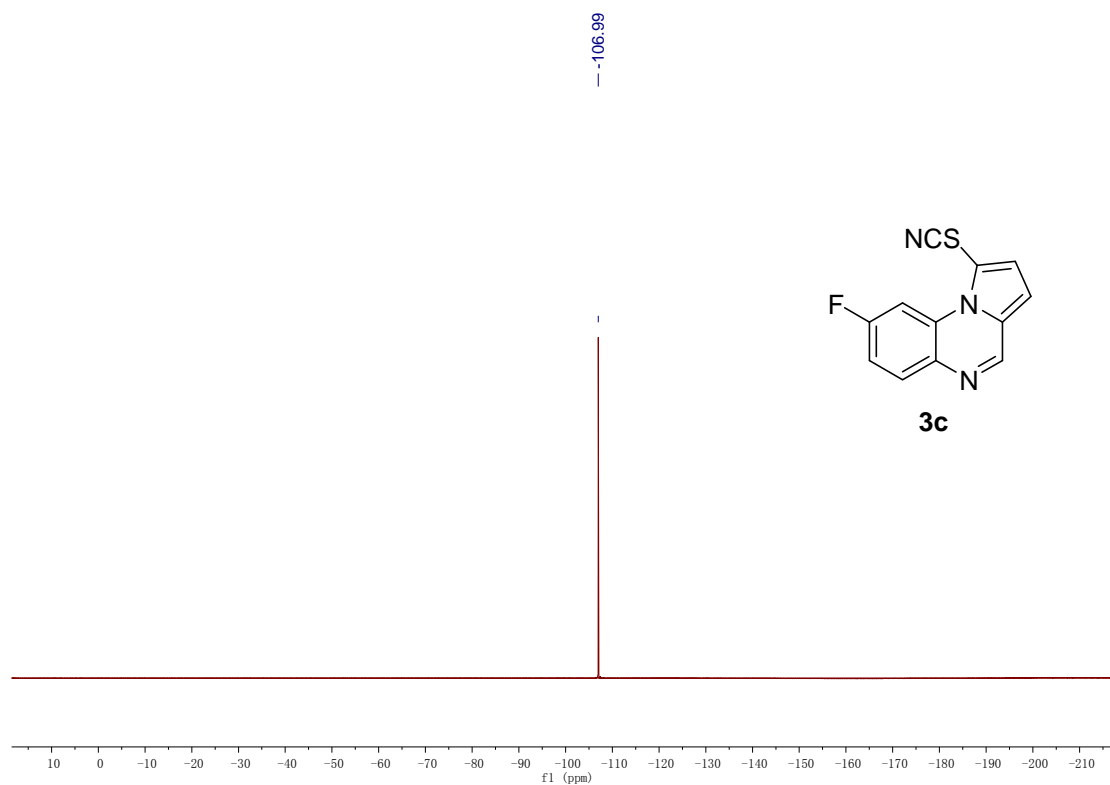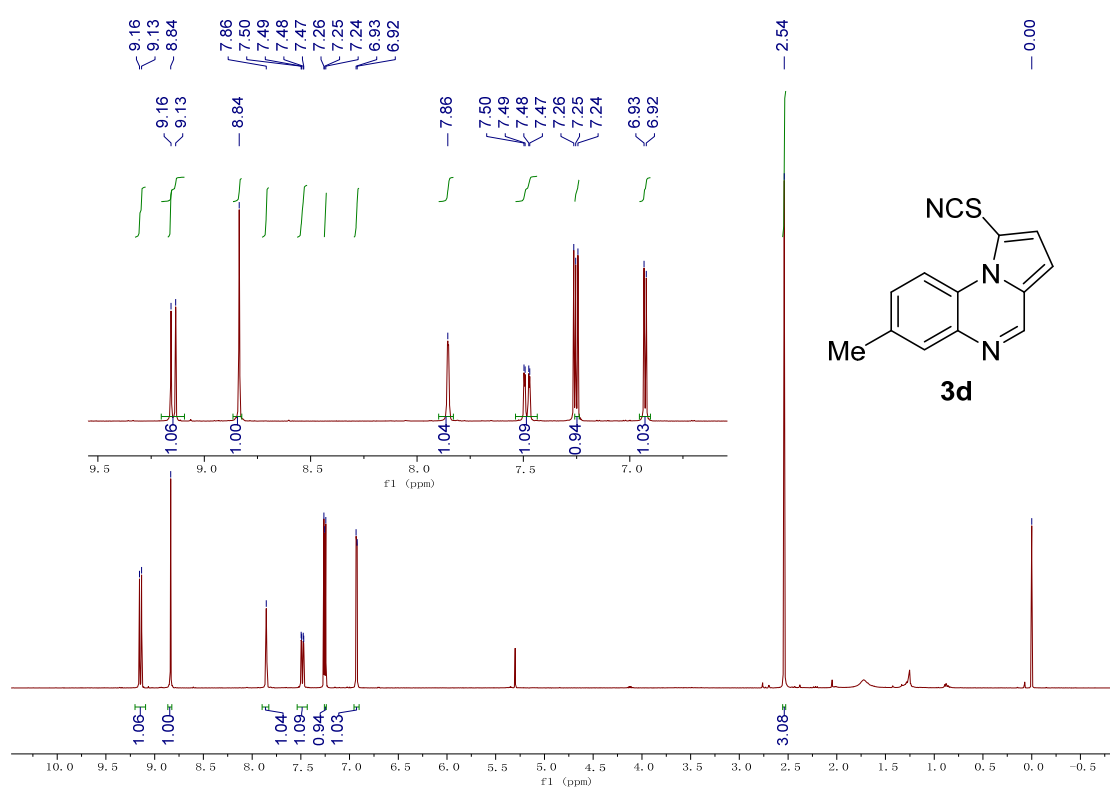



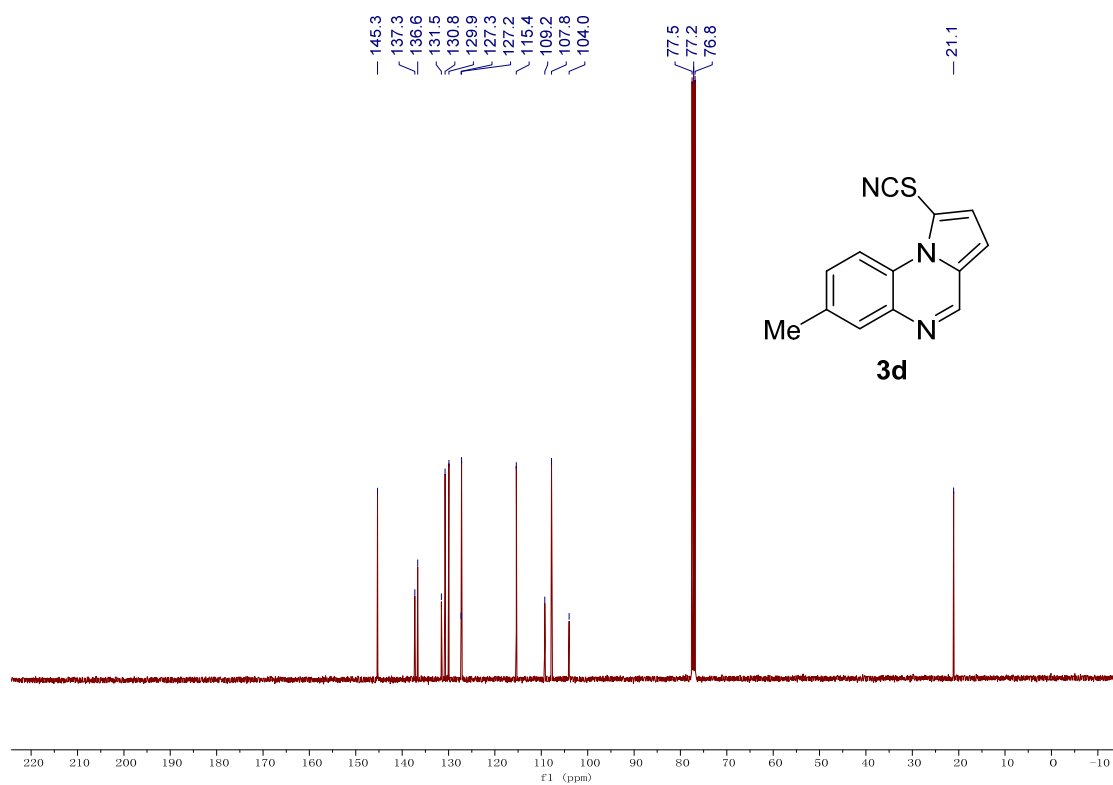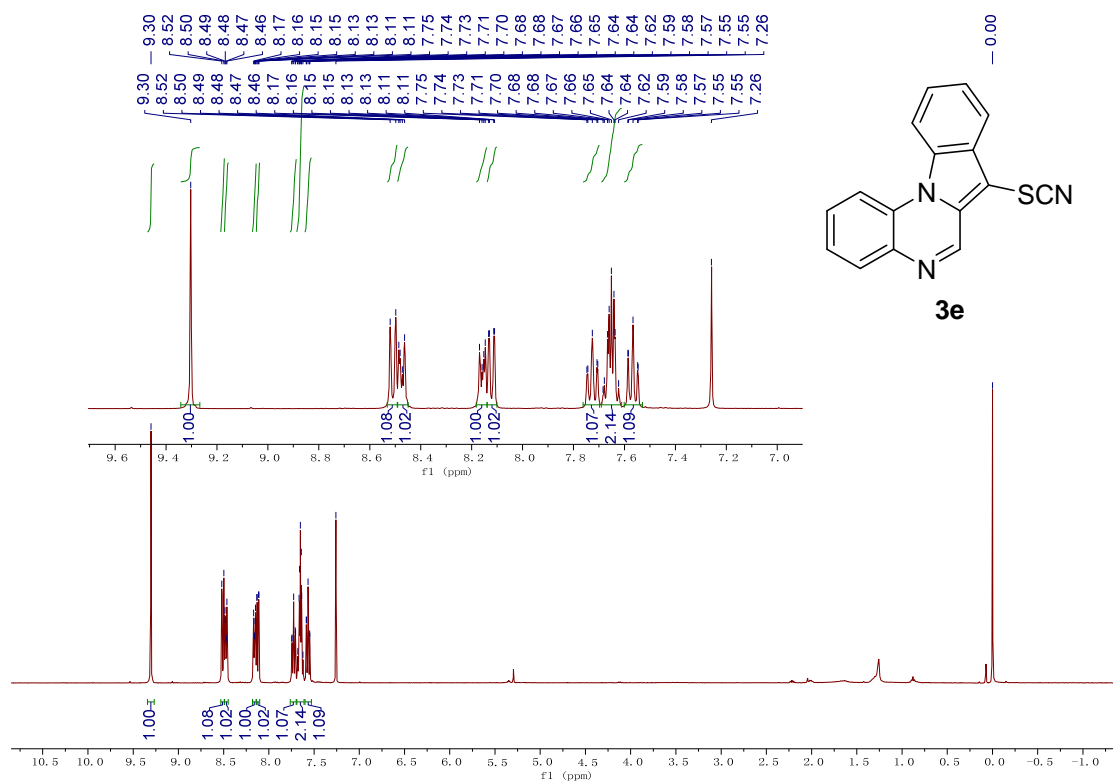



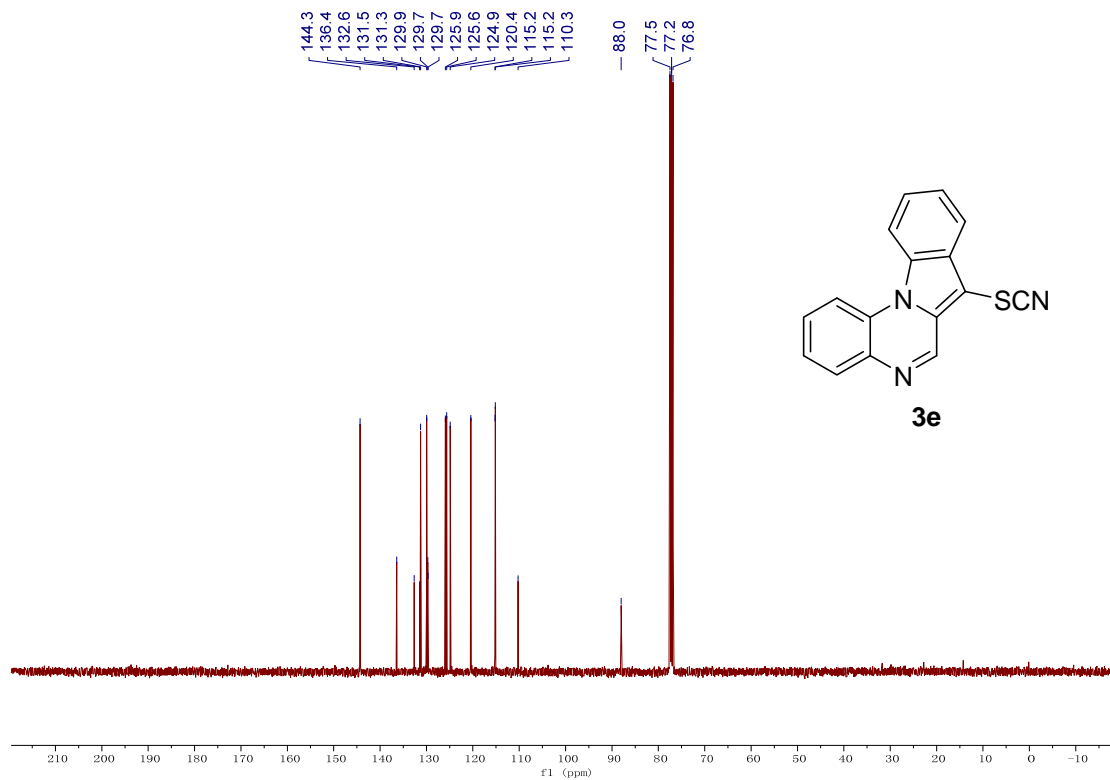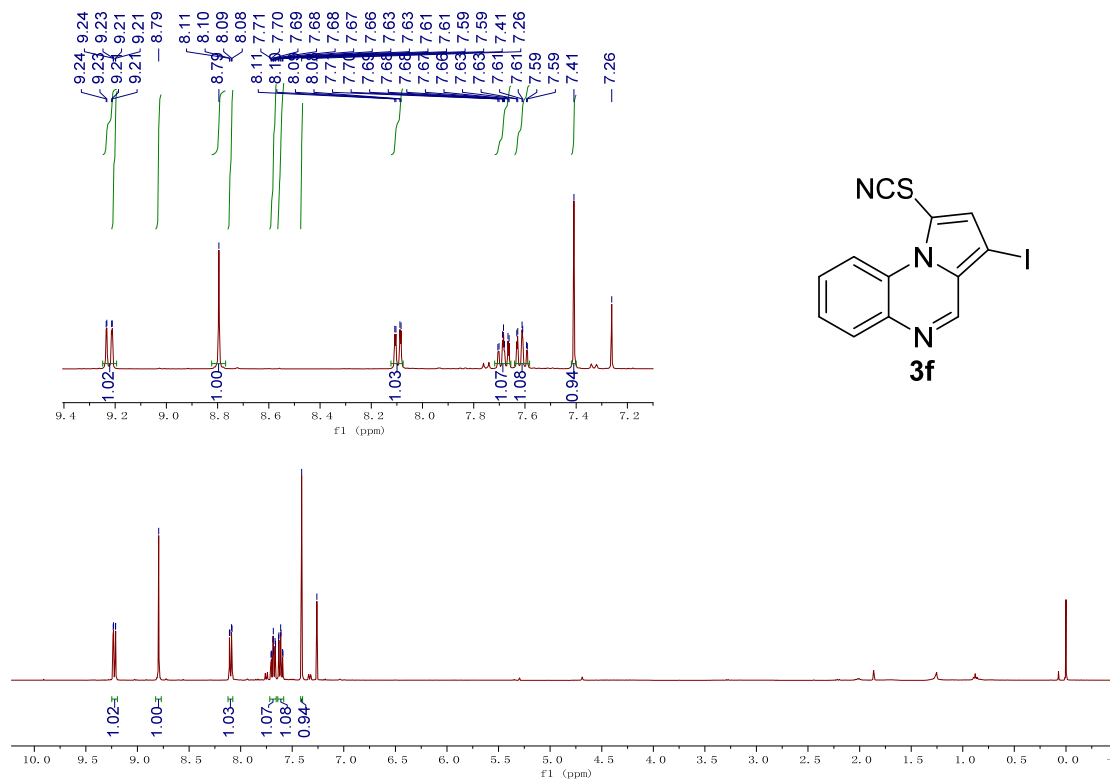

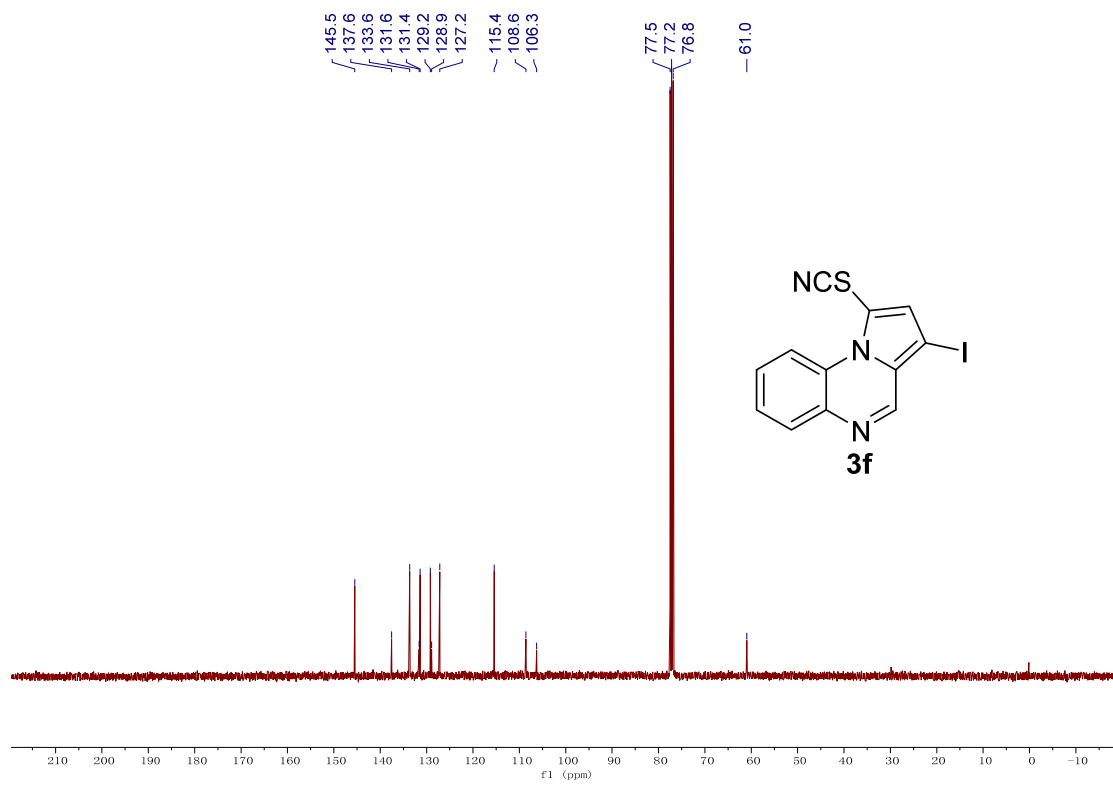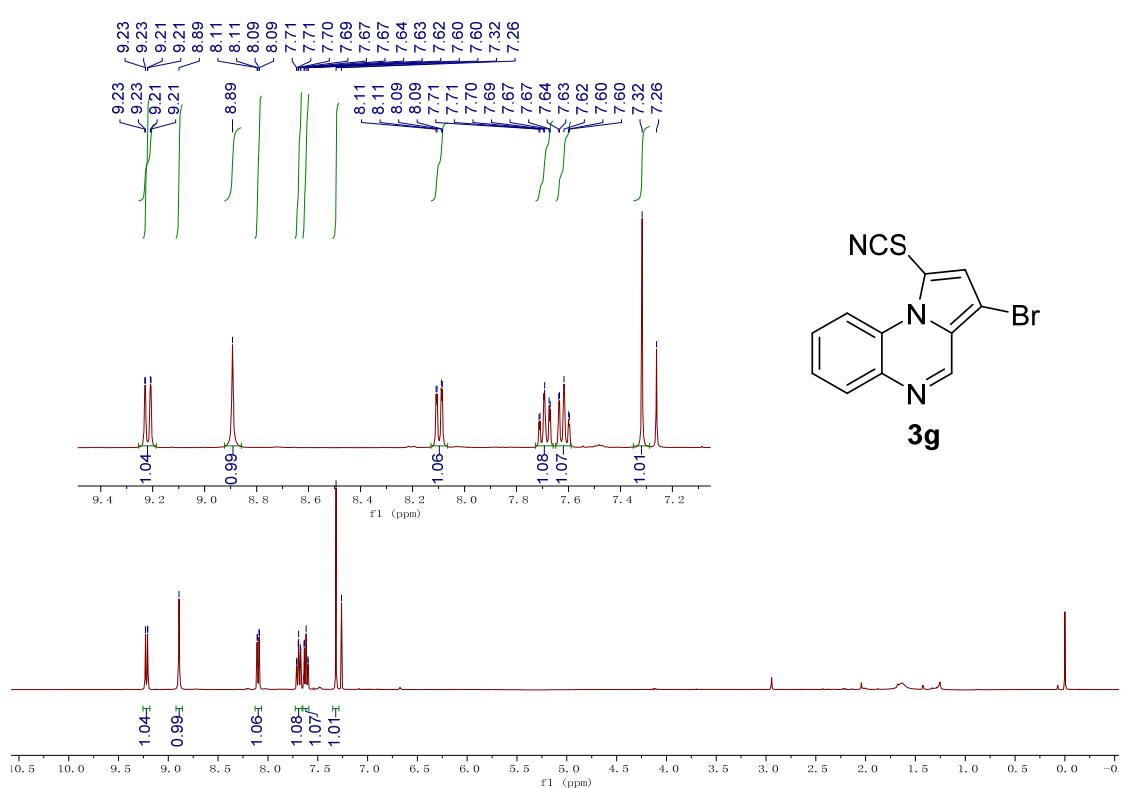

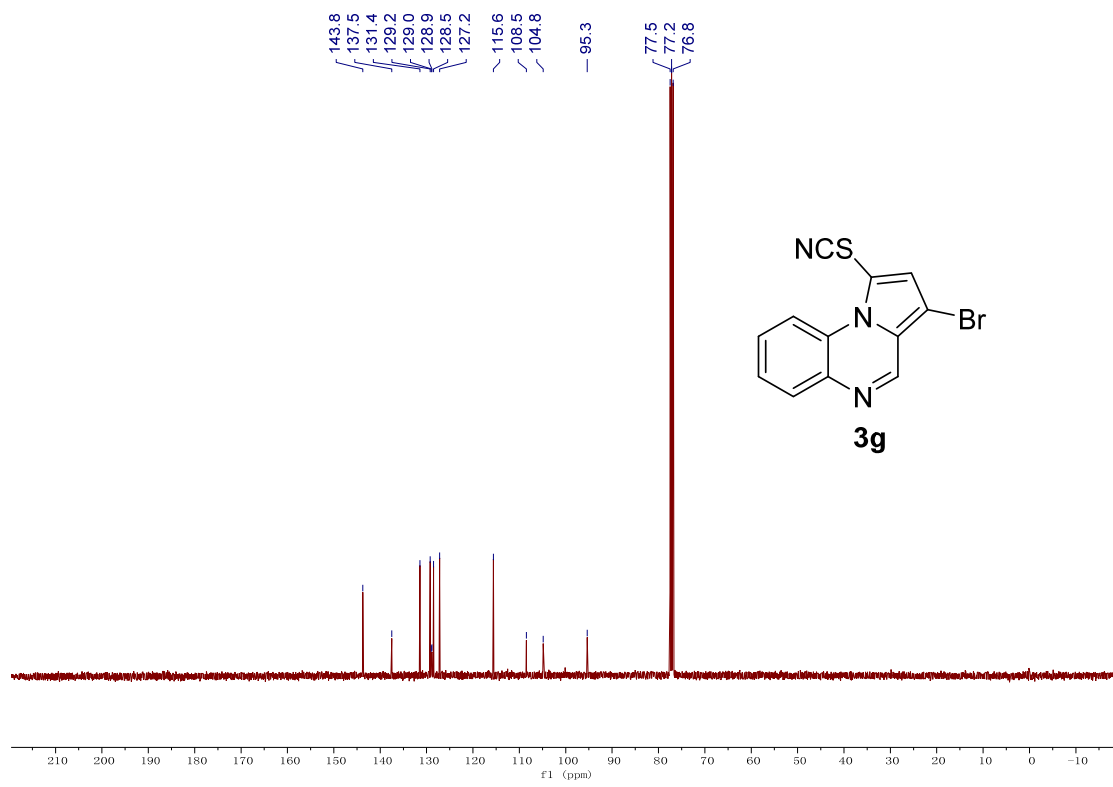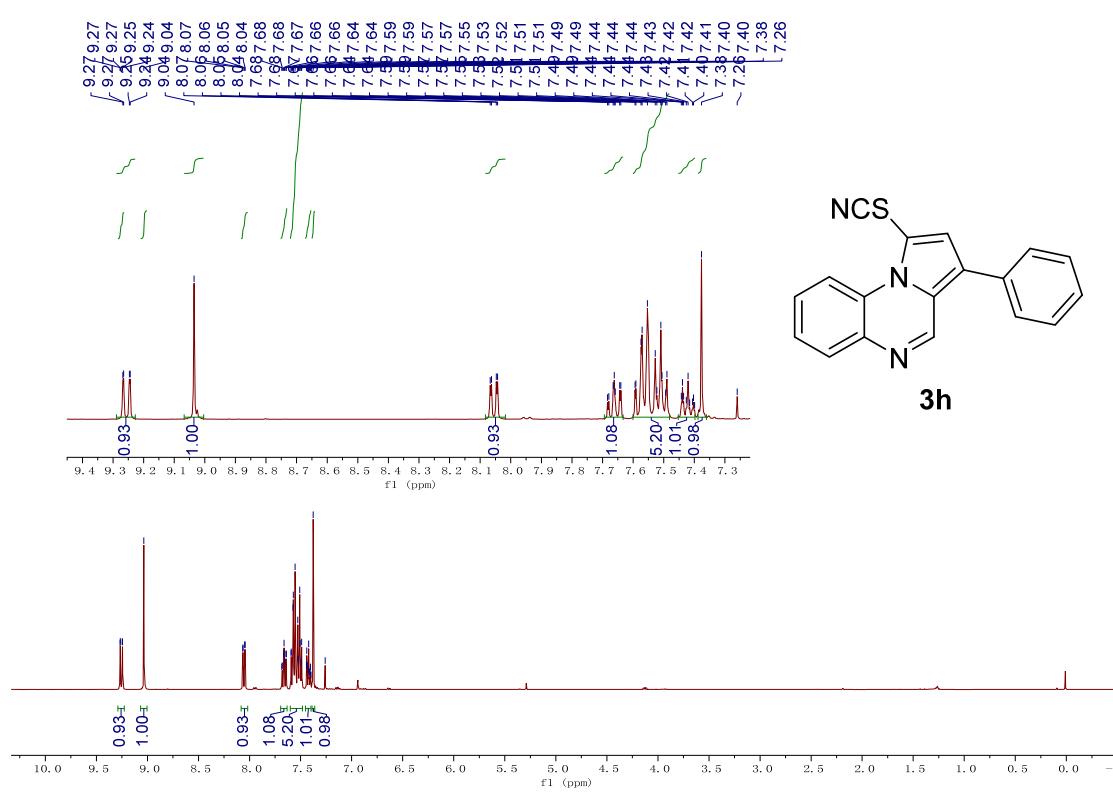

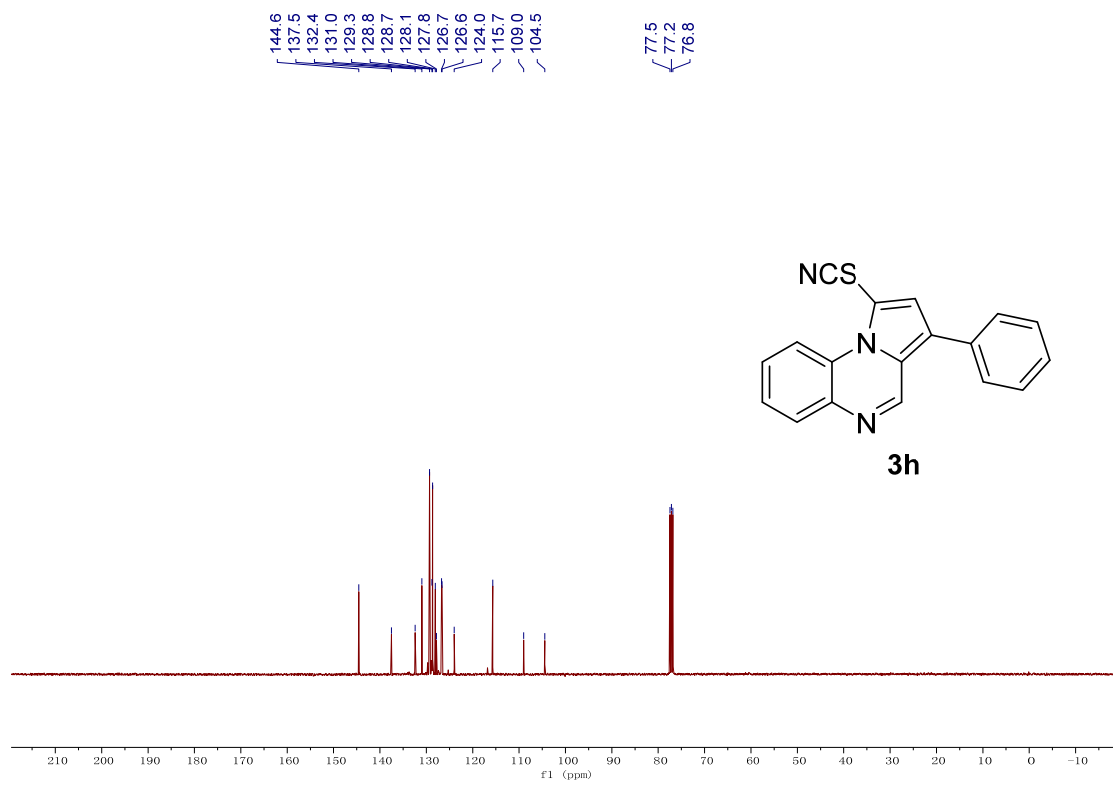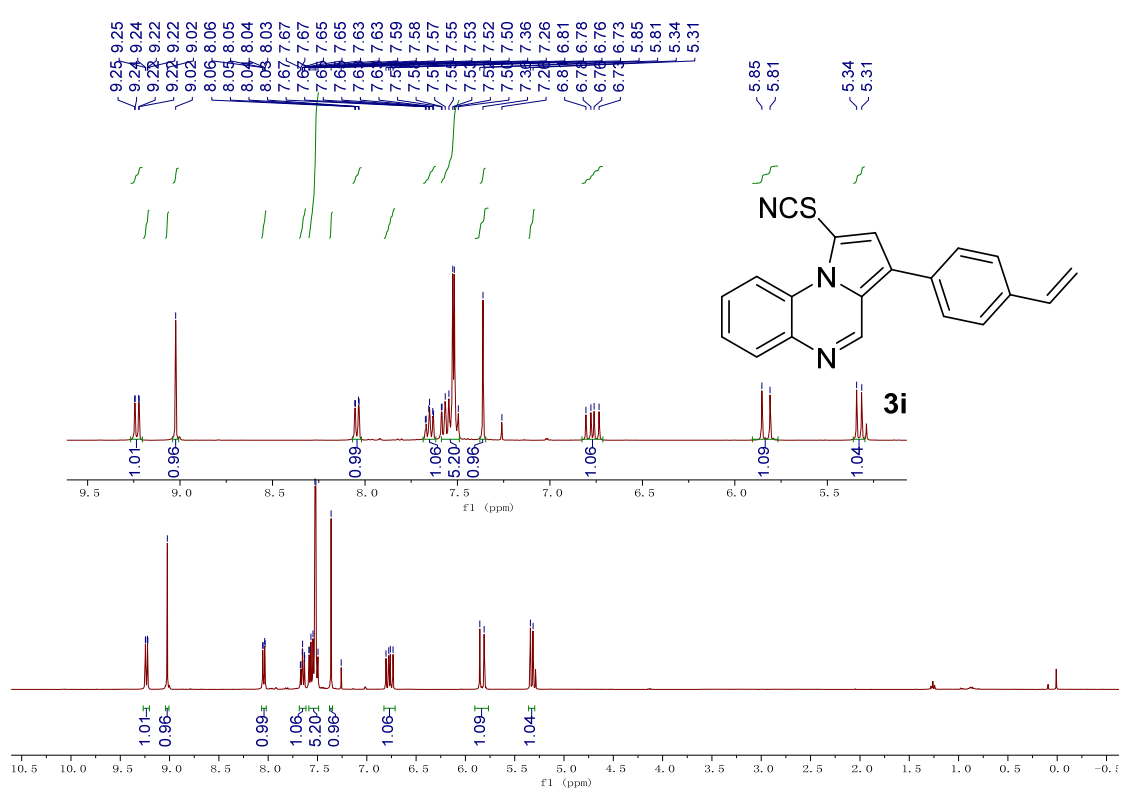

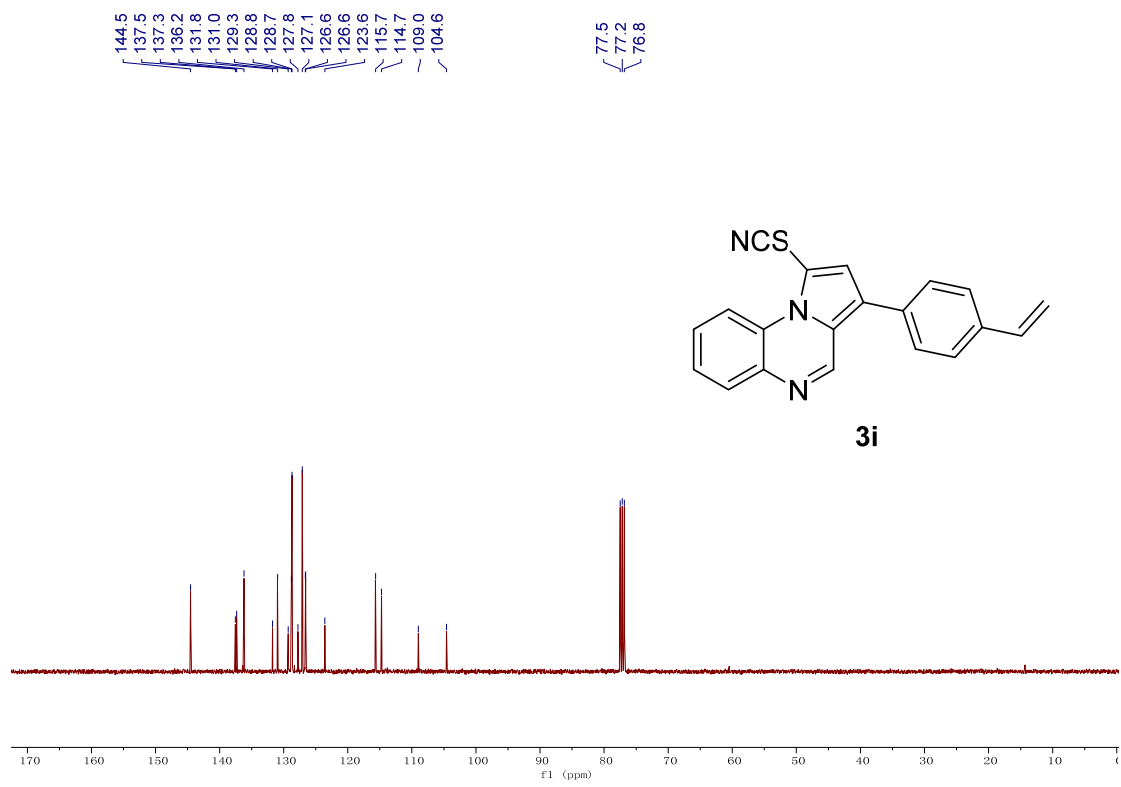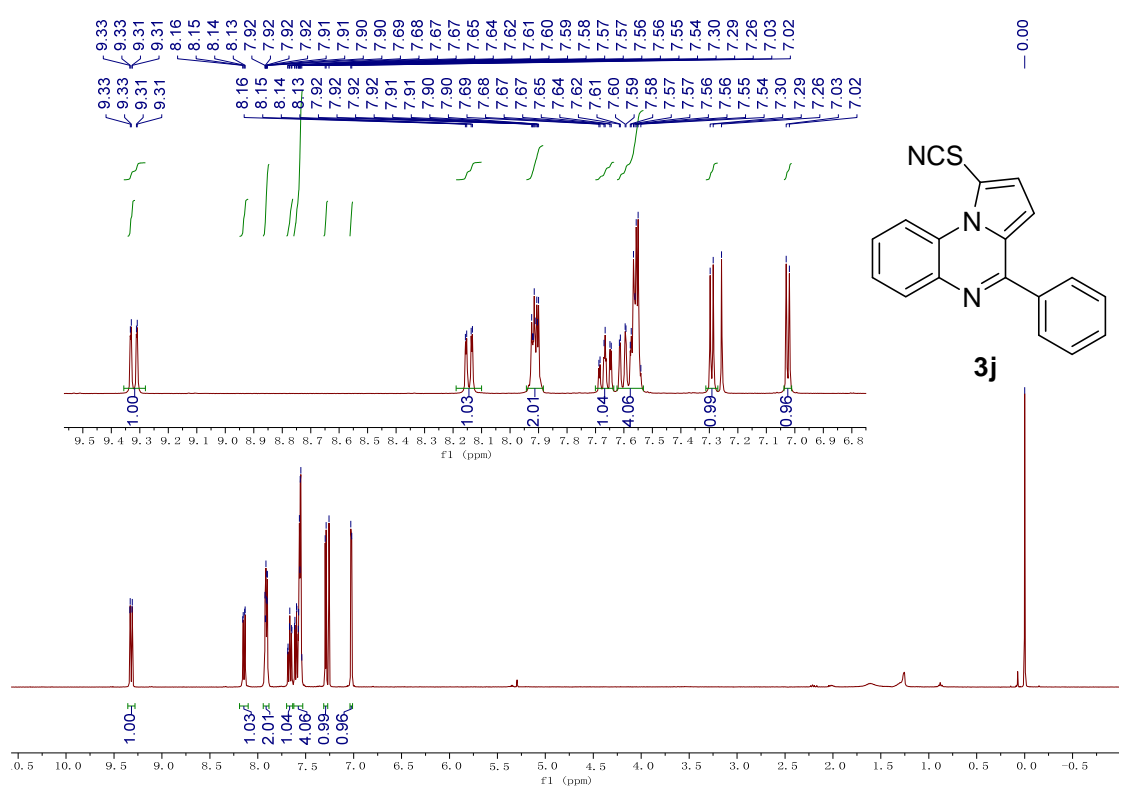





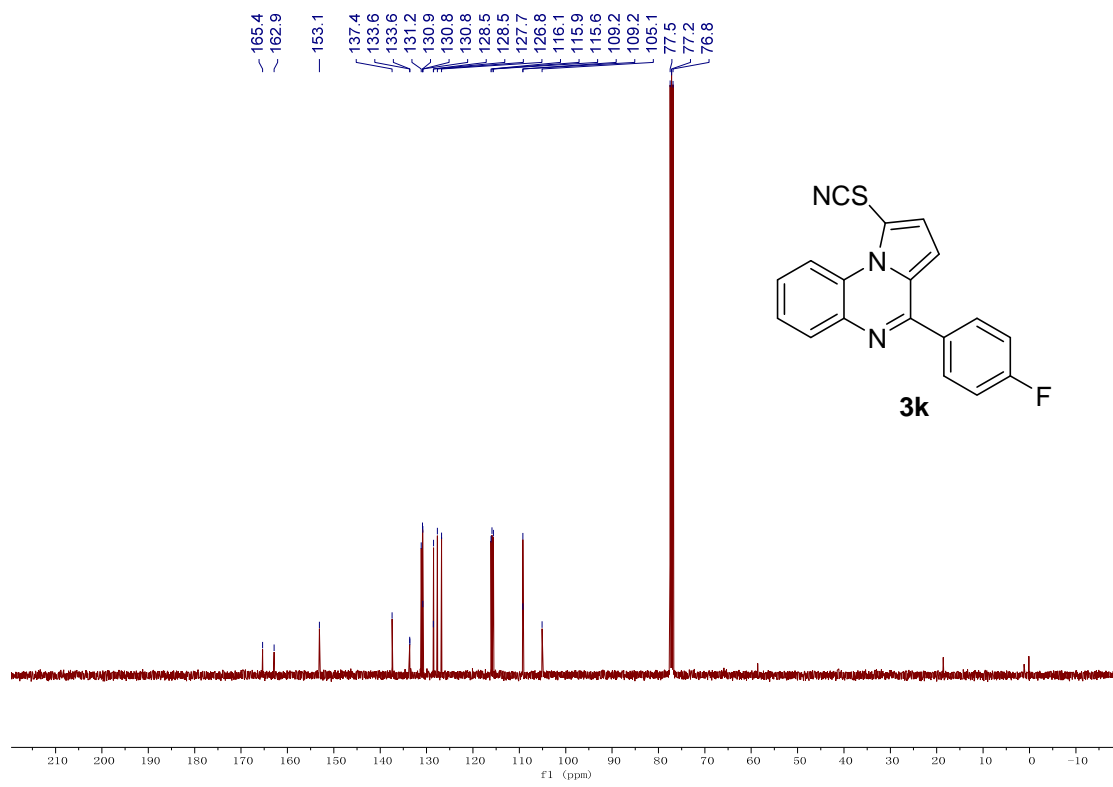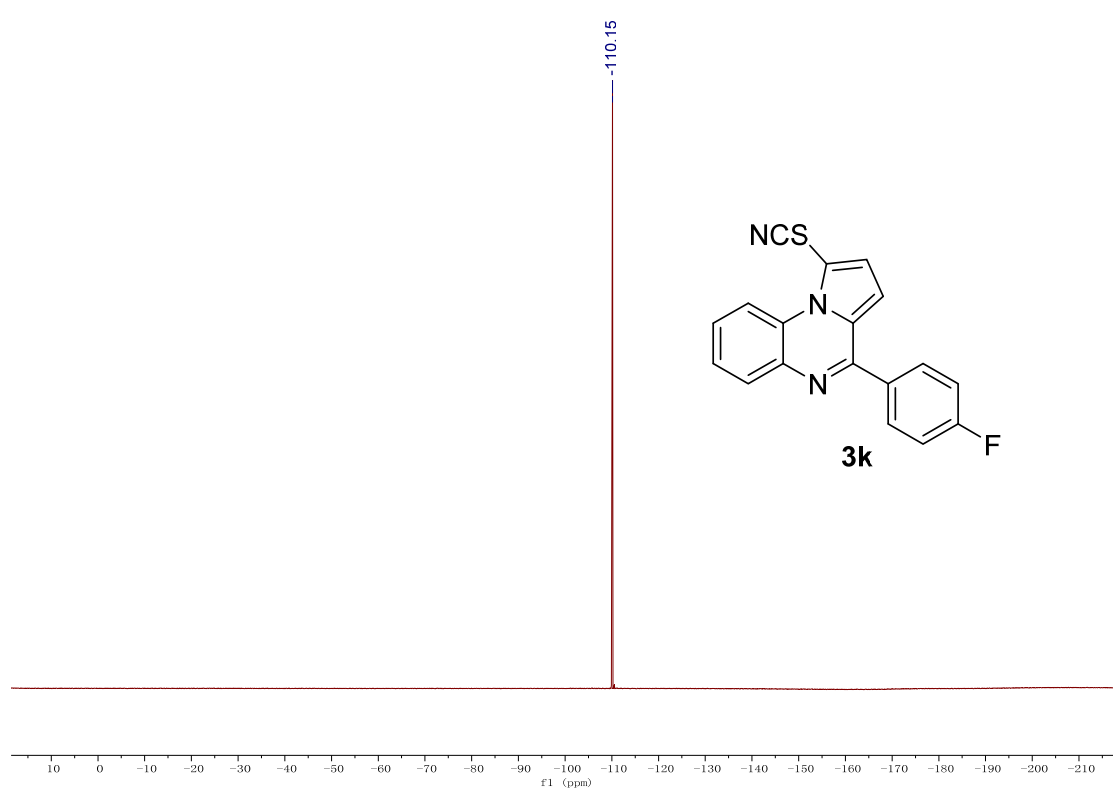

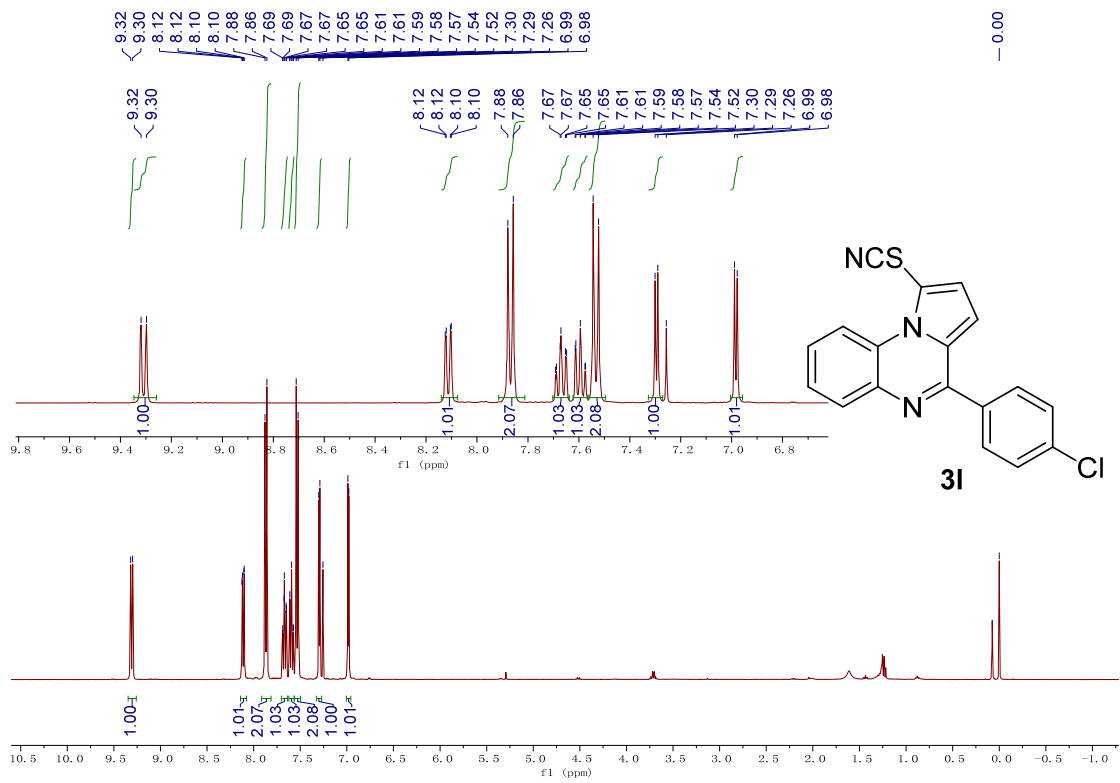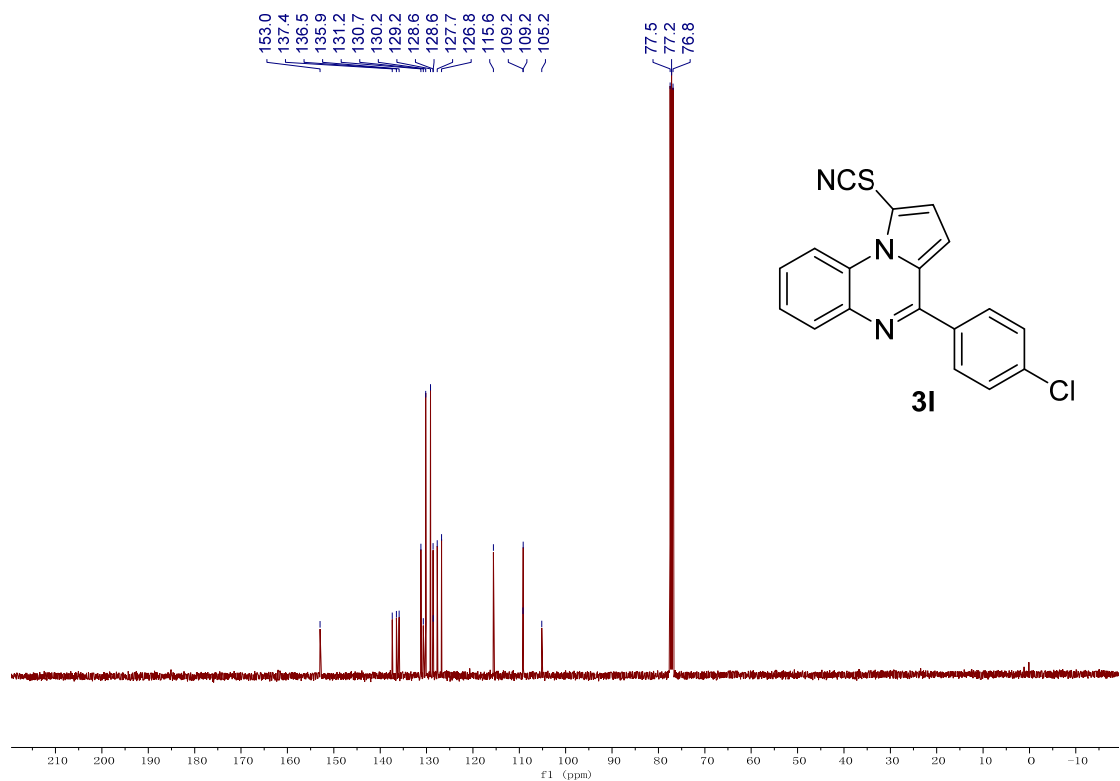

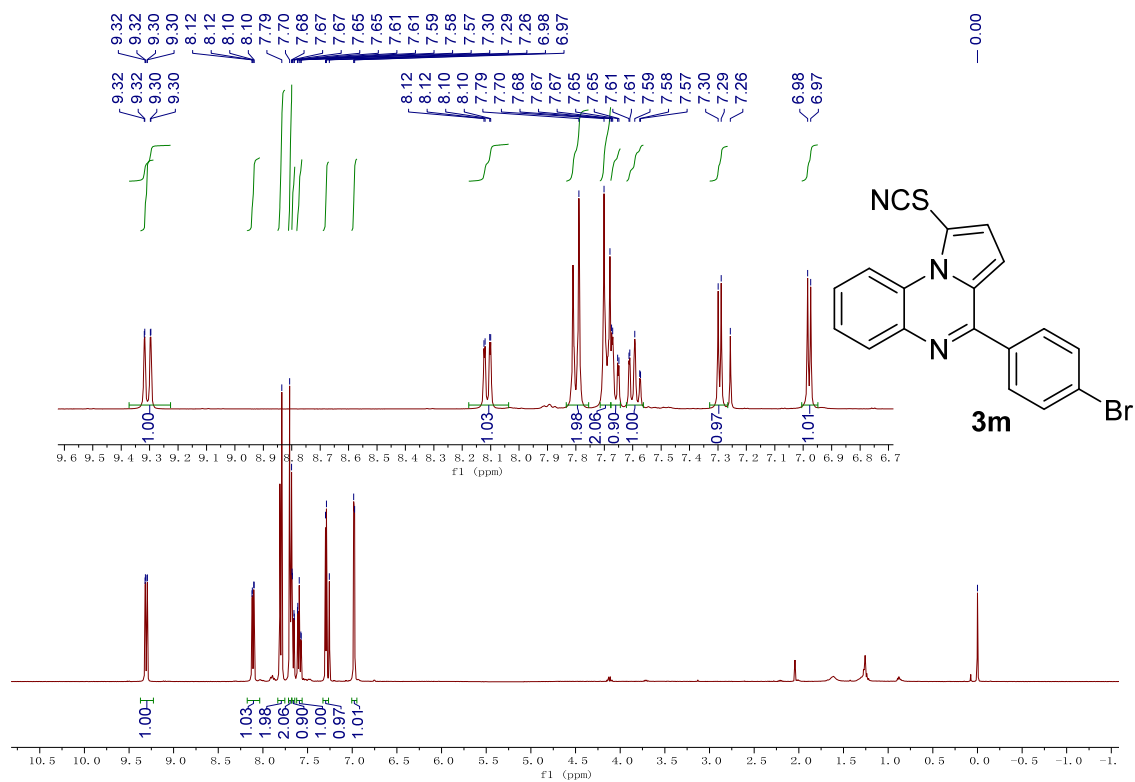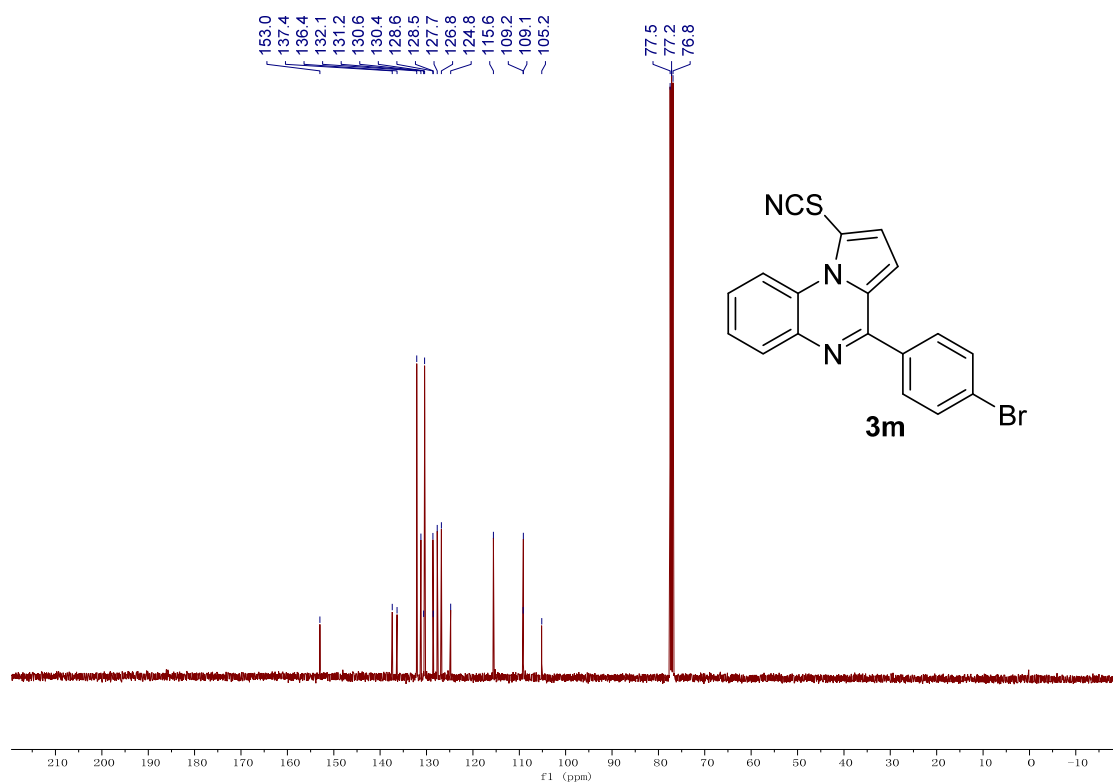

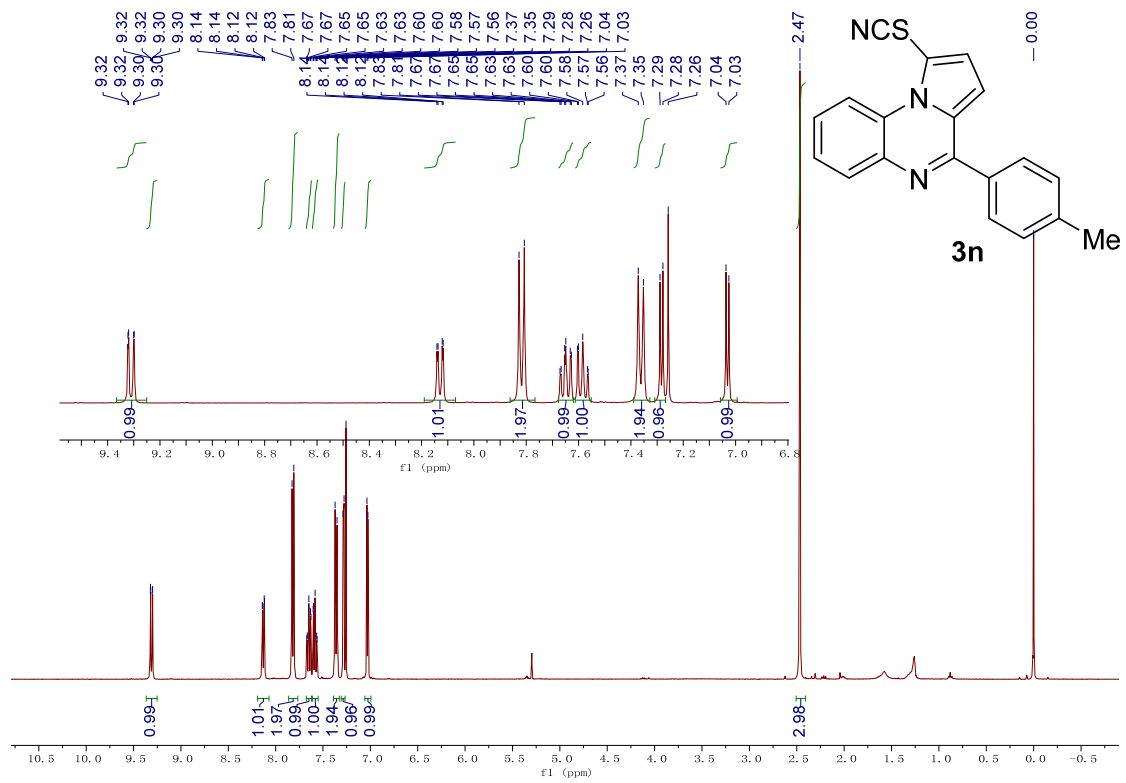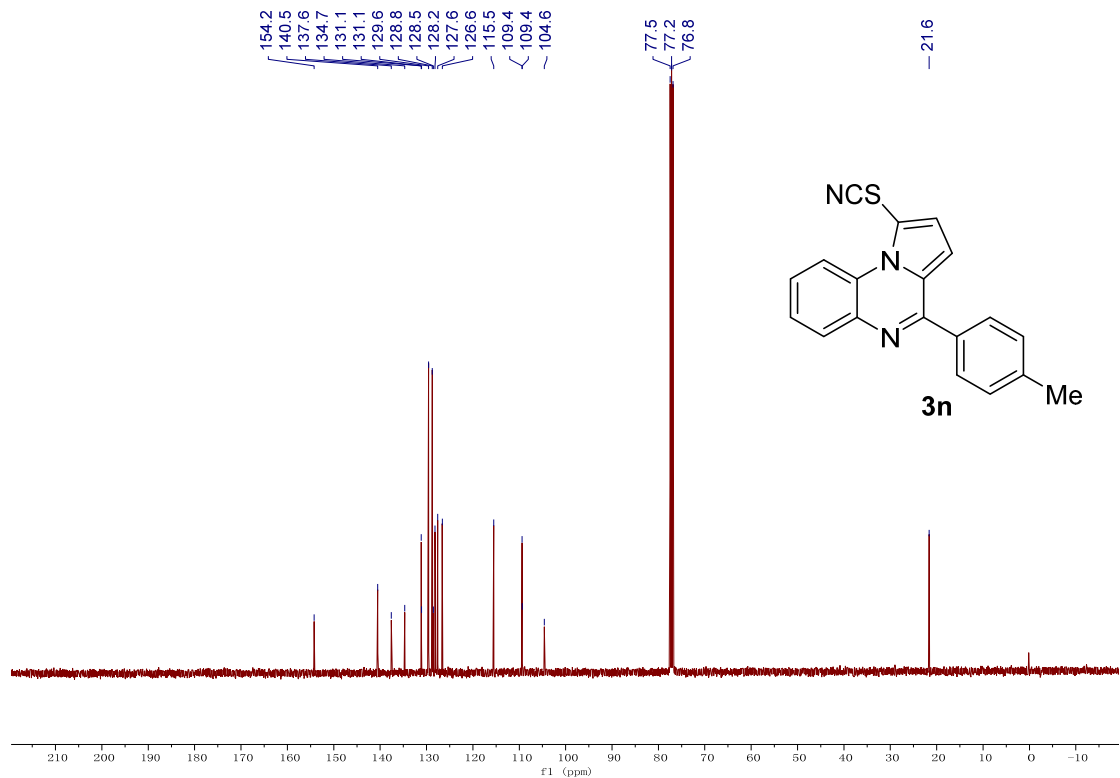

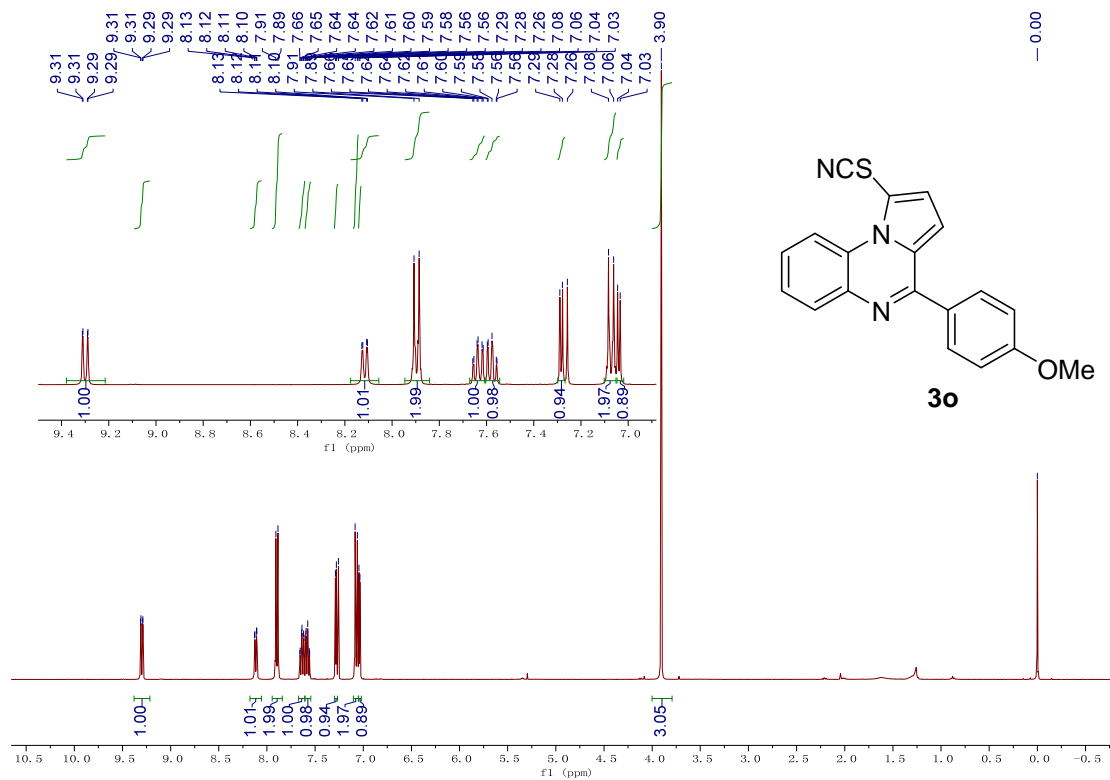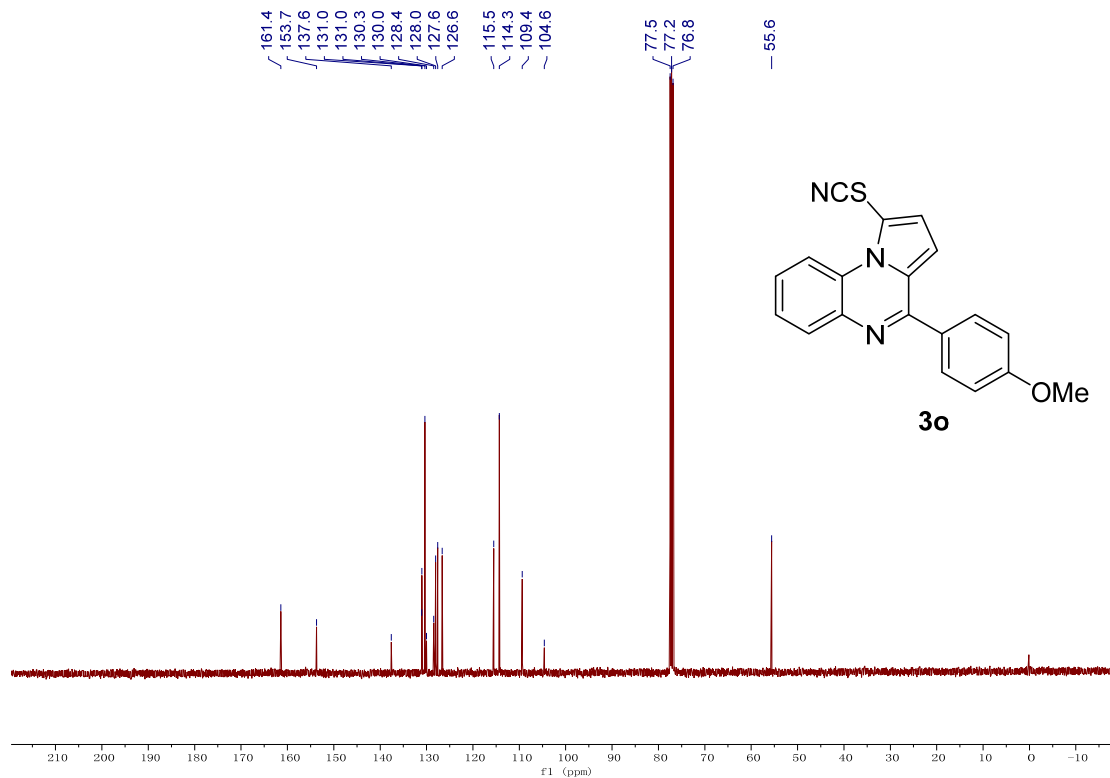

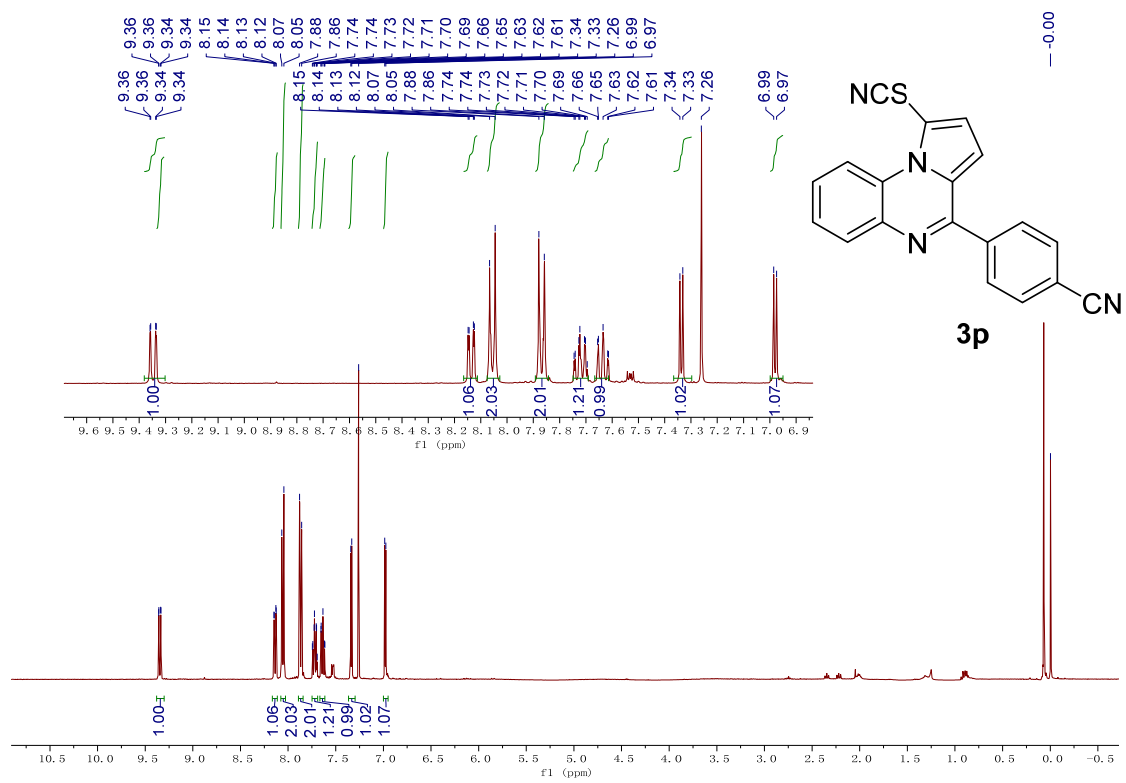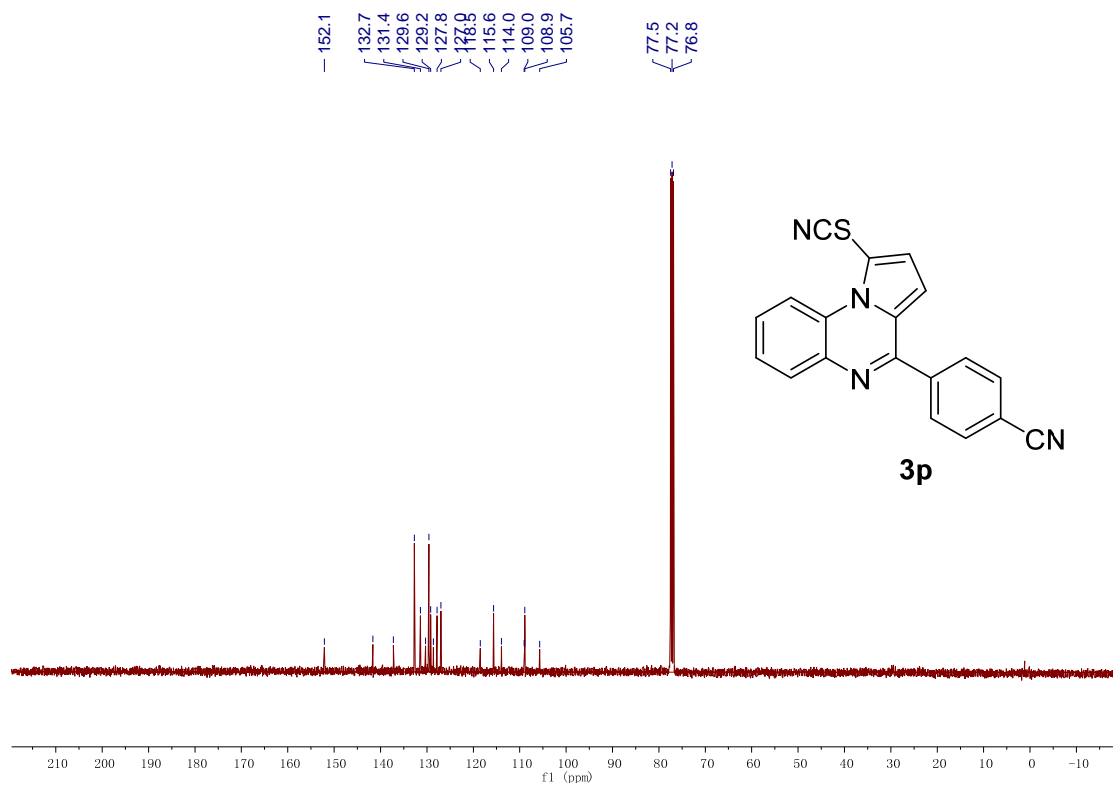







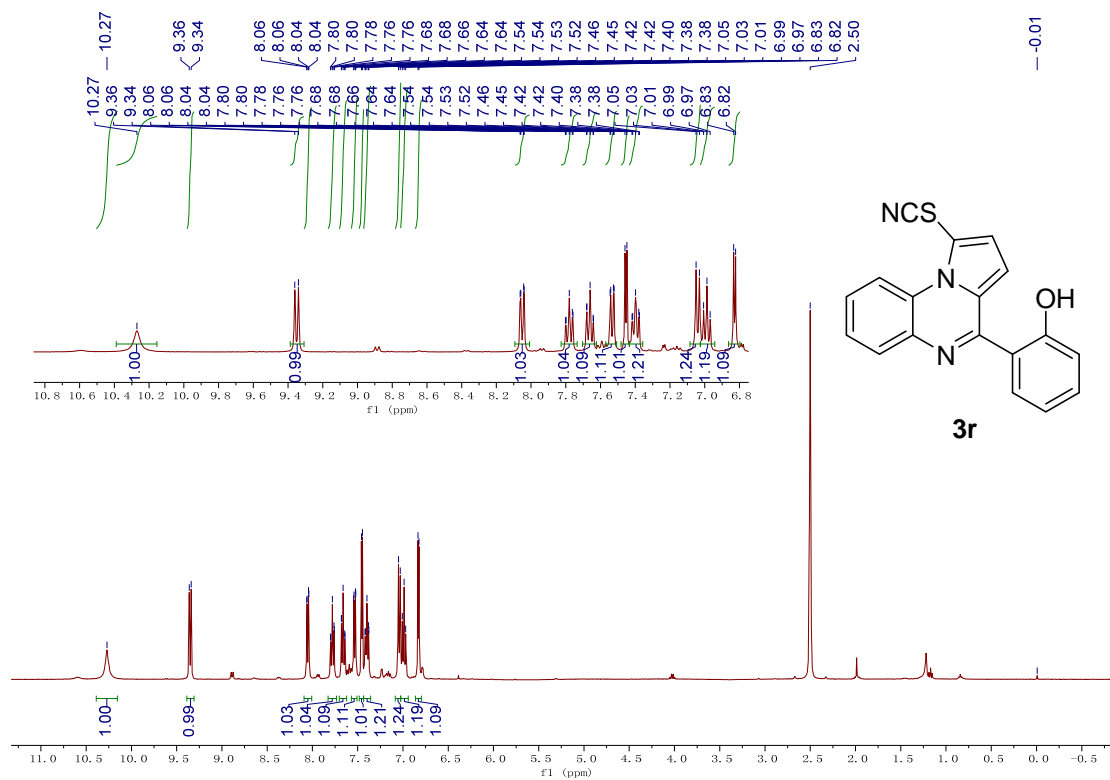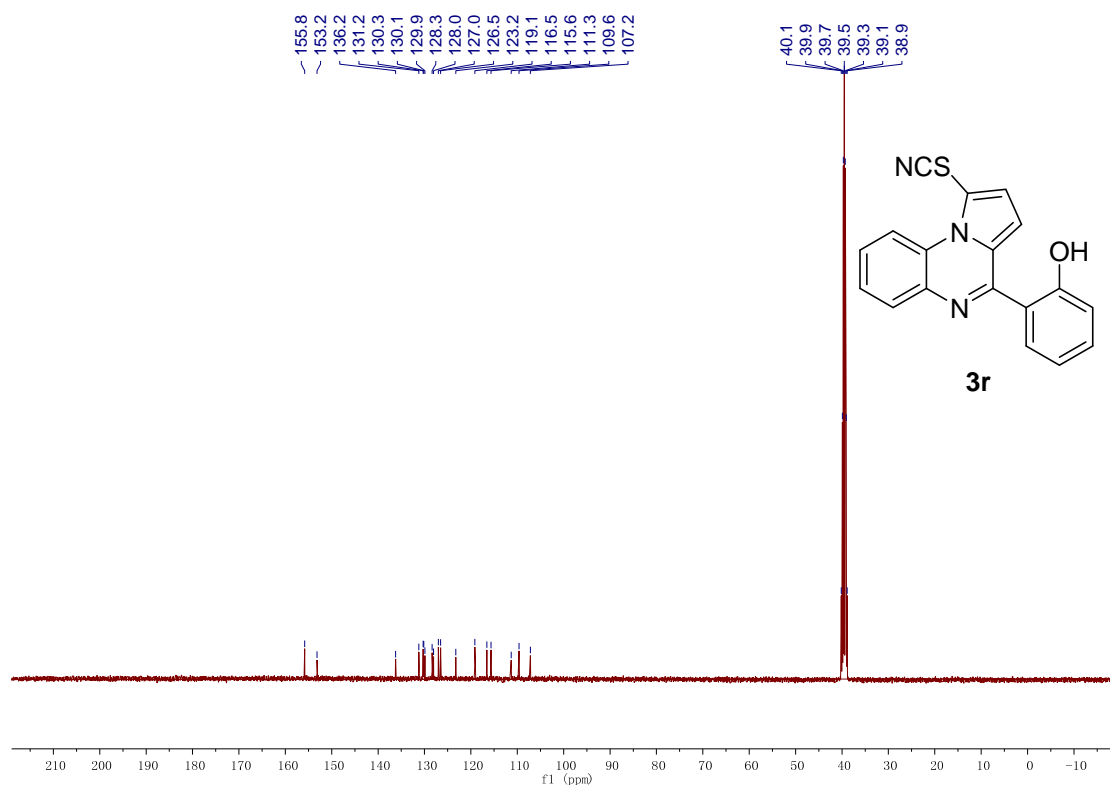

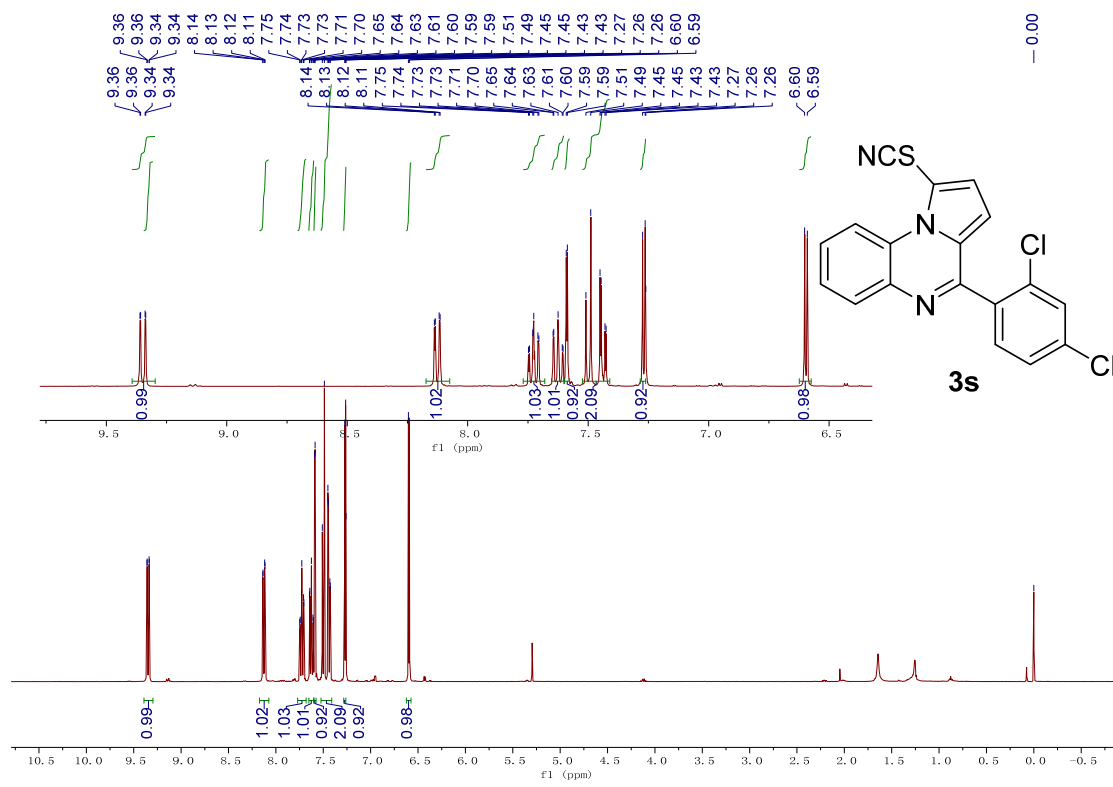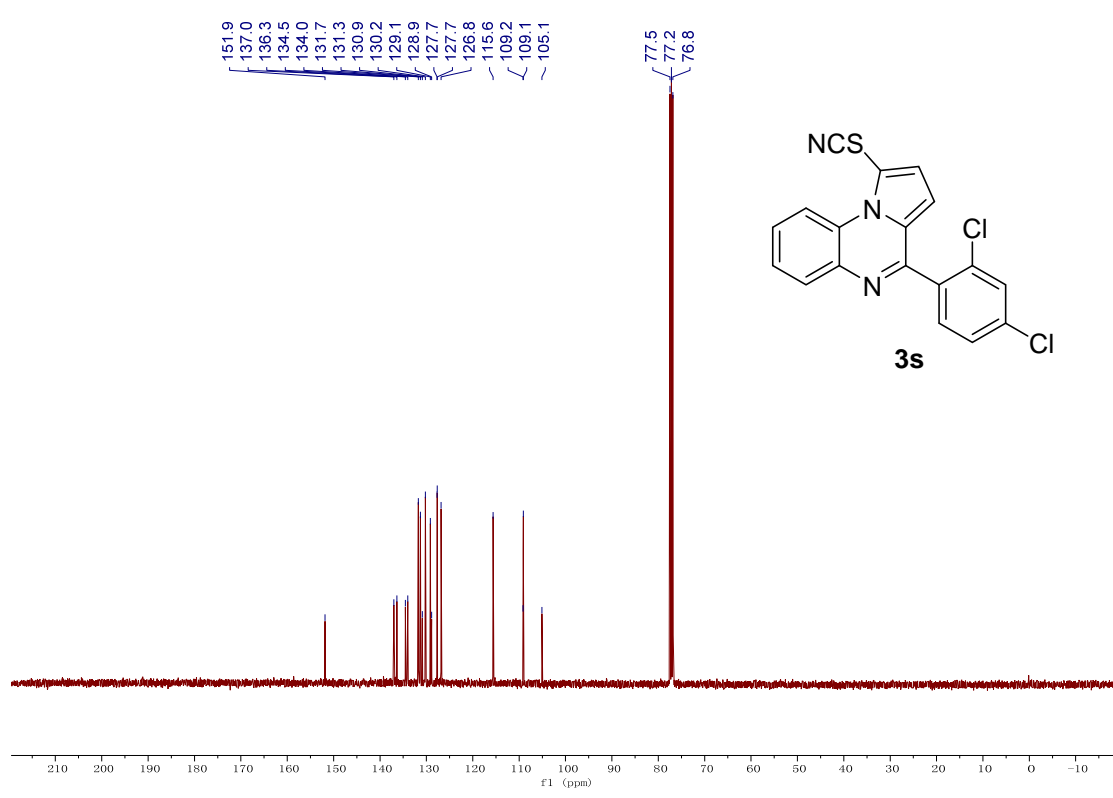

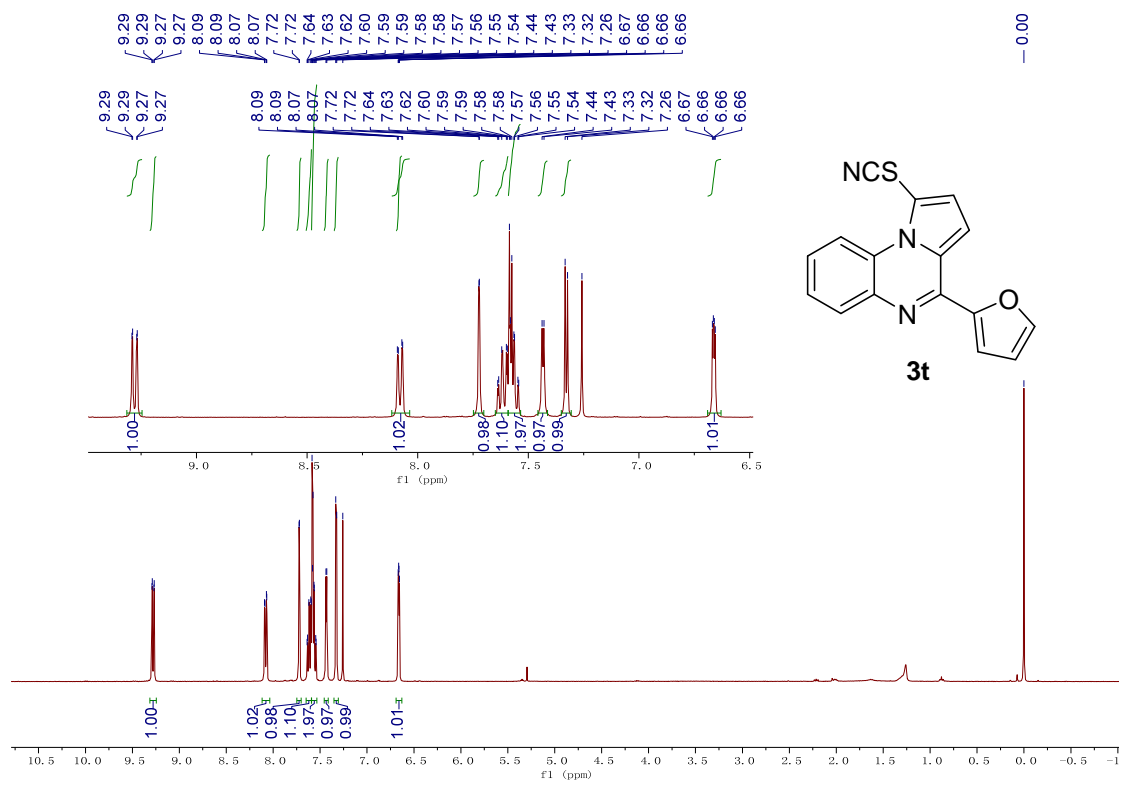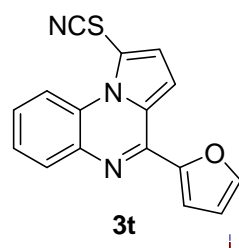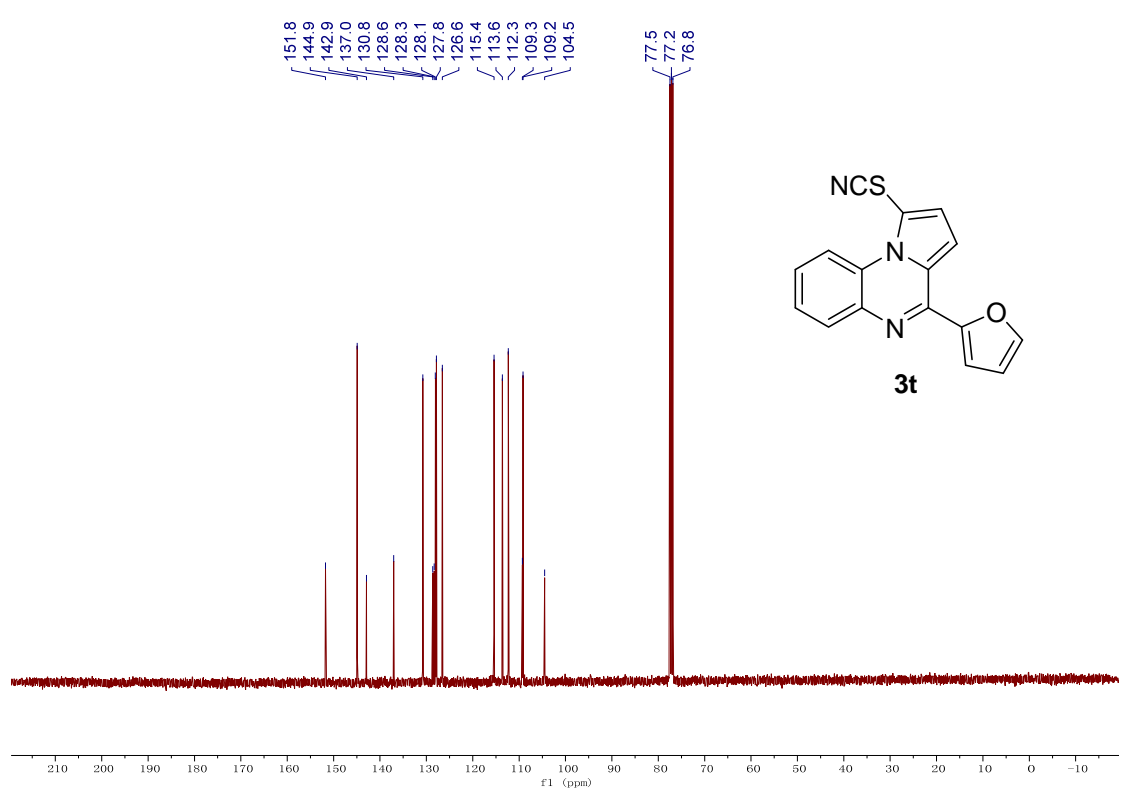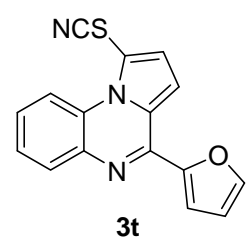

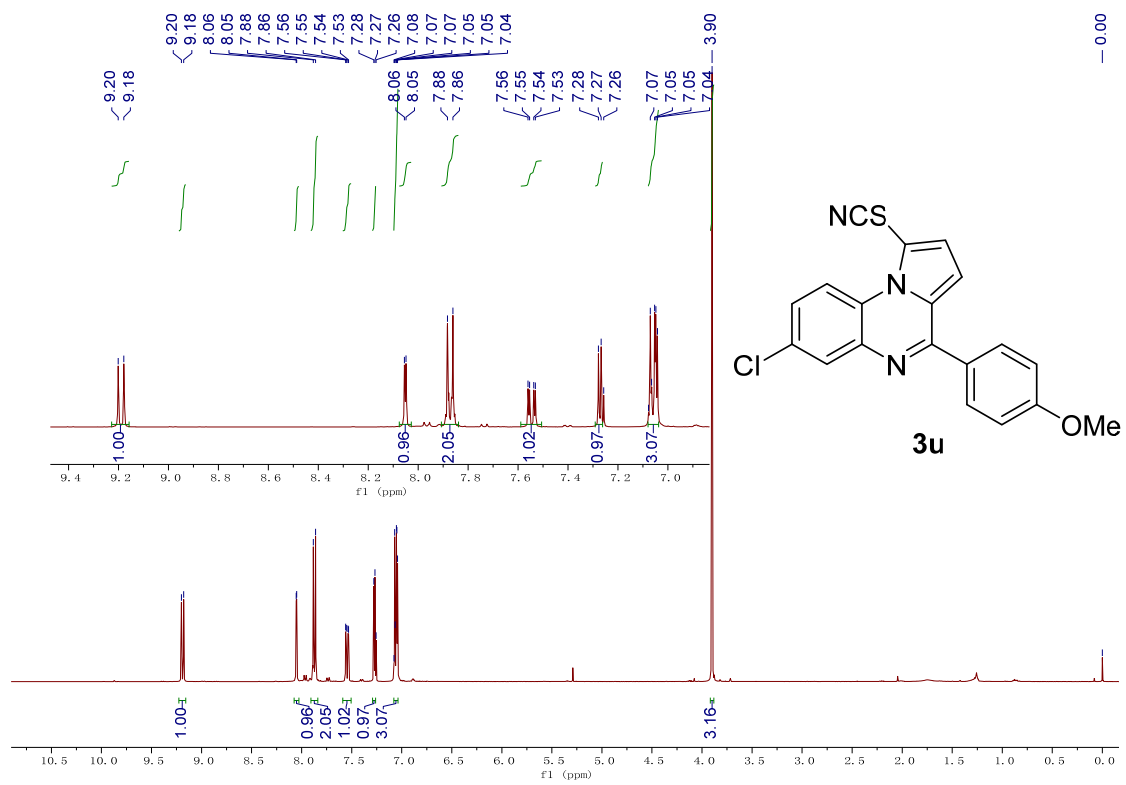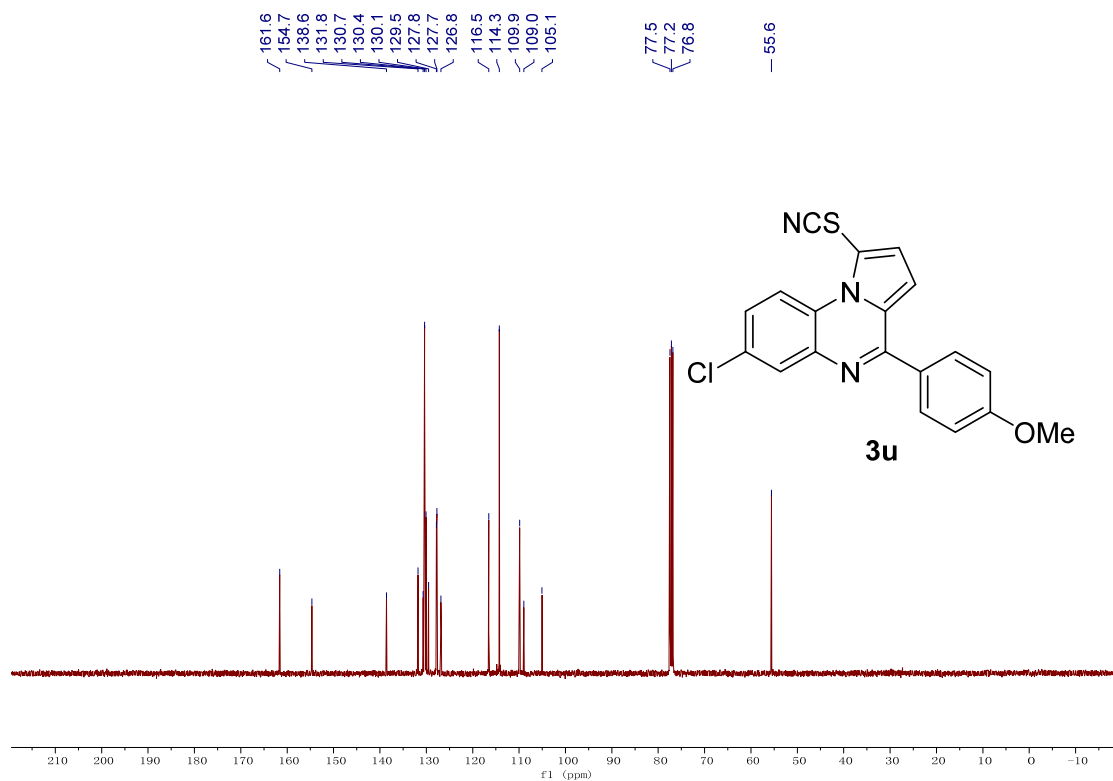

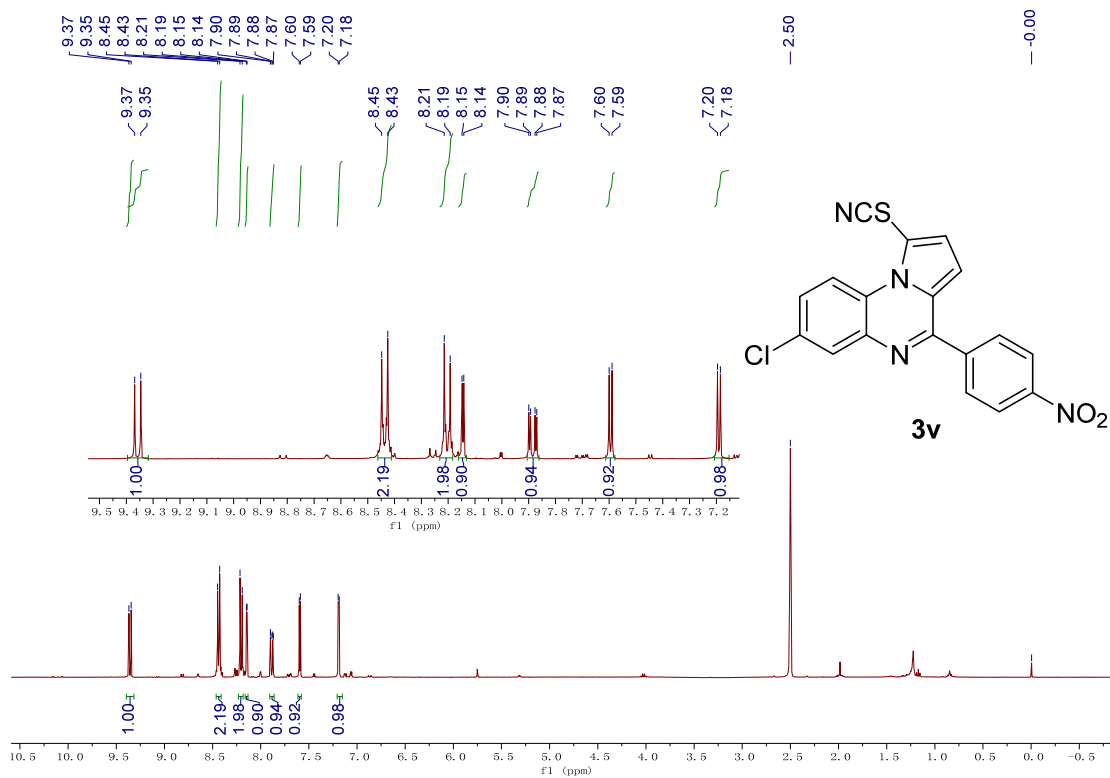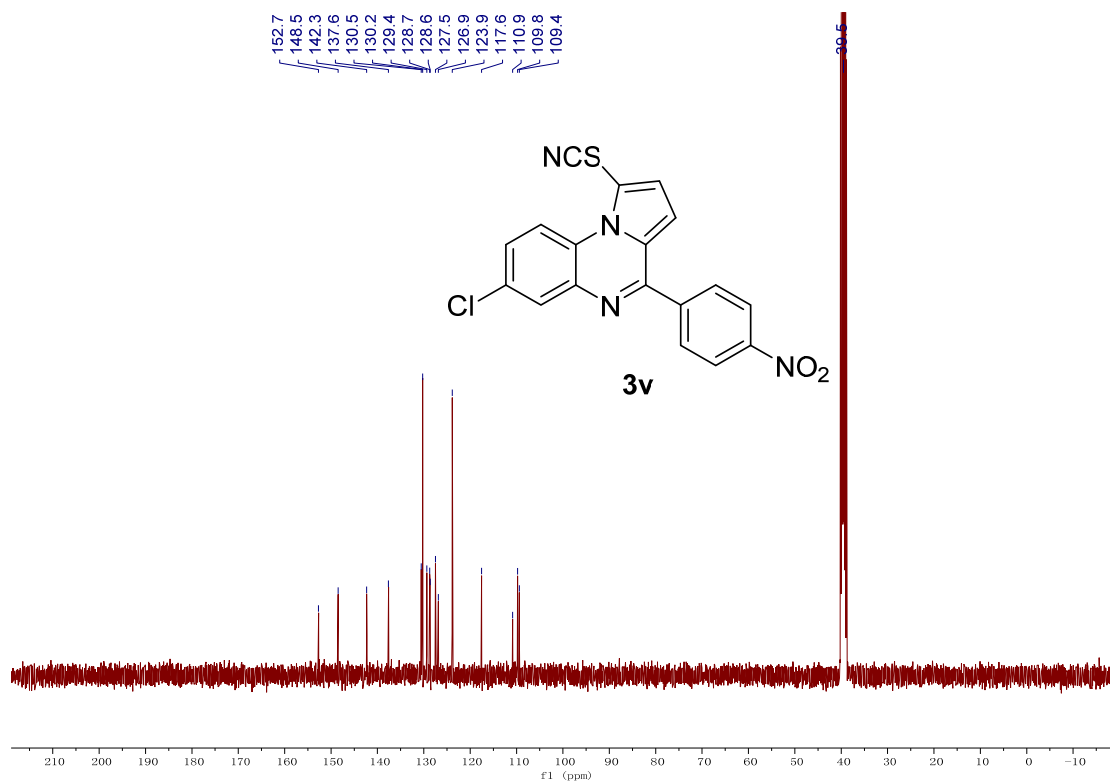

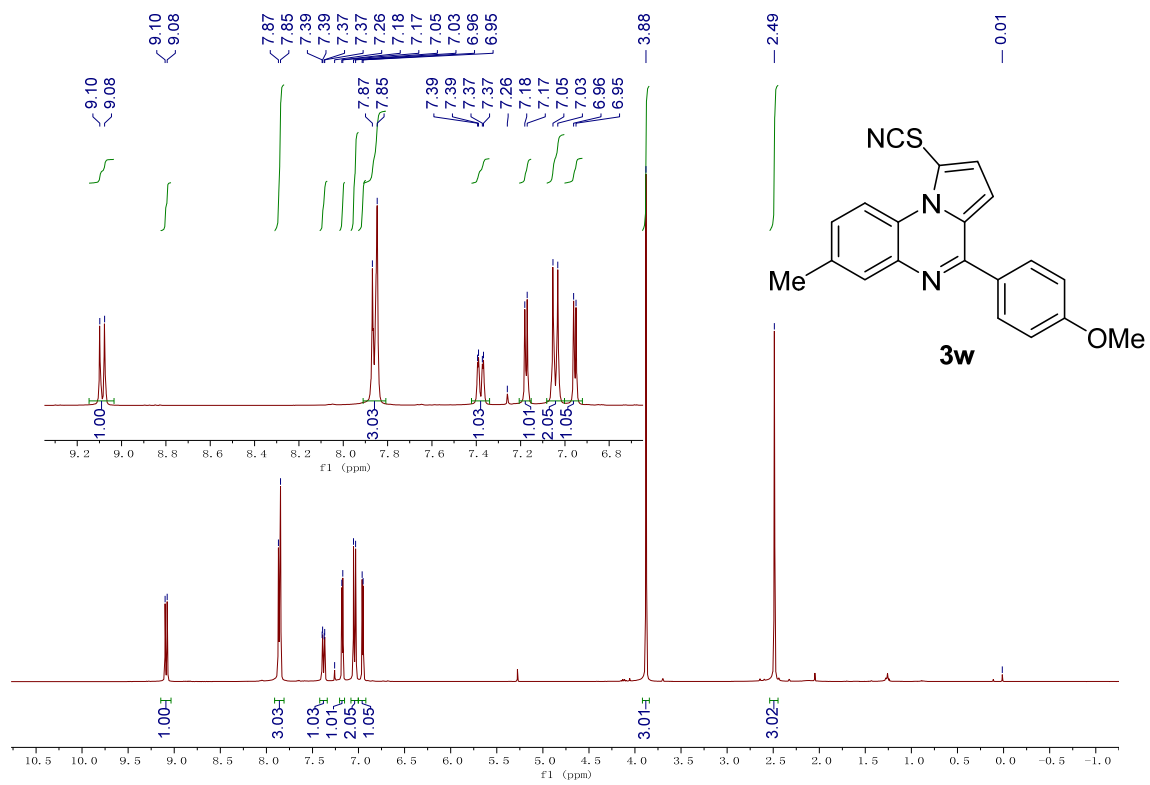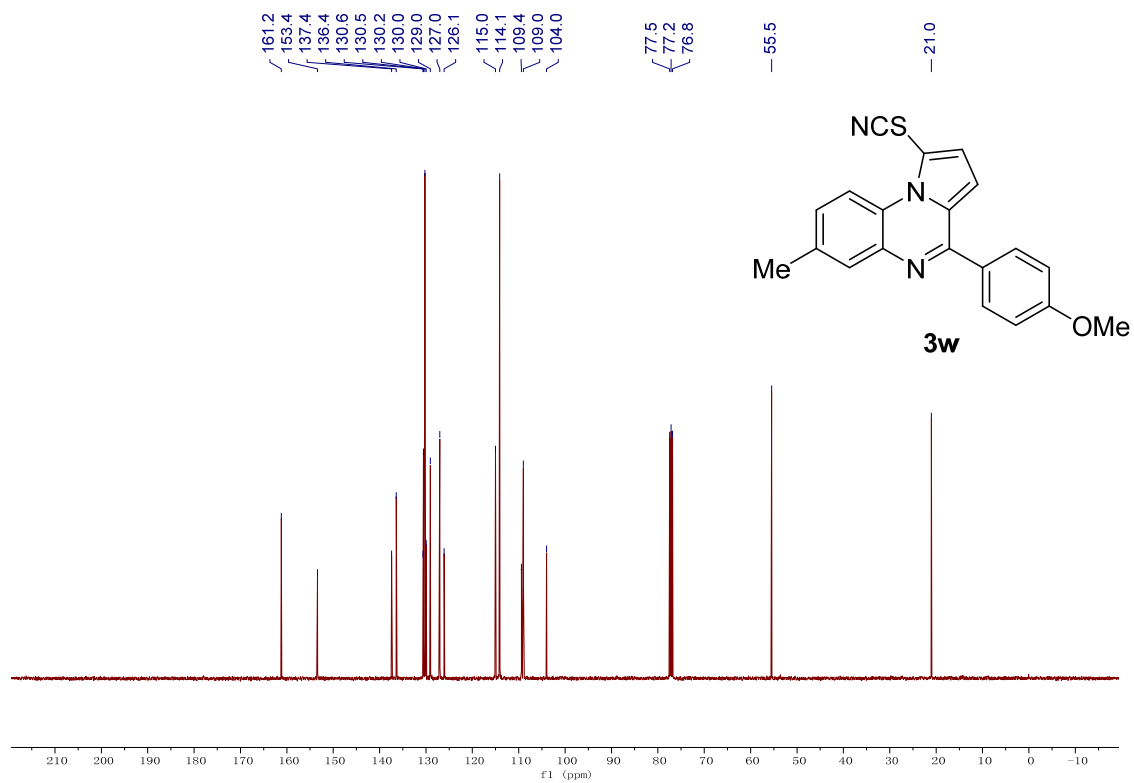

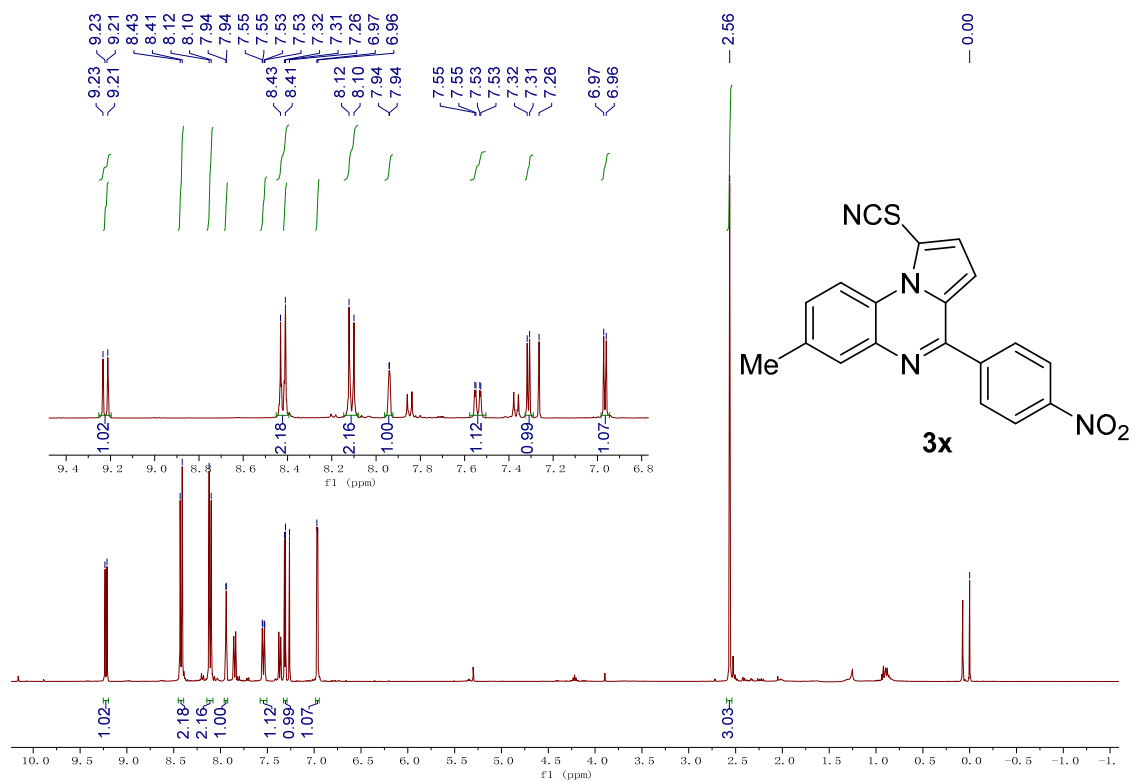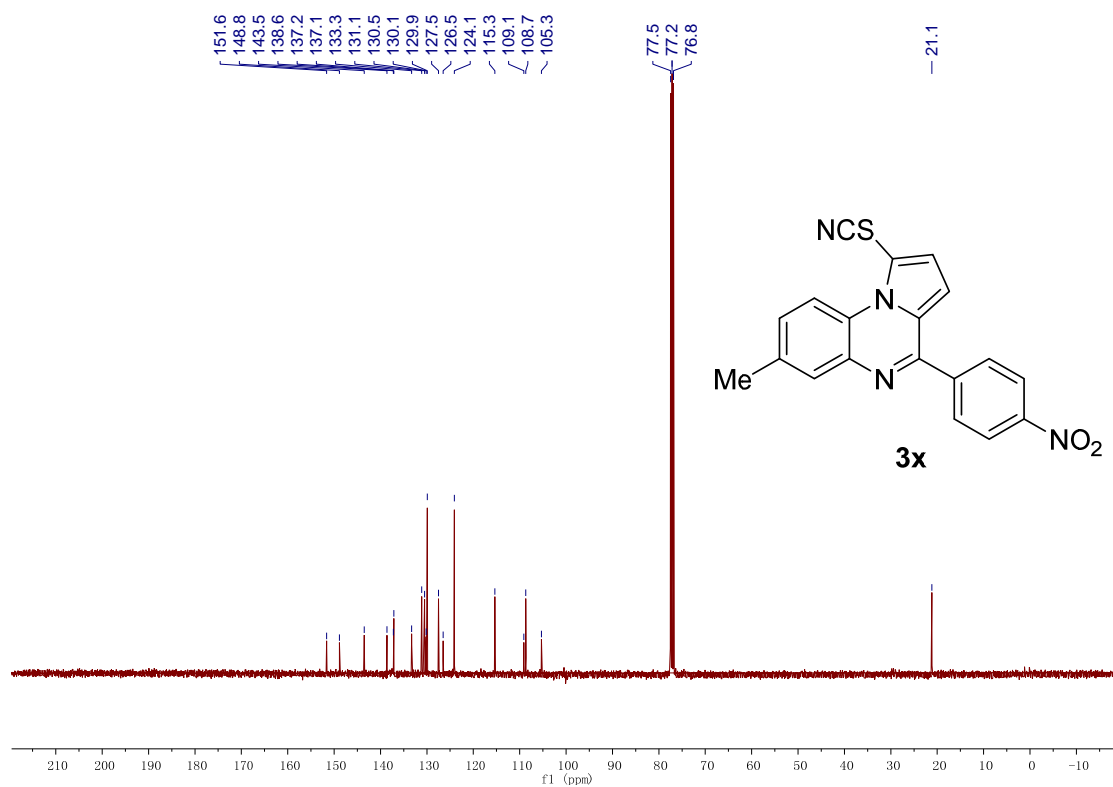

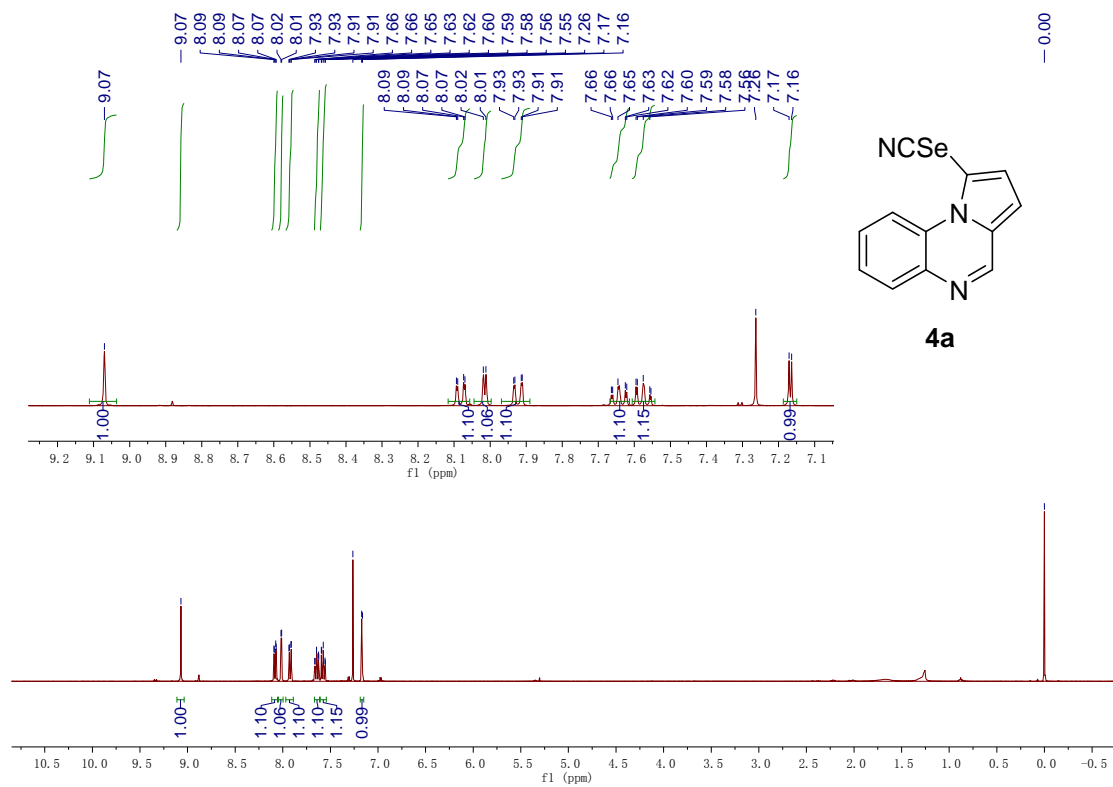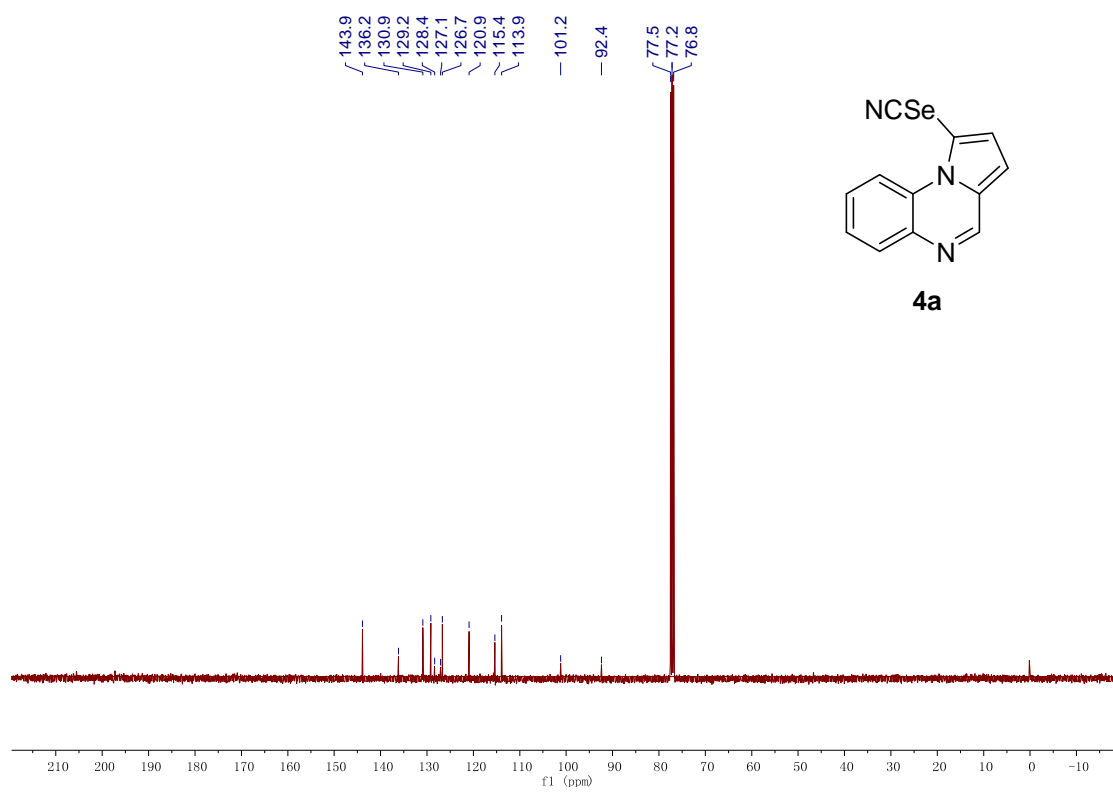



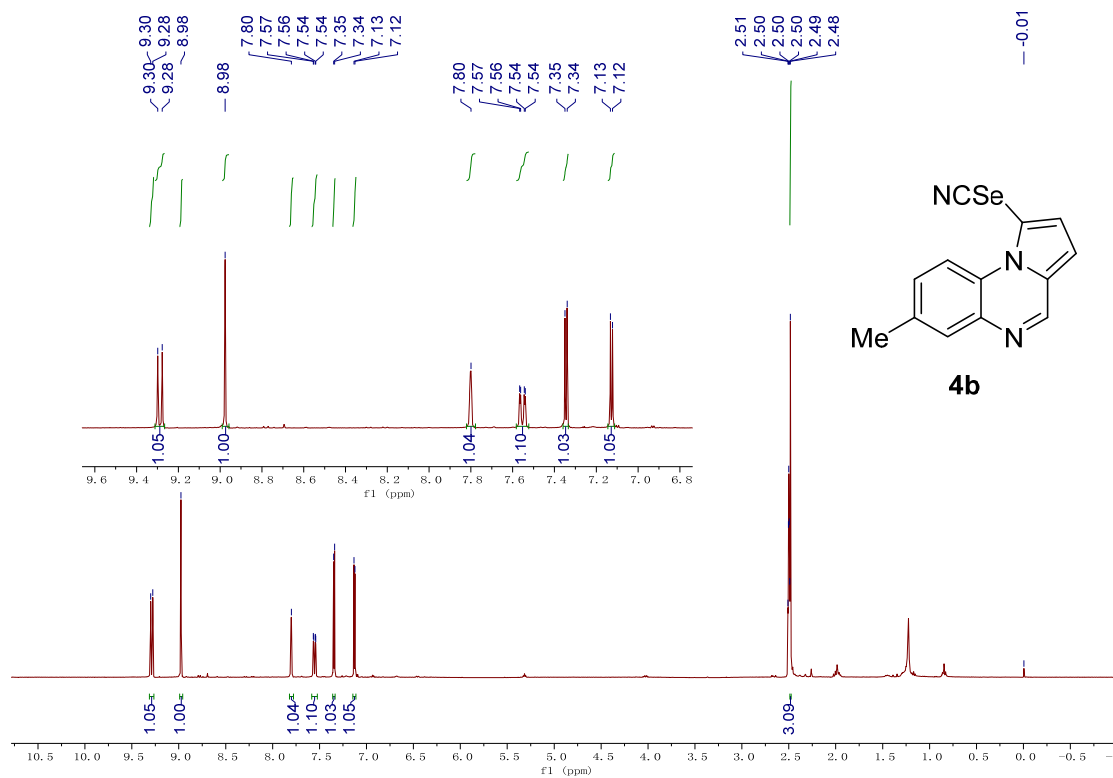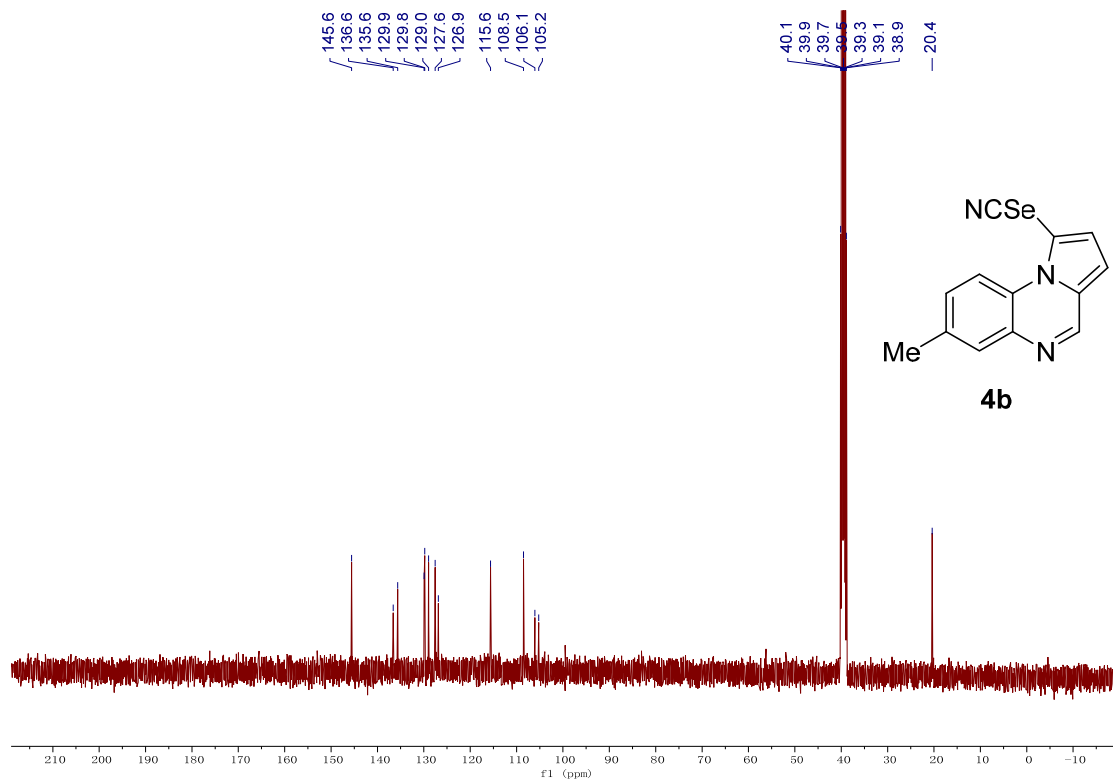

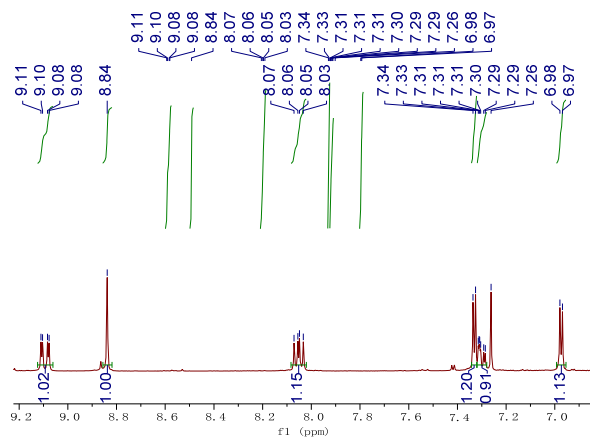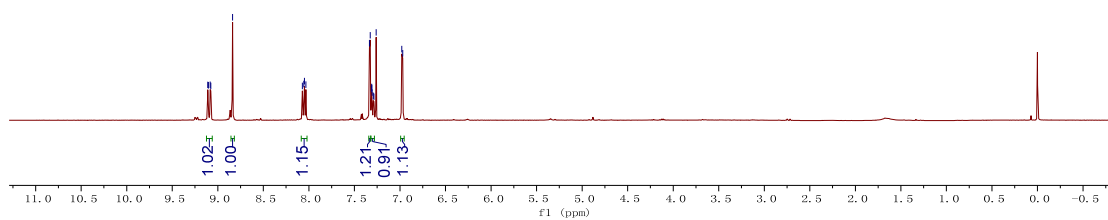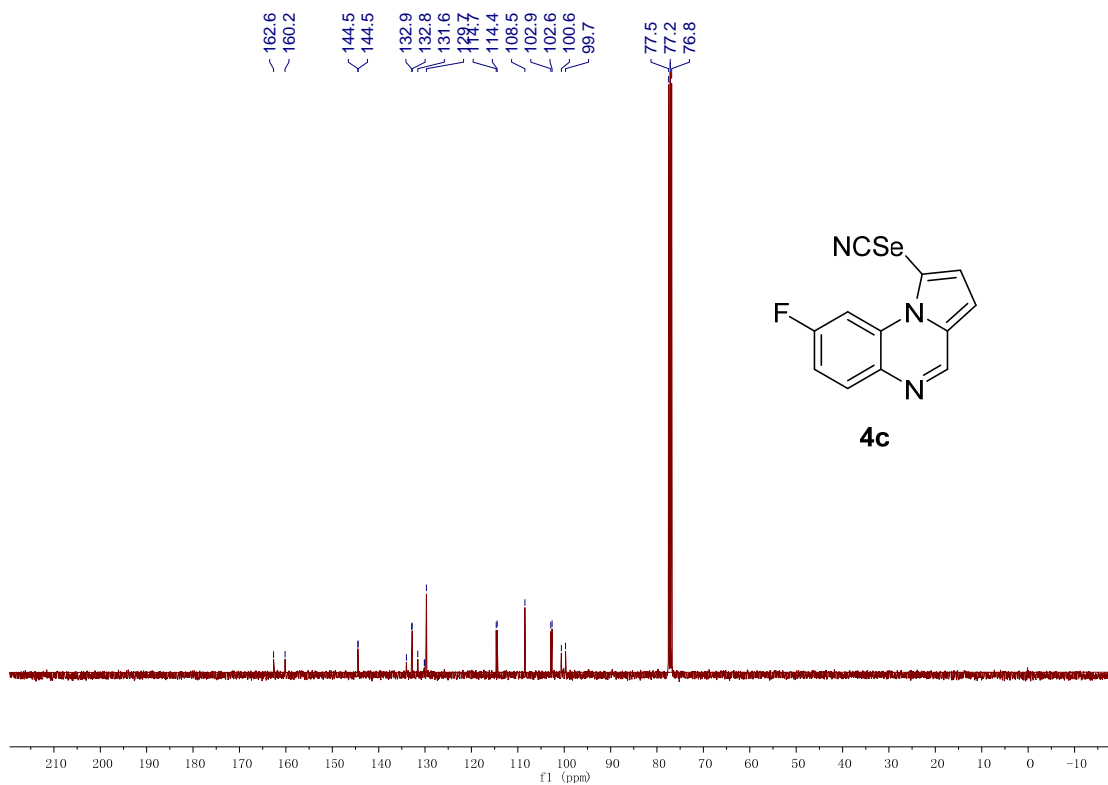



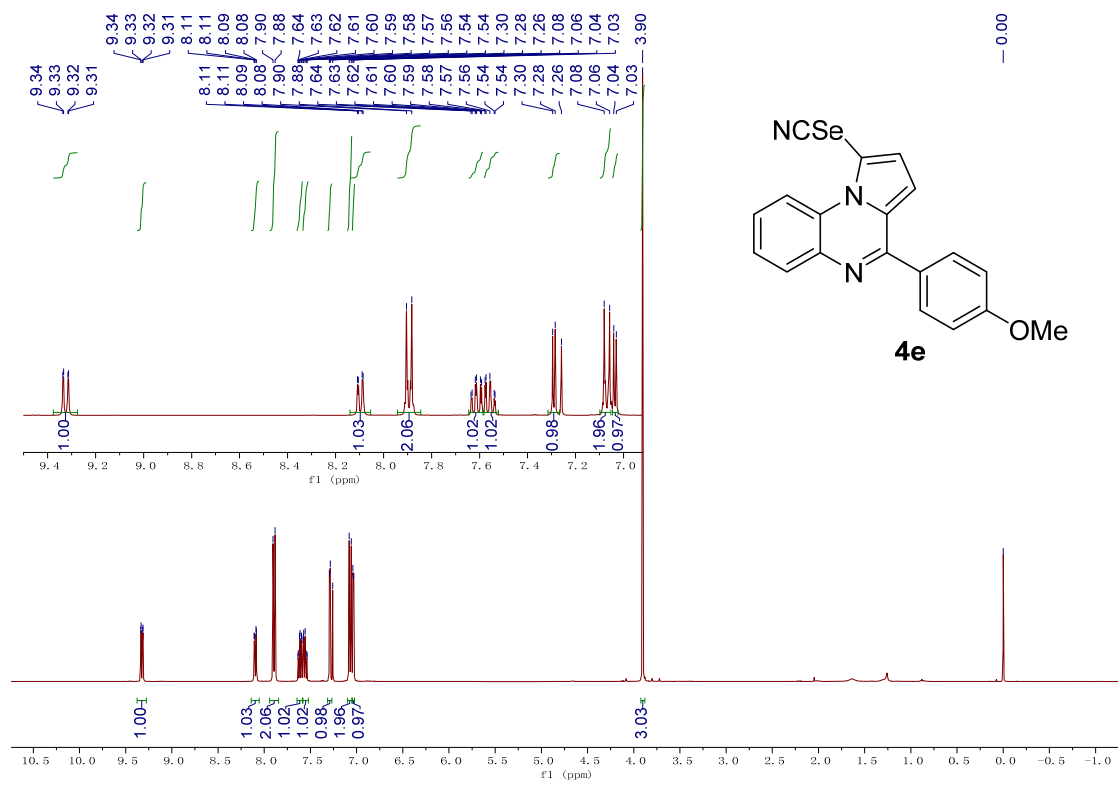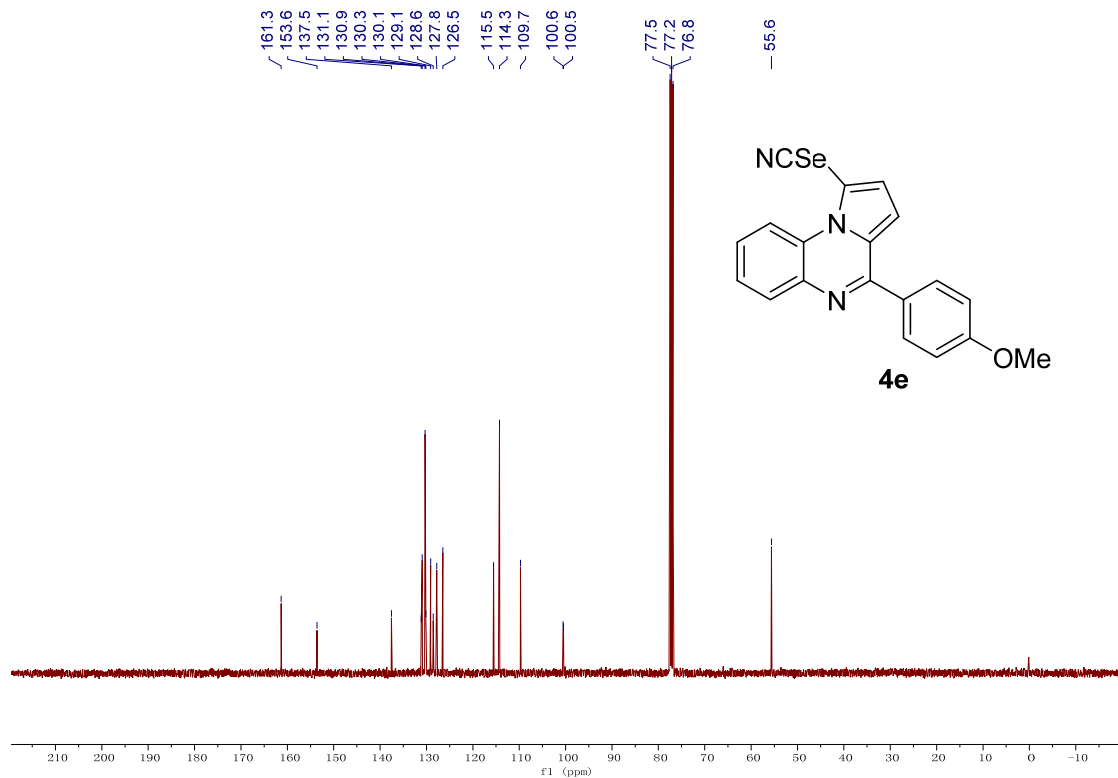

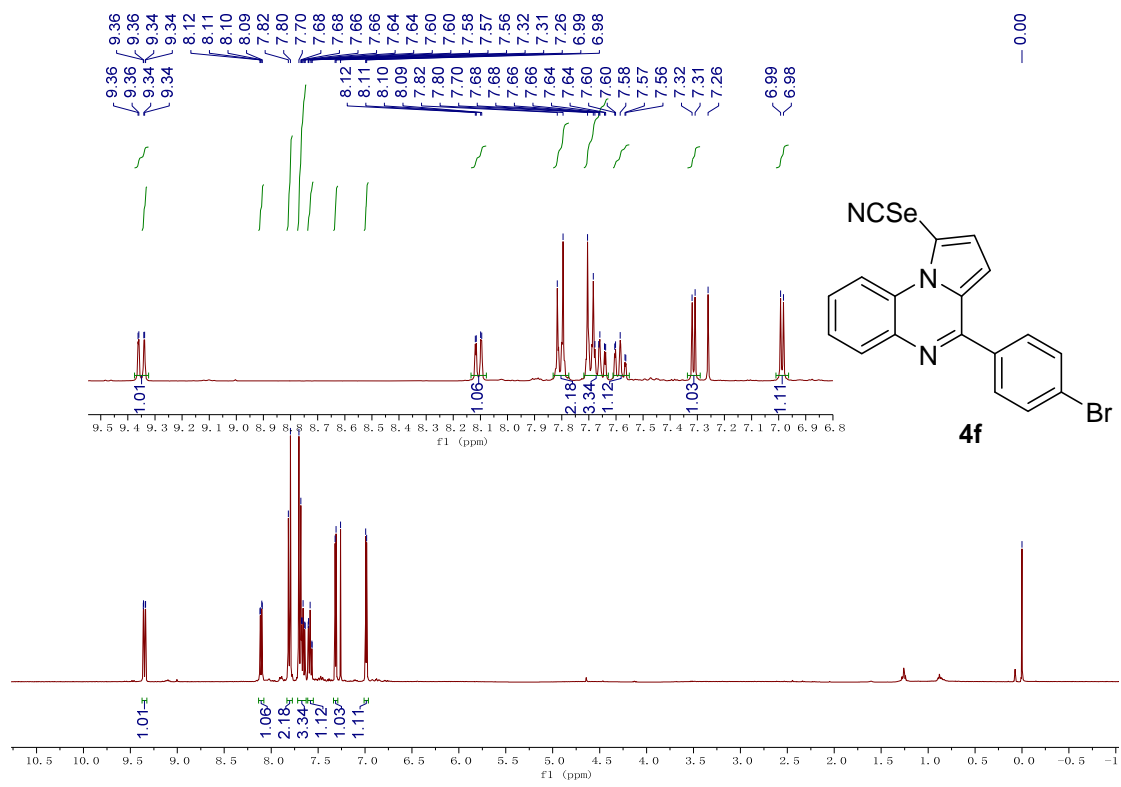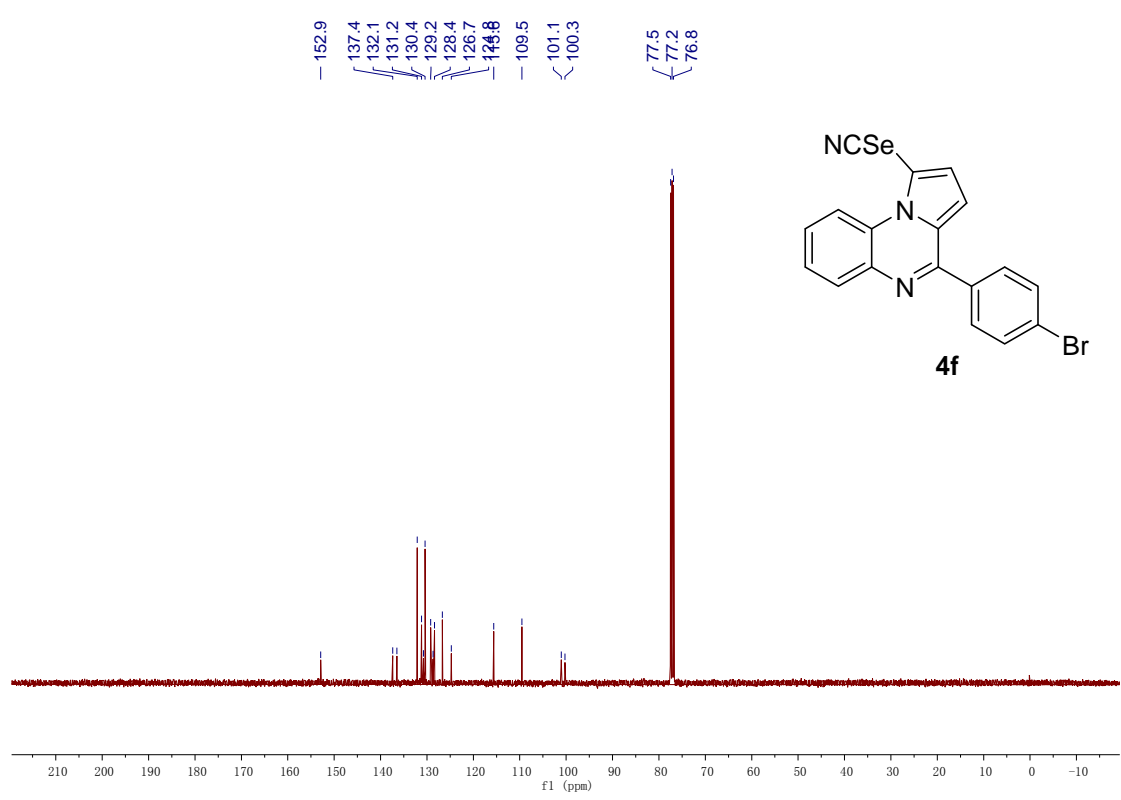



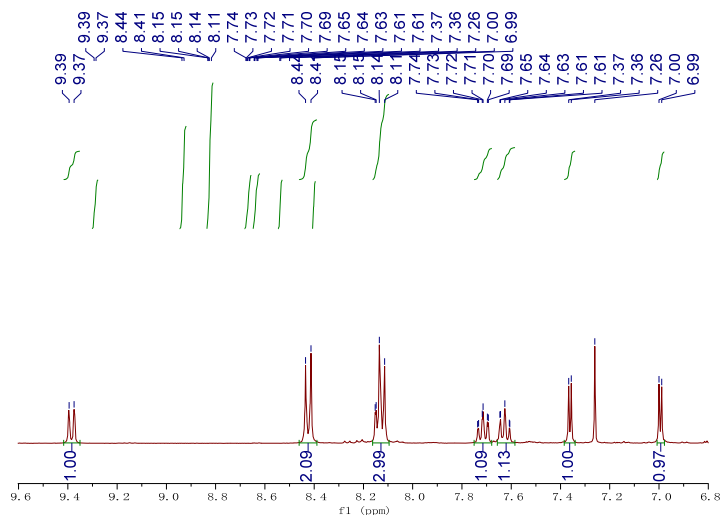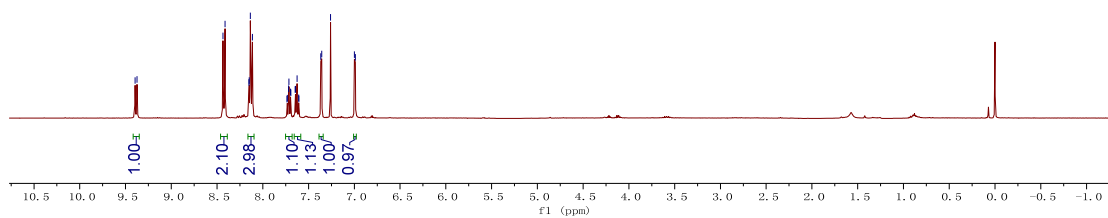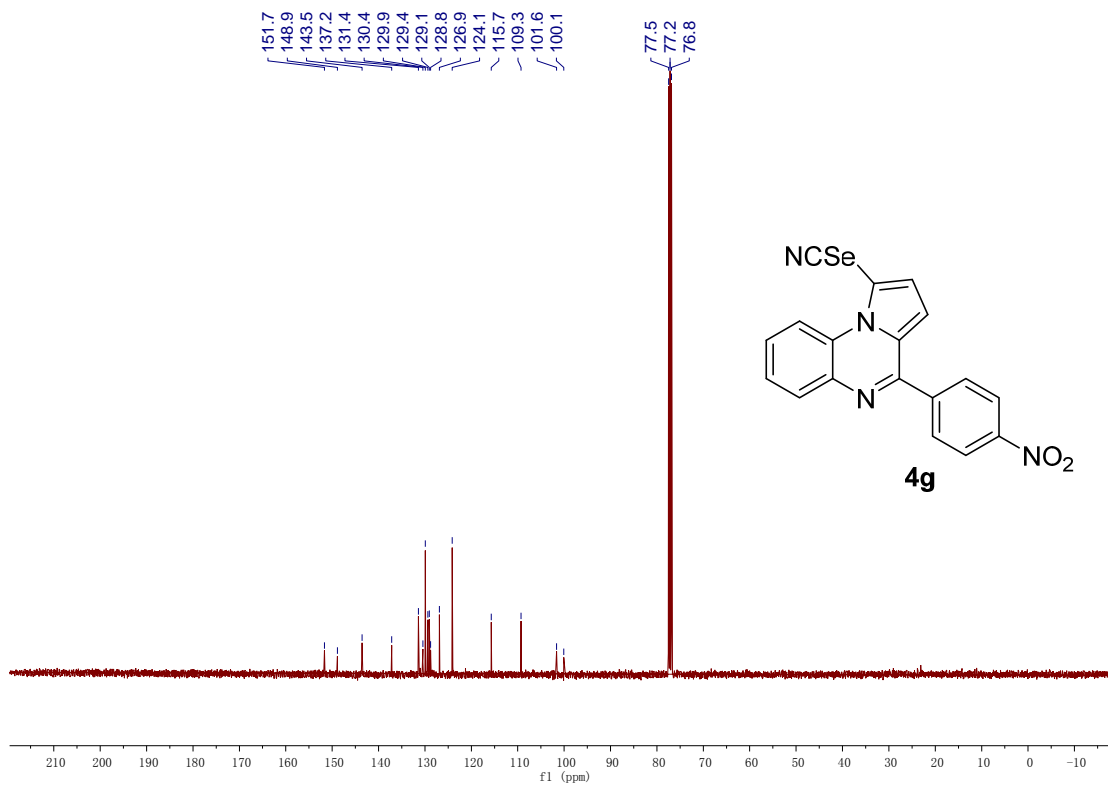







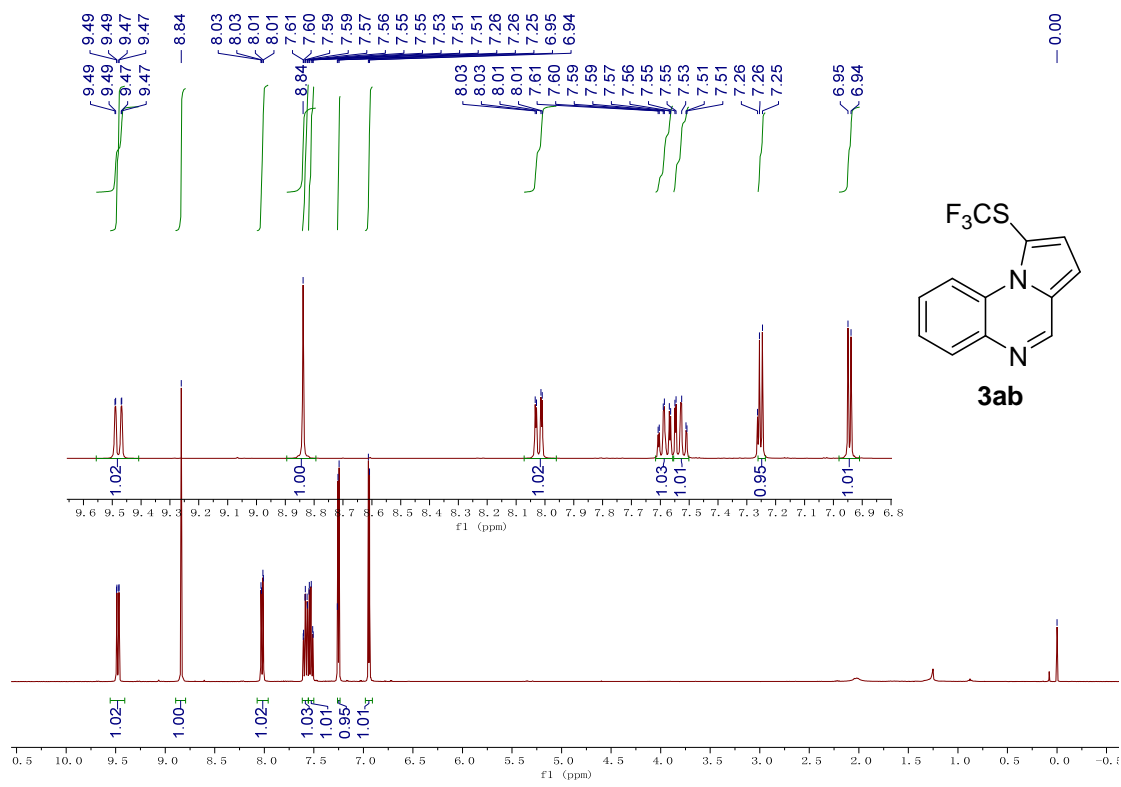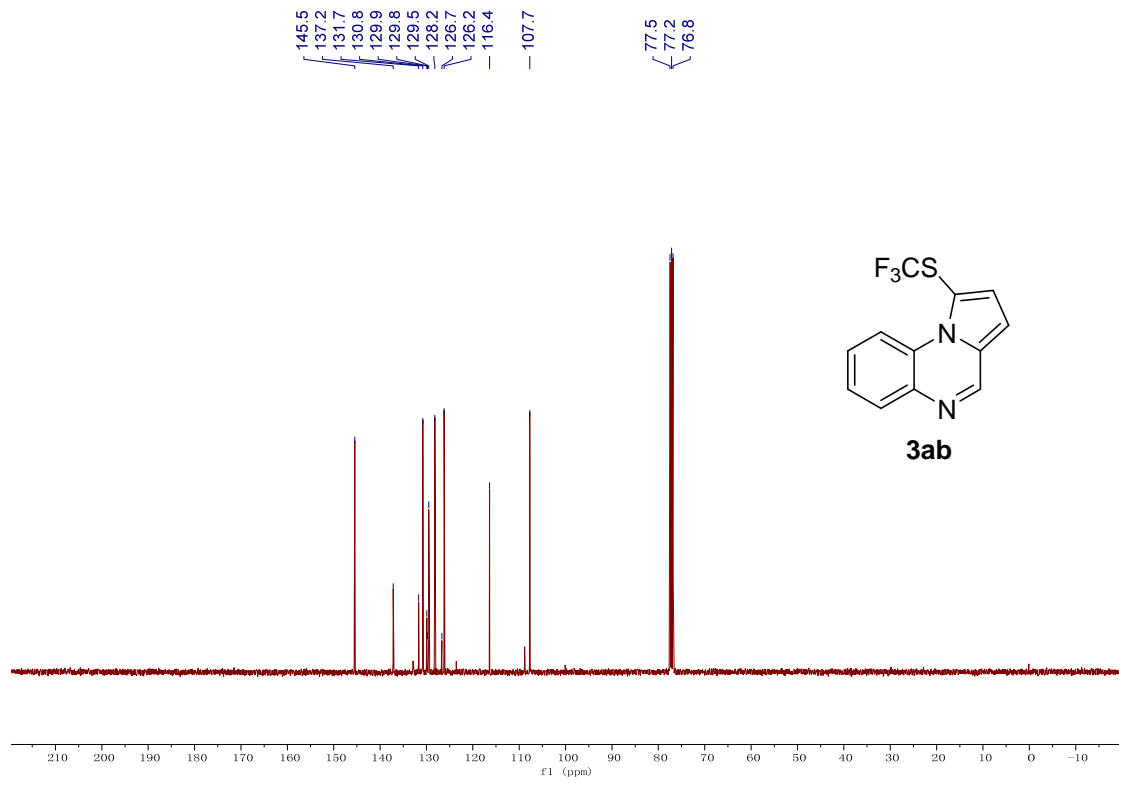

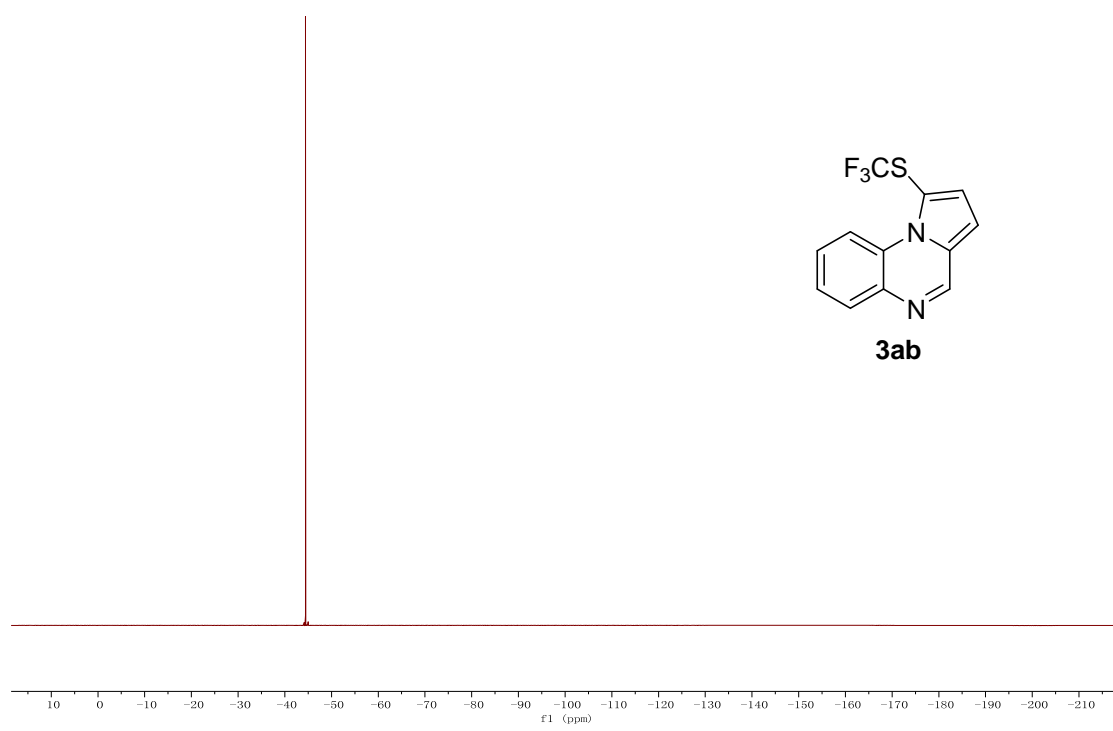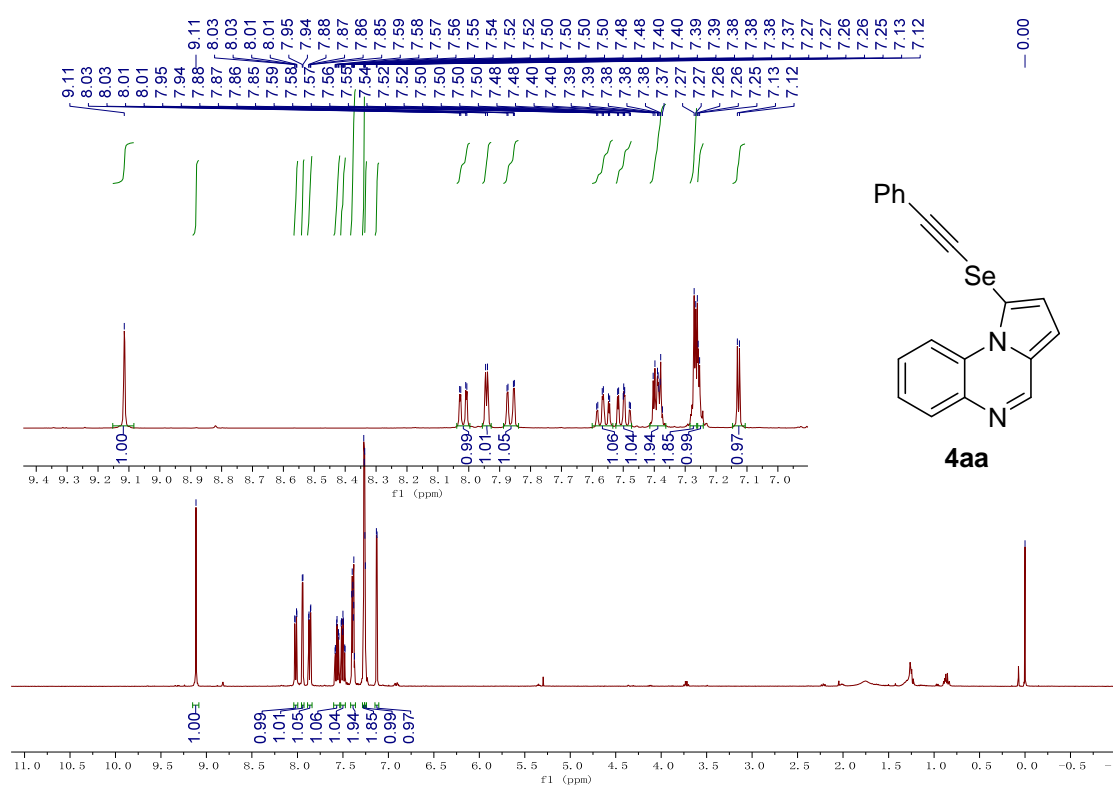

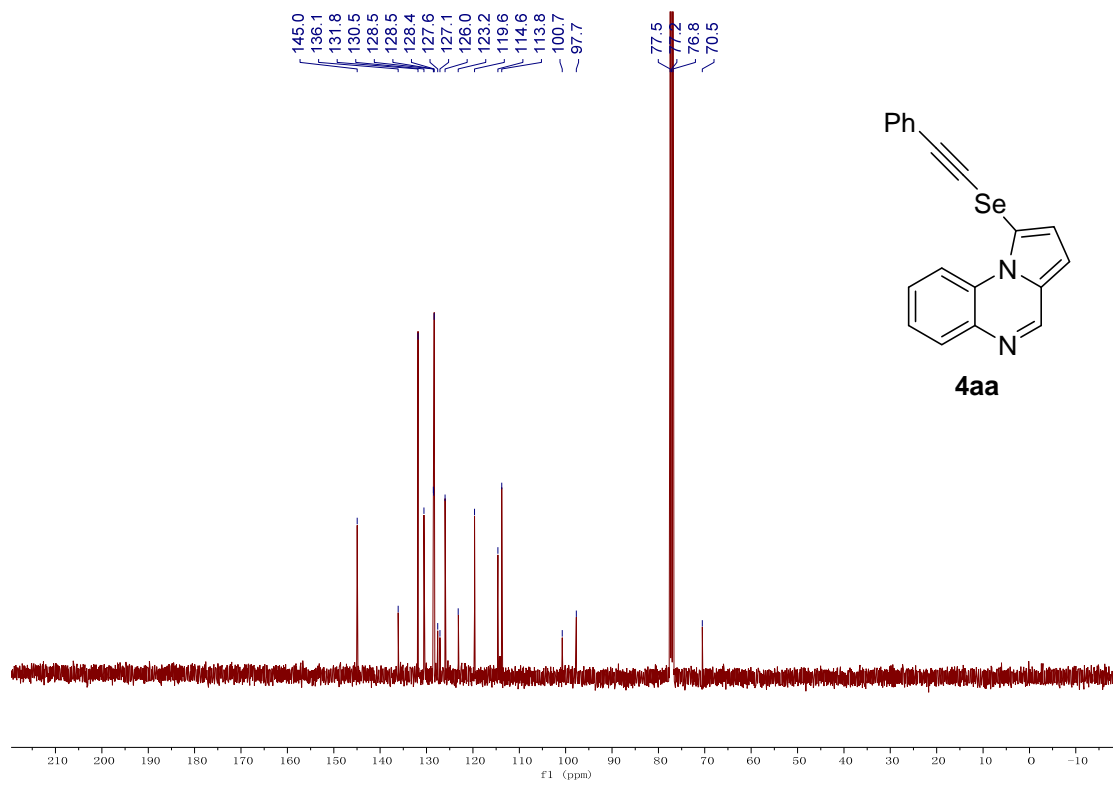

## Single Crystal Data of 3a

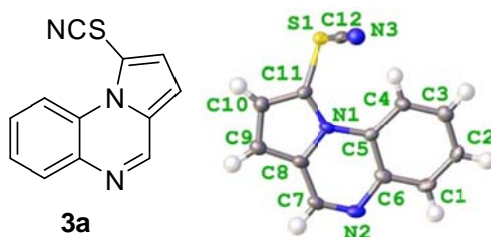

Structure of **3a** (CCDC: 1943642)

**Table 1 Crystal data and structure refinement for 3a**

|                                             |                                                               |
|---------------------------------------------|---------------------------------------------------------------|
| Identification code                         | 3a                                                            |
| Empirical formula                           | C <sub>12</sub> H <sub>7</sub> N <sub>3</sub> S               |
| Formula weight                              | 225.27                                                        |
| Temperature/K                               | 150.0                                                         |
| Crystal system                              | monoclinic                                                    |
| Space group                                 | Pn                                                            |
| a/Å                                         | 16.2160(5)                                                    |
| b/Å                                         | 8.5645(2)                                                     |
| c/Å                                         | 16.5649(5)                                                    |
| α/°                                         | 90                                                            |
| β/°                                         | 117.9340(10)                                                  |
| γ/°                                         | 90                                                            |
| Volume/Å <sup>3</sup>                       | 2032.52(10)                                                   |
| Z                                           | 8                                                             |
| ρ <sub>calc</sub> /cm <sup>3</sup>          | 1.472                                                         |
| μ/mm <sup>-1</sup>                          | 0.289                                                         |
| F(000)                                      | 928.0                                                         |
| Crystal size/mm <sup>3</sup>                | 0.16 × 0.12 × 0.08                                            |
| Radiation                                   | MoKα (λ = 0.71073)                                            |
| 2θ range for data collection/°              | 4.756 to 52.758                                               |
| Index ranges                                | -20 ≤ h ≤ 20, -10 ≤ k ≤ 9, -20 ≤ l ≤ 20                       |
| Reflections collected                       | 18145                                                         |
| Independent reflections                     | 7628 [R <sub>int</sub> = 0.0540, R <sub>sigma</sub> = 0.0683] |
| Data/restraints/parameters                  | 7628/2/577                                                    |
| Goodness-of-fit on F <sup>2</sup>           | 1.046                                                         |
| Final R indexes [I ≥ 2σ (I)]                | R <sub>1</sub> = 0.0451, wR <sub>2</sub> = 0.0869             |
| Final R indexes [all data]                  | R <sub>1</sub> = 0.0683, wR <sub>2</sub> = 0.0997             |
| Largest diff. peak/hole / e Å <sup>-3</sup> | 0.28/-0.27                                                    |
| Flack parameter                             | 0.09(7)                                                       |
